# Supplementary material
Source: publisher figshare collection journal article supplement (https://diabetesjournals.figshare.com/ndownloader/files/24172898)
Supplement: Supplementary file 1 [file 24172898]

## Sheet: DEGS_All
T1D			T2D			BFA
Dataset 1	Dataset 2	Dataset 3	Dataset 4	Dataset 5	Dataset 6	Dataset 7
A4GALT	AAED1	A4GALT	SYBU	PCOLCE2	A2M-AS1	ARF4
A4GNT	AAR2	AAAS	MFN1	ARG2	ABI3	CYB5D1
AADAT	ABCA3	AACS	FUT6	ELFN1	ACSL1	ZNF598
ABCB1	ABCC8	AADAC	HAX1	PRIMA1	ACSL3	MFSD2A
ABCG4	ABHD10	AADAT	TCEA1	RP1-212P9.2	ADHFE1	RRP12
ABHD14B	ABHD15	AAED1	ERO1LB	FAIM2	ADI1	HYOU1
ABI3BP	ABLIM1	AARSD1	AASDHPPT	PTPN3	AGK	HSPA5
ABRACL	ABT1	ABCB11	PRDX4	TSHR	AGR3	HERPUD1
ACE	AC007204.2	ABCC1	SRP72	RASSF10	AHCYL2	CYCS
ACKR3	AC007383.3	ABCC3	APEX1	CTSV	AK8	SLC30A8
ACP2	AC019117.2	ABCC4	SERBP1	ACOT13	AKAP5	JMJD6
ACP6	AC079630.2	ABCC5	IAPP	RP11-320H14.1	AKR1C1	SYVN1
ACSBG2	AC090044.1	ABCC8	SPCS1	DHRS7	AKR1C2	KIAA0513
ACSL4	AC123768.4	ABCD3	IARS	NDUFS1	ALG9	LZTFL1
ACSL5	AC132216.1	ABHD12	PSMG1	MRPL18	ALOX15	MYBBP1A
ACSM3	ACACA	ABHD14A	STOML2	MYLK3	AMD1	POLR3D
ACTA2	ACAN	ABHD15	UPF3A	HCN4	AMT	SLC31A1
ACVRL1	ACE	ABHD16A	CDC40	KCNAB2	ANGPTL4	GPT2
ADAMTS9	ACOT1	ABHD17B	IPO5	ENDOD1	ANKRD13C	MAP1LC3B
ADARB1	ACOT2	ABHD6	ARMCX1	RDH10	ANXA9	C17orf107
ADAT3	ACRBP	ABI3	DNAJB9	NDUFS4	AOC3	IQSEC2
ADCK2	ACTRT3	ABI3BP	TM9SF2	HS6ST2	AOC4P	ZCCHC7
ADH5	ACVR2A	ABLIM1	USP1	NTPCR	AQP4-AS1	SERP1
ADIPOR2	ADAM22	ABLIM2	PDIA6	SLC26A4	AREG	MANF
ADNP2	ADAMTS2	ABLIM3	HSPG2	MPC1	ARFGAP3	NPRL2
ADORA2A	ADAP2	ABRACL	SECTM1	FAM47E /// FAM47E-STBD1 /// STBD1	ARHGAP11B	SELENOS
AGER	ADCY2	AC000124.1	ACSL1	TMEM37	ARHGDIB	SRPRB
AGFG2	ADCY5	AC002480.4	GPR89A /// GPR89B	SDHB	ARHGEF11	GOSR2
AGO2	ADSSL1	AC004158.2	C7orf43	ADH5	ARHGEF28	DPH2
AGR3	AGBL4	AC004221.2	FNDC3A	FTL	ARPC1B	SUPV3L1
AIFM2	AIF1	AC005083.1	WDR12	GABRA2	ARRDC4	VOPP1
AIMP2	AIG1	AC005152.2	UNC50	C11orf87	ASCC3	TBC1D15
AKIRIN2	AK9	AC005498.3	ARCN1	DQ592442	ATF3	NDEL1
AKR1B1	AKAP5	AC005606.14	CHMP3 /// RNF103-CHMP3	COMMD1	ATP8B3	KDELR2
ALAS1	AKIRIN1	AC007092.1	MICB	MRPS18C	B4GALNT1	TIMP2
ALDH1B1	AKT3	AC007283.5	NMT1	GREM2	BDNF-AS	USP36
ALDH5A1	AL121761.2	AC007383.3	SLC28A3	RPA3	BEST1	MSTO1
ALG12	AL589765.1	AC007389.3	PRKCZ	SRXN1	BHLHE40	SLC35E1
ALKBH1	ALDH5A1	AC007405.6	ISOC1	NHLH2	BRCA1	NCDN
ALPL	ALPPL2	AC007773.2	FBXL5	EPB41L1	BRD8	NUB1
AMHR2	ALS2	AC007879.2	CLK1	SMIM13	BRINP2	MPC1
AMT	ALS2CR11	AC009336.24	TMX4	TOMM20	C10orf76	ADAMTS2
AMZ2	AMBP	AC009495.2	CXorf40B	TMEM126B	C1QTNF1-AS1	ZFPL1
ANAPC1	AMER2	AC009495.4	BCL2L2	PCCB	C20orf196	SRP54
ANGEL1	AMER3	AC012309.5	LSM12	MRPS33	C20orf96	POLR3E
ANGPTL6	AMIGO1	AC013268.5	UBE2D2	LOC101927734	C21orf62	CNOT9
ANKRD1	AMZ2	AC016722.1	CYP3A4	ATP5F1	C22orf39	EPB41L1
ANKRD13B	ANKMY2	AC017002.1	SRSF10	ATP6V1H	C2CD4A	LOC728392
ANKRD22	ANKRD20A1	AC017048.4	PCSK1	SLC2A1	C2orf76	FTSJ1
ANKRD27	ANKRD20A2	AC022007.5	MRPL3	B4GALT4	C4B_2	ODF2
ANKRD29	ANKRD22	AC022816.2	DHX29	CKS1B	C8orf33	PGM3
ANKRD46	ANKRD39	AC023490.1	WDR61	TMEM126A	C9orf116	PRNP
ANO1	ANKRD7	AC069513.4	BLOC1S5-TXNDC5 /// TXNDC5	PSMC2	CA11	PGAM5
ANTXR1	ANXA6	AC069547.1	PSMD11	CHODL	CA14	PI4K2A
ANXA3	ANXA7	AC073343.1	SEC63	PAICS	CAMSAP1	DHDDS
AOC1	AP000688.29	AC073346.2	GPRIN2	PSMA3	CAPN3	NXT1
AP1B1	AP000769.7	AC074138.3	PPM1A	PDP2	CBR4	GOLGA3
APBA3	APCDD1L	AC084018.1	COL16A1	GRIN2D	CBX3	PHF20L1
APLN	APH1B	AC092171.4	PIKFYVE	NDUFV2	CCDC102B	NOLC1
APOH	APOB	AC093063.3	SRSF6	C18orf8	CCDC121	CRIPT
APOOL	AQP4	AC093157.1	MAPRE1	OSTF1	CCDC150	MAFB
APOPT1	AQP7	AC093375.1	PLAGL1	NASP /// NASP	CCDC152	BSDC1
AQP1	AQPEP	AC093850.2	UBE2M	SMAD9	CCDC34	PNO1
AQP7	AREL1	AC096772.6	CAMKK2	SNRPD2	CCR1	TMEM41B
AQP7P1	ARF5	AC104135.4	PPP1CC	PGRMC1	CCR5	DNAJA3
ARAP1	ARHGAP10	AC109826.1	G3BP2	NIF3L1	CD247	SEC13
ARF5	ARHGAP20	AC112229.7	TMEM70	LOC148696	CD27-AS1	RPGRIP1L
ARHGAP26	ARHGAP36	AC115522.3	CCDC47	IMP3	CD82	CENPJ
ARHGAP31	ARHGEF26	AC116407.2	LMBRD1	MBNL2 /// MBNL2	CDC6	C11orf24
ARHGAP39	ARHGEF6	AC127496.1	HOXA3	FAM193B	CDCA8	ATG13
ARHGEF10L	ARIH2OS	AC132872.2	HSPE1	RAMP3	CDH24	UFM1
ARHGEF19	ARL15	AC139426.2	TMED10	CHMP2A	CEBPG	SIAH2
ARHGEF28	ARL2BP	AC141928.1	TMEM251	LONRF3	CELF1	IMP4
ARHGEF3	ARL3	AC144831.1	GABRP	MRPS30	CENPH	YRDC
ARL4C	ARNT2	AC147651.3	BET1	LSM3	CEP68	SNHG1
ARMCX6	ARSI	AC156455.1	ECI2	PPP1R1A	CEP85L	NOL6
ARR3	ARV1	ACAA2	TOP3A	NCKAP5	CETP	MAX
ARRB2	ASAH1	ACACB	SEL1L	RPL36AL	CHAD	YTHDF1
ARRDC4	ASB8	ACAD10	ANKRD46	TRMT10C	CITED2	IFRD1
ARSF	ASH1L-AS1	ACADL	RBP4	SNAPC5	CKAP2	HSPA9
ASPN	ASL	ACADSB	MAP3K11	DIAPH2	CMBL	ZNF140
ASTN2	ASNSD1	ACAP3	TTC19	RRAGD	CNN1	OGFOD1
ATF7IP2	ASTE1	ACAT1	PEX2	SPAG7	CNNM3	PMM2
ATG12	ATG9B	ACBD6	ATP5B	PELO	CNTNAP2	TUBA1A
ATG13	ATP1A3	ACE	TEX261	TAMM41	COL22A1	SRPRA
ATG2A	ATP2A3	ACHE	ZNF518A	TUBB2B	COL6A6	CCDC149
ATIC	ATP6AP2	ACKR5	GAL3ST4	DGUOK	COPG1	NAT9
ATP5F1	ATP6V0B	ACKR6	LRRFIP1	OPA3	COPS7B	TMEM263
ATP6V1G2	ATP6V0C	ACN9	PFN2	MLLT6	CORO1A	ATF6
ATRAID	ATP6V0D1	ACO1	HMGB1P12 /// HMGB1P12	CMAS	CPT1A	KDELR3
ATXN7L3	ATP6V1D	ACOT11	SLC25A5	TMEM27	CREB3	RIOX2
B3GALNT2	ATP6V1E1	ACOT6	NUCB2	PPCS	CREB3L4	HSP90B1
B3GNTL1	ATP6V1F	ACOT9	ILF2	C14orf119	CRISPLD1	SCGN
B4GALNT4	ATP6V1G1	ACOX2	UAP1	METTL5	CSPG4P1Y	UBE2B
BAALC-AS2	ATP8A1	ACP2	MCM3AP	IER3	CSRNP1	NARS
BAAT	ATPAF1	ACPP	CCL5	C11orf73	CTNNA3	ATF3
BACE1	ATXN1	ACSL5	DAP	PRR26	CTNNBIP1	COQ10B
BACH1	AVPR1B	ACSL6	MBD1	LOC102724814	CTSF	OSBPL2
BAP1	B3GALT4	ACSS1	EEF1A1	TWF1	CTSZ	ATG101
BATF3	BACE1	ACTBL2	AHCY	SOD1	CXCL1	BET1L
BBS2	BAG5	ACTR1B	PIGT	PRR13	CXCL8	SELENOK
BCAM	BANK1	ACTR3	SLC35B1	MRPS23	CYP26B1	DNAL1
BCDIN3D	BAZ1A	ACTR5	CEND1	ATP5O	DDIT3	RALA
BCL6	BBS4	ACTR8	SLC9A6	RAB30	DENND6B	ARMCX1
BCOR	BCAR3	ADAM20	CSNK2B	EIF2B3	DEPDC7	KDM6B
BDKRB1	BCAS2	ADAM33	C5orf22	DKK3	DLGAP1-AS1	EFR3B
BEST1	BCHE	ADAMTS1	CREB3L1	YPEL1	DNASE1	PNPLA8
BFSP1	BCL7B	ADAMTS4	EMC2	UTP11L	DPRXP4	CEP70
BHLHE41	BCL9	ADAMTS9	FZD9	CCT4	DPY19L2P2	TMEM39A
BID	BCLAF1	ADAMTSL2	VPS53	LINC01116	DRICH1	FARSA
BIRC3	BEND5	ADAR	NELFCD	SLIRP	DUSP1	NRBF2
BLCAP	BEST1	ADCK1	SGCE	NDUFS5 /// RPL10	DUSP5	TMEM248
BLMH	BEX2	ADCY1	EXOC1	TSPAN1	DYNLRB2	OXNAD1
BMP4	BEX4	ADCY7	USO1	MDH1	E2F7	ZNF395
BNIP3L	BEX5	ADH1B	AKAP11	HNRNPA0	ECM2	TOP3A
BPGM	BLCAP	ADH5	TMC6	INPP5D	ECT2L	ORMDL3
BRCC3	BLOC1S2	ADH6	PLCB3	CCT2	EDA	SCFD2
BRD4	BMP8A	ADM	MYH14	TTI2	EDEM1	RBKS
BRWD3	BRAP	ADORA1	TMX1	LRTM1	EDEM2	TMCO1
BSCL2	BRMS1L	ADORA2A	TNFRSF14	SCO1	EDN2	PCNX3
BTBD9	BRWD1	ADPRH	DCTN6	COX11	ELMOD3	NQO1
BTN2A2	BTBD3	ADPRHL1	IKBKAP	SNX11	ELMSAN1	GOT1
C11orf53	BTBD6	ADPRHL2	XPOT	GCC1	EMX1	ALKBH5
C11orf71	BTN3A2	ADRA1B	UBE2E3	ANKRD20A12P /// LOC101059949 /// LOC101060632 /// LOC101927345	ENPEP	POLE3
C12orf60	BX088651.1	ADRA2A	ZNHIT3	KIAA1045	ENTPD3-AS1	MNT
C12orf75	C10orf107	ADRA2C	NSMAF	ATP5H	EPDR1	INTS6
C14orf105	C10orf95	ADTRP	CACNB1	TMEM60	ERMAP	RASSF1
C14orf169	C11orf1	AF064858.8	GALC	TMEM59L	ETV5	SCD5
C15orf41	C11orf70	AFAP1L1	PTGES3	EFTUD1	EZH1	BLZF1
C15orf48	C12orf23	AFG3L2	BEX4	PSMA1	F2R	ISG20L2
C1orf116	C12orf76	AGO1	ZNHIT6	MED27	FADD	COASY
C1orf162	C14orf182	AGPAT3	PTS	RPL26L1	FAM134C	GOLGA5
C1QTNF1	C14orf28	AGT	ZFAND1	APOO	FAM182A	GSN
C1QTNF3	C15ORF37	AHCY	GTF3C3	ODC1	FANCD2OS	ZNF608
C1QTNF6	C15orf40	AIG1	OXSM	SPTLC3	FARP2	BMF
C1R	C16orf87	AIM2	MIS12	MYOM1	FBXO24	UCHL5
C1S	C17orf100	AK4	MBD3	POLR3K	FCMR	GNL2
C20orf96	C17orf104	AKAP7	GOLGA5	TACC2	FDX1	NEURL4
C21orf62	C17orf105	AKIP1	GTSE1	FAM71C	FEZ1	HCG18
C21orf62-AS1	C17orf82	AKIRIN2	CCNF	MICAL1	FGF14-IT1	MAP1A
C22orf39	C1D	AKR1B10	IPO4 /// TM9SF1	TUBA1B	FGF2	BCAS2
C2CD2L	C1orf112	AKR1C2	KDELR2	ANKRD46 /// GAPDHP62	FICD	EIF2S3
C2orf44	C1orf132	AKR1C3	ZNF358	PTPRU	FKBP6	LAPTM4B
C2orf74	C1orf233	AKR1C4	PRPS1	DBI	FKBP7	COG6
C3orf18	C1orf52	AKR7A2	CRKL	RIMKLA	FOS	DNAJC25
C3orf67	C1orf74	AKR7A3	UNC119B	KIRREL3	FUNDC1	DDX50
C4orf3	C1QB	AL009178.1	HAT1	PLA2G16	G6PD	TMEM104
C5orf28	C1QC	AL031666.2	SUCO	CRHBP	GALNT15	TSN
C6	C1QL1	AL035610.1	TSPY1	CXXC5	GAS6-AS2	SRA1
C6orf106	C20orf112	AL132709.5	MIR6872 /// SEMA3B	AP5M1	GATS	SEC16A
C6orf223	C21orf119	AL162759.1	ALG5	PROCR	GCLC	SCYL1
C8orf59	C22orf26	AL355149.2	SF3B1	PRKCD	GCLM	ENG
C9orf9	C2orf70	AL357673.1	PIK3R4	PBDC1	GDF5	ANGPTL2
CA8	C3orf14	AL626787.1	SRSF7	TNFRSF21	GEMIN7	SDC2
CABLES1	C3orf18	ALAD	MKRN2	LOC100506411	GEMIN8	GZF1
CAD	C3orf33	ALAS2	DCTD	MRPL1	GJB2	TPMT
CALHM2	C3orf67	ALDH1B1	SRSF8	BOLA3	GK	GNL3
CALML4	C3orf83	ALDH3A2	LOC101060321 /// LOC101060351 /// LOC101060376 /// LOC101060389 /// LOC102723859 /// LOC102724862 /// TBC1D3 /// TBC1D3C /// TBC1D3F /// TBC1D3H	DARS2	GNGT2	PPP1R11
CARHSP1	C5AR1	ALDH3B1	MLH1	PPP2R5A	GNL2	ETF1
CASP5	C5orf55	ALDH4A1	ITGB4	EFCAB11	GNL3	GDA
CASP6	C6orf57	ALDH5A1	DLD	LOC102725454	GOSR2	LINC02693
CASP7	C7orf55	ALDH7A1	PSMD6	FFAR4	GP6	TCF4
CATSPER3	C7orf73	ALKBH3	DESI2	TIMM8B	GPAT3	ATAD3A
CBX1	C8A	ALKBH4	FGF16	ARPC1A	GPR3	ALDH18A1
CC2D2A	C8orf4	ALKBH7	RSL1D1	MRPL47	GPSM3	CREB3
CCDC102B	C9orf72	ALMS1	TRMT5	ABRACL	GRAMD3	GPR107
CCDC112	C9orf91	ALOX5AP	NUP37	NOD1	GRM3	TARSL2
CCDC113	CACNA1B	ALPK1	DDX46	PSMB7	GTF2H5	XPNPEP3
CCDC117	CACNG4	AMBP	ERC1	SATB1	GTF2I	SGTA
CCDC121	CALB1	AMER1	GUCA2A	GOT1	GTF2IP4	BRIX1
CCDC142	CALD1	AMHR2	SH3PXD2A	SLC9A3R1	GTF2IRD1P1	SENP2
CCDC152	CALHM1	AMIGO1	L1CAM	DHRS7B	GTPBP2	C2CD2L
CCDC189	CALHM3	AMIGO2	RPE /// RPEL1	RHBDL3	GZMB	GON7
CCDC191	CAMK2D	AMOT	METAP2	TCEB1	H2AFB1	DDX42
CCDC34	CAPN1	AMPD2	POP7	EMC3	HAUS1	FAM8A1
CCDC43	CAPN13	AMPD3	CXorf40A	CHTOP	HIST1H2AC	GCC2
CCDC6	CAPN14	AMT	EDEM1	CCT8	HLA-DMA	SIKE1
CCL2	CAPN7	ANAPC4	CAPN7	CATIP-AS1	HLA-DMB	CENPN
CCND2	CARTPT	ANAPC5	RABGGTB	FGFR2	HLA-DPA1	SLC35A2
CCNI	CASC19	ANGPTL1	MUC3B	PSMC1	HLA-DPB2	TMEM120B
CCNK	CASP3	ANGPTL6	C18orf32 /// RPL17 /// RPL17-C18orf32 /// SNORD58A /// SNORD58B /// SNORD58C	FASTKD5	HLA-DRA	YIF1A
CD209	CASP8	ANKH	TUBG1	MRPS36	HNRNPUL2-BSCL2	TULP3
CD247	CBLN1	ANKRD1	ANAPC13	MRPS22	HSD3B1	GORASP2
CD300LF	CCDC176	ANKRD11	USP16	CCDC167	HSPA5	TPD52L2
CD302	CCL26	ANKRD13A	FAM179B	ALS2CR11	HYKK	IPPK
CD40	CCL3L3	ANKRD13D	PPIP5K2	MDH2	IARS	PPP2R5B
CD7	CCNT2	ANKRD16	SCUBE3	SERPINB8	IER3	LONP1
CD82	CCSAP	ANKRD18A	TMEM50A	ATP1B3	IFT74	SEC63
CDC16	CD22	ANKRD22	PAICS	EIF4A3	IGDCC4	STK19
CDC25B	CD247	ANKRD34A	RIN3	LACTB2	IGFBP1	BBOF1
CDC5L	CD302	ANKRD35	NECAP1	LOC100507654	IGFBP6	SF3A3
CDCP1	CD36	ANKRD39	SERPINI1	MARS2	IL1RN	SMPD4
CDH24	CD48	ANKRD42	HMGN2	FH	IL5RA	NOL7
CDK8	CD97	ANKRD6	NME7	NDUFB9	IL6	CABP7
CDKL2	CDA	ANKRD65	TOMM20	NSMCE2	IMMP2L	DERL1
CDKN2AIPNL	CDC14B	ANKS3	TMX2	PDCD10	IMPG1	GTF2F1
CDX1	CDK17	ANO2	MAST4	AKT1	ING5	STX5
CELF5	CDKL2	ANO8	M6PR /// PHC1	PIGH	INTS3	AKAP17A
CENPBD1P1	CDO1	ANP32E	CST8	NDUFB6	IQCB1	POFUT2
CENPH	CENPC	ANXA13	SDHD	ZBTB8OS	ITIH1	BAG5
CEP104	CEP85L	ANXA4	ATP6V1A	BTBD10	JMJD7	MPHOSPH10
CEP290	CERK	ANXA6	ENPP2	EAF2	KANSL1	SELENON
CEP57L1	CFB	ANXA9	AP2M1	MRPL14	KCNJ1	E2F4
CEP68	CFTR	AP000349.1	XBP1	TBC1D5	KCNJ10	SLC25A38
CEP85	CGRRF1	AP000439.3	SYN3	MPHOSPH10	KCTD2	ZNF263
CFAP126	CHADL	AP000654.4	CUL1	TARS	KIAA0101	RTL10
CFDP1	CHCHD2	AP000769.7	PEX3	NCBP2-AS2	KIF15	CDK2AP2
CFI	CHD9	AP001372.2	KLHDC2	NOTUM	KLKB1	TMX2
CGB7	CHGB	AP006222.2	LMNA	SEPT8	KMT2E-AS1	STC2
CGREF1	CHRM4	AP3B1	NDFIP1	CMSS1	KNG1	CHD3
CHAD	CHRNA4	AP3S1	KLHL18	UBQLN1	LAMP3	SRP72
CHAMP1	CHST9	AP5B1	SDC2	BC069776	LCP2	DPP9
CHCHD4	CKMT1B	AP5Z1	C5orf28	PSMB6	LEAP2	ST5
CHGA	CLEC14A	APBA1	SLBP	MFAP3	LGI1	ZNF550
CHI3L2	CLIP4	APCDD1	DTX4	GPN3	LHFPL3-AS1	TAF13
CISH	CLLU1	APEX1	TJP3	RPL7L1	LIAS	EAF2
CLDN15	CLLU1OS	APOA1BP	TGFBR2	SMIM4	LIF	ERP44
CLDN9	CLPS	APOBEC3D	OR2C1	LCN10	LIG1	SENP5
CLIC3	CLPSL2	APOBEC3F	EED	MIR4657 /// PURB	LILRA1	JMY
CLINT1	CMBL	APOBEC3G	SEP15	PSMD1	LILRA2	RPP14
CLNS1A	CNDP2	APOC4-APOC2	SEC23B	PI4K2A	LILRA3	UBFD1
CLPTM1L	CNEP1R1	APOL1	PODNL1	UBE2T	LILRB2	TIMP3
CLU	CNGA4	APOL2	PJA2	ATP5G3	LINC00312	RAD1
CLUL1	CNTFR	APOL3	RBM23	RAPGEF3	LINC00511	GARS
CMBL	CNTN4	APOL4	TXNDC15	HRK	LINC00693	MED10
CMC4	CNTN5	APOPT1	BRD4	MGEA5	LINC00885	PCDHGC3
CMTM7	COPS3	APPL2	HDDC2	ESYT1	LINC00899	WDR55
CNDP1	COPS7A	AQP1	PDGFB	PRDM4	LINC00933	WARS
CNGB1	COQ10B	AQP12B	SCGN	ATIC	LINC00958	CEACAM1
CNN1	CORO2A	AQP5	INTS12	FTH1	LINC00964	ZNF70
CNNM3	CP	AQP9	COPZ1	RECK	LINC01091	COPA
CNNM4	CPA1	ARAP1	EPRS	ANKRD20A1 /// ANKRD20A11P /// ANKRD20A2 /// ANKRD20A3 /// ANKRD20A4 /// ANKRD20A5P /// ANKRD20A9P /// LOC102723891 /// LOC102725051	LINC01140	WNT4
CNOT10	CPB1	ARAP2	CUL3	EBNA1BP2 /// MIR6733	LIPA	DEDD2
CNPY1	CPQ	ARF5	HPRT1	ALDH1A1	LOC100130899	SETD1A
CNPY4	CRABP2	ARF6	PTPN3	NDUFS3 /// PTPMT1	LOC100289230	FAM177A1
CNTNAP2	CRAMP1L	ARHGAP10	DMXL1	BMS1P17 /// BMS1P18	LOC158435	ZNF229
COA4	CRISPLD1	ARHGAP26	CNBP	NCAPG2	LOC283038	SKIV2L
COBL	CRY1	ARHGAP31	HTR4	ADAMTS17	LOC389641	CDR2
COG2	CSPG5	ARHGDIB	SEMA7A	GTF2B	LOC728024	WIPI1
COL12A1	CTA-221G9.7	ARHGDIG	ZAP70	ARCN1	LOC93622	GOSR1
COL15A1	CTB-43E15.3	ARHGEF17	CPNE3	TIMM10	LOH12CR2	P4HB
COL1A1	CTC-332L22.1	ARHGEF35	TFR2	ATP6V1E1	LPCAT4	ZNF462
COL1A2	CTC-360G5.9	ARHGEF4	RAB1A	MCUR1	LRP8	GAK
COL22A1	CTC-534A2.2	ARHGEF5	PPP1R12A	MAK16	LTBP2	TRIM24
COL4A1	CTD-2003C8.2	ARHGEF9	MAGEA10	MKRN2	MADCAM1	CEP104
COL4A2	CTD-2037K23.2	ARID5A	SLMO2	PTTG1	MAFF	JADE2
COL6A6	CTD-2186M15.3	ARL16	PGRMC2	RAD51C	MAP2	PPRC1
COPE	CTD-2207P18.1	ARL4C	NAP1L2	MRPL51 /// SPTLC1	MAP3K3	HERC6
COPRS	CTD-2526A2.2	ARL5B	ASF1A	C21orf59	MED18	DCUN1D5
COQ10A	CTD-2651B20.1	ARL9	SERPINB13	ACVR2B	METTL1	PPP1R15A
COX18	CTD-3220F14.1	ARMCX5	PLEKHA4	SLC25A33	MFHAS1	KPNB1
CP	CTRC	ARNTL2	SELT	LZIC	MGAT2	PSMC4
CPT2	CYB5R1	ARRDC3	CALCOCO2	POLR2K	MIR497HG	TOX4
CPXM1	CYFIP2	ARSE	ARFGEF2	FANCM	MKRN2OS	COTL1
CREBBP	CYP4F12	ARSG	SUCLA2	CWC15	MKS1	METTL7A
CRHR1	CYP4F3	ARSJ	SUCLG2	PPP4R1L /// PPP4R1L	MMP19	PCMT1
CRIP3	CYTH3	ARSK	RBBP4	TUBA1C	MMP23B	SAR1A
CRLF1	CYYR1	ART3	UBL3	ENPP3	MNS1	CHST11
CROCC	DACH1	ARTN	RPL6	TPH1	MOXD1	BAP1
CROCCP2	DACH2	ARV1	UBR7	CCT5	MPZ	GOLGA2
CROT	DAGLA	AS3MT	OR10H1	RBBP8	MRO	VPS53
CSF1	DAXX	ASAH1	SSR1	PSMG1	MRPL36	PDX1
CSF2	DCDC1	ASB1	APBA2	TRAPPC2L	MRPL44	ELP2
CSF3	DCK	ASB2	PPP2CB	LINC00328	MSRA	SLC30A7
CSTB	DCSTAMP	ASB4	RFC3	NDUFAB1	MSS51	TMEM131L
CTBP1-AS2	DCTN3	ASB9	NPTN	KLC1	MTCL1	SLC10A7
CTGF	DDA1	ASIC3	VDAC1	LOC102723927	MTHFSD	DNAJC3
CTHRC1	DDX23	ASPHD2	CRY1	SCCPDH	MTRF1L	CEP95
CTNNBIP1	DEF6	ASTN2	ERN2	TRNP1	MUC20	IFT20
CTPS2	DEGS1	ATAD3C	RND2	NBPF10 /// NBPF12 /// NBPF14 /// NBPF15 /// NBPF20 /// NBPF8 /// NBPF9	MYOZ1	SLC39A7
CTSC	DGCR2	ATF3	PGRMC1	E2F3	NANOS2	SLC4A8
CTSF	DHX35	ATF7IP2	PEX11B	NPIPA1 /// NPIPA5 /// NPIPB15 /// NPIPB3 /// NPIPB6 /// PDXDC2P	NANS	ZFAND2A
CTSLP2	DIAPH1	ATG4C	CAT	CENPN	NAPEPLD	DPAGT1
CTSV	DIO1	ATL1	TTC37	LOC340090	NAPSA	FGFR1OP
CTSZ	DLEU2L	ATP11C	NT5M	MCHR1	NCAM2	CALCOCO1
CUL4A	DMTN	ATP13A4	DHRS7B	RTCB	NCF4	ALDH1L2
CWF19L2	DMWD	ATP1A1	BCL2L13	ZCCHC17	NCKAP1L	SRRT
CXCL1	DMXL1	ATP1A3	PRKACA	NANP	NCKAP5	TIMM44
CXCL2	DNAH12	ATP1B1	SARS	VARS2	NCSTN	IRGQ
CXCL3	DNAH5	ATP1B2	SAR1A	ZNF770	NDEL1	ZNF331
CXCL8	DNAH6	ATP2B3	UCHL1	LOC102724985 /// PDXDC1 /// PDXDC2P	NEK4	PITHD1
CXorf40A	DNAJB6	ATP4A	RSL24D1	ARL2BP	NIPAL3	DESI1
CXorf40B	DNAJC18	ATP5C1	ANP32E	DNTTIP2	NIPSNAP1	ZNF37A
CYB561D2	DNAJC27	ATP5D	SRPR	FUT11	NMNAT3	SNN
CYB5R2	DNTTIP2	ATP5G2	SBF1	UCHL3	NOP9	NAA35
CYB5RL	DOCK11	ATP5I	SEH1L	NBPF10 /// NBPF11 /// NBPF8	NPHP1	HM13
CYP24A1	DPEP1	ATP5L	TMED2	ACVR1B	NPM3	MAFA
CYP26B1	DPP6	ATP5O	ARGLU1	IRGQ	NPPA-AS1	KLHDC10
CYP2R1	DPPA3	ATP6AP1	KLHL28	TXNDC11	NPTXR	ZNF622
CYP39A1	DRP2	ATP6V0B	SMC3	C10orf10	NR2C2AP	TOMM5
CYP46A1	DSCAM	ATP6V1B2	CX3CL1	CCNH	NR4A2	EBLN3P
CYSRT1	DSCR8	ATP6V1H	MARS /// MIR6758	DBP	NRADDP	GJD2
DAAM1	DTWD1	ATP8B1	PSMB5	TSN	NRBF2	GCC1
DALRD3	DUSP12	ATPAF2	FANCC	PON1	NREP	TCAF1
DBNL	DYNC2LI1	ATPIF1	SH2B2	LOC100506076 /// LOC100506123	NRN1L	LLGL2
DBP	DZIP3	ATXN2	NUDT7	DENR	NRROS	TRIM27
DCAF17	E2F6	AUNIP	ZNF343	PPIH	ODC1	ZNF791
DCAF4	ECSIT	AURKB	DVL1	PTGR1	ODF3L2	SAR1B
DCAKD	EFCAB2	B2M	ZNF22	ATP6V1A	OR13J1	FXR2
DCLK3	EFCAB4B	B3GALNT1	IGF2BP2	PHACTR1	OR51E2	ZSCAN12P1
DCST1	EFS	B3GALT2	ARFGAP3	CCDC136	ORC6	SBDSP1
DCXR	EGF	B3GAT3	SRPRB	REXO2	OSCP1	ALG5
DDR1	EHD2	B3GNT1	MAP2K4	DDIT3	P2RY13	MEN1
DDX20	EID2	B3GNT2	C11orf58	VTI1B	P2RY8	PLEKHG3
DDX42	EID2B	B3GNT8	SSTR3	NDUFAF2	PAGE2	NDRG1
DDX51	EID3	B3GNT9	MON2	TMEM135	PAQR7	RECQL4
DEAF1	EIF1AD	B4GALNT2	PRKRA	ZNF823	PATZ1	UBIAD1
DEFB109P1	EIF3J-AS1	B4GALNT4	PLEKHF1	LINC00493	PBX2	DNTTIP1
DEFB4A	EIF4EBP1	B4GALT1	FGF17	PCDH10	PBXIP1	ARL1
DEPDC7	EIF5A2	B4GALT5	IL3RA	TMEM181	PCBP1-AS1	RASSF5
DHRS4-AS1	EMC4	B9D2	ERH	LOC100132207	PCED1A	ATF4
DIAPH2	ENPP5	BAALC	ENPP4	NTN1	PCNA	ZNF131
DICER1-AS1	EPG5	BAAT	SLC35G2	ABCD2	PCOLCE-AS1	DNAJB11
DIMT1	EPHA3	BACH1	GRIN1	PRDX1	PEX19	LARP1B
DIS3L	EPM2AIP1	BAG1	DCK	TUBB3	PGAP3	ACVR1B
DISP1	EPO	BAIAP2L1	KIFC1	CCNB1	PGM3	PNPLA2
DIXDC1	ERMAP	BAK1	CCT4	IGK /// IGKC	PGM5	HSP90B2P
DKC1	EXOC8	BANK1	LOC101928278	SYNJ2BP /// SYNJ2BP-COX16	PIFO	DDX21
DKFZp779M0652	EXOSC5	BATF2	ARPC1A	PSMD8	PIGA	ATP6V0E1
DLEU1	EXPH5	BATF3	ZNF473	EXOC8	PIGV	NOCT
DLGAP1-AS1	EYS	BAZ1A	DHX15	CLEC4F	PIK3C2B	DCAF13
DMGDH	F2R	BAZ2A	WFDC2	NMNAT1	PIP5K1A	GPD1
DMKN	FAM104A	BBC3	PSMA1	FAM20B	PITPNC1	AFTPH
DMRTA1	FAM105A	BBIP1	RNF113A	SENP7	PITRM1	TUSC2
DNAAF2	FAM124B	BBS7	TAF2	SSBP1	PITRM1-AS1	ARIH2
DNMT3B	FAM127C	BCAM	RPS2 /// SNORA64	PSMC3	PLCB2	ETV5
DOCK4	FAM150A	BCAR1	LARP1	ICT1	PLEKHG4B	SLC37A3
DOPEY2	FAM159B	BCAT2	EPX	COX6B1	PLIN2	CUEDC1
DPH5	FAM162A	BCHE	RPL4 /// SNORD16 /// SNORD18A /// SNORD18B /// SNORD18C	BLVRA	PMM2	IKBIP
DPY19L2	FAM163A	BCKDHB	PDCD10	PSMA5	POLDIP3	SMYD5
DPY19L2P1	FAM166B	BCL10	PFKM	USP49	POU2F3	MOGS
DPY19L3	FAM167A	BCL2	MRPL22	DYRK2	PPP1R15A	RPS6KC1
DSEL	FAM168B	BCL2A1	CHUK	CTCF	PPP1R26	FARSB
DSTYK	FAM171A2	BCL2L14	ALMS1	RAB5C	PPP1R32	ELMO1
DTX2P1-UPK3BP1-PMS2P11	FAM181B	BCL3	RPL10A	SVIP	PPT2	RIN2
DUSP10	FAM19A4	BCL6	GORASP2	PSME1	PRSS56	NADK2
DYNC2LI1	FAM200B	BCL7C	SHOC2	MKKS	PSMA3	SART1
DYX1C1	FAM210B	BCL9L	PCBP4	DYRK3	PSMC4	FNTA
EARS2	FAM212B	BCO2	E2F1	PROC	PTCD2	SLC7A6
EBI3	FAM215A	BDKRB1	LILRA4	N4BP2L1	PTGER1	WDR45B
EBPL	FAM21A	BDKRB2	ACP1	G6PD	PTGS2	ABLIM1
ECEL1	FAM222A	BEST1	NEBL	SMIM12	PXMP4	PYCR1
ECHDC1	FAM229B	BEST3	BAG2	FAM19A4	R3HDM2	RBM28
ECI2	FAM46C	BEST4	PNMA2	SUMF2	RALBP1	CBX4
EDA2R	FAM53B	BEX4	LOC732360 /// TDG	ENO1	RANBP10	PYGB
EDN2	FAM66E	BHLHE41	MPC2	MIR101-1 /// MIR3671	RAPGEF3	ROCK1P1
EDRF1	FAM72B	BICC1	PEF1	SRRM2	RARRES3	FICD
EFCAB7	FAM76A	BIN3	RPS6KC1	PTRH2	RASL11B	SBDS
EFEMP1	FAM76B	BIRC3	RECQL4	NEU1	RASSF1	IL20RA
EHHADH	FAM8A1	BIRC5	RRAGA	FBXO45	RBBP8	ZNF165
EIF2AK4	FAM90A1	BIRC7	RALGAPA1 /// RALGAPA1P	KIAA0391 /// PSMA6	RBM14	CCNK
EIF4A2	FAM92A1	BLMH	RNU86 /// RPL3 /// SNORD83B	MRPL15	RHOB	PPIE
EIF4EBP3	FASTKD3	BLNK	RWDD2A	CAPS	RNF135	MBD1
EIF4G3	FAXC	BLZF1	SERP1	PSMA7	RNF223	SLC2A4RG
ELK4	FBXL14	BMP2	SCP2	TP53INP2	RORC	C6orf62
ELMSAN1	FBXL5	BMP4	SRP54	SEC16B	RPARP-AS1	PLVAP
EMC3	FBXO10	BPGM	AZIN1	MTUS2-AS1	RSPH14	HYAL2
EMC7	FBXO11	BPHL	VLDLR	EIF2S2	RTTN	MAATS1
EMP1	FBXO27	BPIFA1	CLTCL1	ZNF189	SDHC	USP48
EMP3	FBXO43	BRD4	ARVCF	TUBB2A	SEC23B	SEC22A
ENC1	FBXO7	BSPRY	ZDHHC4	MKNK1	SEC24B-AS1	ARL2BP
ENDOD1	FBXW7	BST2	RHOA	CHKB-CPT1B /// CPT1B	SEC31B	OLFM2
ENO3	FCGR1B	BTBD2	AMZ2	MB21D2	SEC61A1	ETV1
ENPP5	FEM1A	BTBD6	TEX2	ATP6V1B2	SEMA4D	EBPL
ENTPD2	FFAR1	BTG1	DNASE2	MRPL36	SEPP1	STX18
EPAS1	FGF14-AS2	BTN2A1	CENPC	ID1	SEPSECS-AS1	CCDC9
EPB41L1	FGF14-IT1	BTN2A2	CPE	NPM3	SERPINA7	ASCC2
EPB41L4A	FHAD1	BTN3A1	CCDC15	NPIPA5 /// NPIPB3 /// NPIPB6 /// NPIPB8	SH2D4B	AP3D1
EPDR1	FHOD3	BTN3A2	TFB2M	AC004538.3 /// BC040327	SHH	DUSP12
EPHX2	FKBP5	BTN3A3	PHB	GREM1	SIGLEC10	CNP
EPOR	FLII	BTNL8	FAM208B	FLJ11292	SIRT1	RAB18
EPS8L3	FLT4	BUD31	RAD54L	LOC101928669 /// LOC644450	SLAMF7	ESCO1
ERAP1	FMNL2	BX088651.1	PRDX3	NUS1	SLC15A3	ATG4A
ERI2	FOCAD	BZW2	TMEM14B	RTFDC1	SLC1A3	TTC17
ERO1A	FOXO6	C10orf128	PRPSAP2	MRPL21	SLC22A18AS	SEC61A1
ESYT1	FOXRED2	C10orf32	RAB6A /// WTH3DI	DNAJC8	SLC25A20	CAMLG
ETV3	FRZB	C11orf1	EAPP	TIMM8A	SLC25A21-AS1	MAF1
EXD2	FSBP	C11orf24	ERGIC2	ANKRD53	SLC26A7	STK40
EXOC3L4	FSIP2	C11orf31	RBM7	CELF5	SLC33A1	TRMT6
EXOSC8	FTH1	C11orf74	RBM39	LOC399491	SLC35E2	HLA-E
EYA2	GABARAPL1	C11orf83	KATNB1	OSGIN2	SLC46A3	YPEL4
EZH1	GABPB2	C11orf92	SNX24	RP11-490G2.2	SLC7A11	PRKAR2A
F12	GANC	C11orf93	RHEB	CACYBP	SLC7A5P1	SAE1
F2R	GATA4	C11orf95	PYY2	HSPE1	SLC7A5P2	ZNF222
FAAH	GATS	C12orf10	TNFRSF13B	SAGE1	SMARCD3	SEC23IP
FAM104B	GBA	C12orf74	PSMC3	PDCD5	SNHG1	AEN
FAM110B	GC	C12orf75	KIR3DS1	GRM1	SNRPA1	ZNF587
FAM110C	GCH1	C14orf105	TVP23B	PBXIP1	SNX20	ATP2A3
FAM117B	GDF11	C14orf37	CUL5	NDUFAF4	SPAG8	RNF40
FAM120B	GFOD1	C14orf80	ADSS	MZT1	SPATA17	ELOVL5
FAM122C	GGA2	C14orf93	ZNF646	UQCR10	SPATA32	DCUN1D3
FAM133CP	GINS2	C15orf27	SDHB	PPM1N	SPEF2	L3MBTL2
FAM136A	GJA3	C15orf48	HAUS2	FAM162A	SPIRE1	ATXN7L3
FAM156A	GJD2	C15orf52	CYP2C8	TMEM65	SPRED2	LSAMP
FAM168A	GJD3	C15orf54	LOC101928747 /// RBMX /// SNORD61	C14orf37	SQSTM1	CEP76
FAM172A	GLP2R	C15orf59	CYC1	MRPL13	SRP14-AS1	COG1
FAM182B	GLT8D2	C16orf46	TNNI2	IGKC	SSTR5-AS1	ZXDC
FAM198B	GNA12	C16orf59	GJC2	ACTRT3	ST3GAL4-AS1	PLCG1
FAM19A4	GNAI1	C16orf80	OSTM1	PLGLB1 /// PLGLB2	STAC3	EDC3
FAM217B	GNAI2	C16orf95	TBPL1	SNRPD1	STARD4-AS1	UBTF
FAM220A	GNAO1	C17orf76-AS1	DCAF15	CENPW	STC2	ANKRD42
FAM24B	GNG10	C17orf89	CRYBB3	IQGAP1	STPG1	RELA
FAM35A	GNG5	C17orf96	ENOPH1	TECPR1	STX6	FAM160A2
FAM53B	GOLGA6C	C18orf32	PSMB7	RNASEH1	SUFU	TFG
FAM66A	GOLGA8G	C18orf8	CLNS1A	TUBB	SUMF2	SHMT2
FAM86B1	GOLGA8M	C19orf48	NUP205	GLO1	SUMO1P1	LOC107105282
FAM86DP	GPCPD1	C19orf66	SIGLEC7	SNRPB2	SUN1	MEIS1
FAM95B1	GPM6A	C1GALT1C1	FBL	LINC00475	SUV39H1	H3F3AP4
FARP2	GPR113	C1orf127	MFF	SMAD7	SYNGR1	KRT10
FBLN1	GPR119	C1orf158	PRKAG1	TFRC	TBC1D13	SCML1
FCAMR	GPR125	C1orf159	SUN1	TUBB4B	TBL2	FBXO25
FCER2	GPR142	C1orf192	PCNP	TMEM242	TCTEX1D2	VWA1
FCMR	GPR150	C1orf198	POU5F1 /// POU5F1B /// POU5F1P3 /// POU5F1P4	HAT1	TFDP2	WDR24
FDXR	GPR157	C1orf204	MUSK	PANX1	TGM1	ACBD3
FERMT3	GPR27	C1orf213	C5orf66	LINC00621	TMCO3	ARHGEF3
FEZ1	GPR52	C1orf227	HCRP1	CLDN12	TMEM147-AS1	ACLY
FGF11	GPR64	C1orf229	DNAAF1	DBH-AS1	TMEM218	RHOQ
FGF2	GPR75	C1orf233	CMKLR1	AP1AR	TMEM39A	TBC1D24
FGF9	GPR98	C1orf35	HNRNPH3	PARS2	TMEM8B	QRICH1
FGR	GPT2	C1orf50	MAPRE3	COX17 /// POPDC2	TMEM91	UBA5
FHOD1	GRB10	C1orf61	CNIH1	PSMC4	TOB1-AS1	MMRN1
FHOD3	GRHL2	C1orf85	WIPF1	FLJ38379	TOLLIP-AS1	CWC25
FIBIN	GRK4	C1QB	HMGCR	LOC692247	TP53TG3C	ZNF526
FKBP10	GSE1	C1QL4	MPP6	HSPBAP1	TPTE2	CXXC5
FKBP7	GTF2A2	C1QTNF1	FKBP10	RFC5	TPTE2P5	UBR7
FKBP9	GTF3C4	C1QTNF5	CCNG1	ENOX2	TRIM16	POLR3A
FKBP9P1	GYG1	C1R	LETMD1	KCNN3	TRIM16L	TRMT1
FLJ16779	GYS2	C1RL	EMC7	SNRPD3	TRMT6	YY1
FLNC	GZF1	C1S	CALU	HLA-DPB2	TRPV3	RAB5A
FLT3LG	H2AFV	C20orf112	AIPL1	SEC23B	TSC22D2	TGDS
FMO1	H2AFY	C20orf141	RNGTT	LOC101928519	TTC31	ZNRD2
FMO3	HACE1	C20orf195	PPP3CC	TUBG1	TTC32	CD82
FNDC3B	HBA1	C20orf197	RPL7A /// SNORD24 /// SNORD36A /// SNORD36B	LOC101927359	TTC39B	BMP5
FOLR1	HBA2	C20orf27	PCDH1	MTMR9LP	TTC41P	POLR2C
FOXJ2	HCN4	C21orf33	DHRS7	POU6F2	TUBB6	ANP32A
FOXO1	HDGFRP3	C22orf29	CKLF	MIR133A1HG	TXNRD1	LINC00261
FREM1	HDHD1	C2CD4A	SCG5	GOLGA6L4 /// GOLGA6L5P /// GOLGA6L9 /// LOC102724093	UAP1	CNOT10
FRMD3	HEPACAM2	C2CD4B	TMEM135	LSM2	UBXN8	DPH7
FRZB	HERC3	C2CD4D	FAM106A	COL27A1	VCP	SLC30A5
FSCN1	HEY1	C2orf27B	ZZZ3	EGFEM1P	VPS37D	ACP1
FUCA2	HHAT	C2orf72	IRF7	PTPN11	VPS52	INPP5K
FUK	HIGD1B	C2orf81	NDUFB8	NDUFB3	VTI1A	FAM156B
FUNDC1	HIST3H2A	C2orf88	CREG1	ADSL	WARS	NOC4L
FUOM	HLA-DMB	C3orf18	SLC25A11	RAB21	WASH5P	MAGOH
FUT1	HLA-DRA	C3orf38	PRIM1	ZNF259P1 /// ZPR1	WDR63	MTOR
FZD1	HLA-G	C4orf19	NME1	SF3B5	WDR88	EIF2AK3
G0S2	HLF	C4orf27	PGD	FRAS1	XPC	ZNF384
G6PC2	HOPX	C4orf32	LTN1	CYCS	YWHAH	ELMSAN1
G6PD	HOXA1	C5	PPP2CA	EXOC6	ZBED5-AS1	ZNF805
GABRE	HOXB2	C5orf15	ME2	RFC4	ZBTB21	STT3A
GADD45A	HOXB3	C5orf27	MTPAP	FLJ33534	ZBTB49	SMAD7
GALNS	HOXD3	C5orf30	CYP21A1P /// CYP21A2	DYNLT3	ZCCHC4	GRPEL2
GALNT12	HPCAL1	C5orf46	GNAS	RP11-182L21.5	ZMYM3	WDR74
GALNT4	HPD	C5orf56	COPA	COX7B	ZNF135	SEL1L
GAMT	HPDL	C5orf63	TAS2R9	ZNF106	ZNF165	ESRP1
GAPDH	HPSE	C6orf106	RPL7	DERA	ZNF205-AS1	DCAF10
GAS1	HRH4	C6orf123	OAT	CKB	ZNF252P-AS1	CHD1
GATAD1	HRNR	C6orf136	MTMR6	PGD	ZNF280A	LRRC47
GATC	HS6ST1	C6orf203	LIPT1	AGBL2	ZNF383	MACO1
GBAS	HSCB	C6orf52	LENEP	BZW1	ZNF404	SLC16A2
GBE1	HSF2	C6orf57	MTO1	UMPS	ZNF487	TMF1
GCLM	HSF5	C7orf10	STARD13	HEXIM1	ZNF526	ZNF664
GDF6	HSPA14	C7orf41	SLC22A2	DCAF13	ZNF571-AS1	GPAT3
GEMIN5	HSPB11	C7orf49	GATC /// SRSF9	ISG20L2	ZNF691	TOPBP1
GEMIN6	IDI2	C8orf4	WDYHV1	WDR3	ZNF763	SNHG8
GEMIN8	IER3IP1	C8orf47	SNX4	CHP1	ZNF85	TMED2
GGCT	IFITM2	C8orf49	GFER	LOC101929760	ZNF862	SNIP1
GK	IGFBPL1	C9	TMED7 /// TMED7-TICAM2	RABIF	ZSCAN12P1	DPM1
GK3P	IGFL3	C9orf116	PRKAR1AP /// PRKAR1AP	BTF3P12 /// BTF3P12		WSB2
GLIPR1	IGSF1	C9orf40	WNK1	RTN4IP1		CASR
GLRX	IGSF21	C9orf96	ADIPOR2	ANP32E		ERCC5
GLS2	IGSF9	CA8	CASZ1	CDV3		PIAS3
GM2A	IKZF5	CACFD1	RPL12	SNX12		NANS
GMPPB	IL10RB	CACNA1A	BMP10	MRPL45		AKT1S1
GNGT2	IL32	CACNA1D	BEX1	GEMIN6		TAF1D
GNRH1	IL6R	CACNB3	MEAF6	POLR2G		COA7
GOLGA6L9	ILF3-AS1	CALCOCO2	MDH2	XRCC6		DIABLO
GOLGA8CP	INCA1	CALHM2	WISP2	DNAJC9-AS1		AMPH
GOLGA8G	INF2	CALML4	NEFM	OPHN1		TLE3
GP6	ING2	CAMK2G	STMN2	RP13-20L14.1		MGST2
GPC3	INSM1	CAMK2N1	FLJ11710	SMAP1		CCDC113
GPN1	IP6K1	CAMKMT	GNL3 /// SNORD19B	MRPL27		RNASEH1
GPR155	IPPK	CAMLG	RABGGTB /// SNORD45A /// SNORD45B /// SNORD45C	IGF2 /// INS-IGF2		IPO4
GPR37	IQSEC1	CAMSAP3	DCTN3	SOCS5		MIGA1
GPR84	ISCA1	CAPN13	GATA1	CAB39		THBS1
GRAMD3	ITFG1	CAPN2	SEC14L4	DPH3		ATG3
GRAMD4	ITGA1	CAPN6	CD164	HRK /// LOC283454		ARFGAP1
GREM1	ITGAM	CAPN9	CTBP2	CISD1		PSMD5
GRID1	JADE1	CAPS	PLXNA1	LOC101927830 /// TMLHE-AS1		GBF1
GRIK1-AS2	JPH4	CAPSL	ALDH4A1	PRDX6		C22orf42
GRIP2	KANSL1L	CARD6	RPL30	ADK		FBXO33
GRK6	KBTBD11	CARHSP1	CLCN3	TALDO1		NUS1
GSTA4	KBTBD3	CASP1	SLC30A1	TCTEX1D1		SLC35B1
GSTM2	KBTBD4	CASP10	TMEM165	MIR631 /// NEIL1		MKNK2
GSTO2	KCNA5	CASP4	CRYGC	PHYKPL		KLHDC2
GTF2E2	KCNC2	CASP5	ZIC1	ZNF585A		APBB3
GTF2H5	KCNG3	CASP6	CD248	TDRD6		NSUN2
GTF2IRD2	KCNMB4	CASP7	CAPRIN1	COX6C		RABGEF1
GTF3A	KCNT2	CASR	SKIV2L2	MIR6845 /// NRBP2		ERICH5
GTF3C3	KCTD14	CASZ1	MTX2	ENY2		RAB31
GUF1	KCTD5	CAT	RNF13	ATP2C2		SBF1
HABP4	KCTD6	CATSPER1	RAPGEF3	PVRL3		ZNF827
HAS2	KDELC2	CBR3	RIOK2	ANXA2 /// NHP2L1		GM2A
HAS2-AS1	KIAA0895	CBX1	SEC23IP	DDX21		ID4
HAS3	KIAA1109	CBX2	PSMD5	LOC101926951 /// PCDH20		PES1
HAUS1	KIAA1257	CBX6	PAFAH1B1	GLB1L3		PPIL6
HAUS4	KIAA1324	CBX8	KIFAP3	FASTKD2		MAGT1
HCK	KIAA1328	CC2D2A	ABCE1	NRG1-IT1		LOC642366
HDDC2	KIAA1456	CCAT1	IDH3A	NDC1		PARP2
HEATR6	KIAA1551	CCDC102B	YTHDF3	EMC7		PKM
HECTD1	KIF3C	CCDC107	LMBR1L	PPA1		REEP4
HEMK1	KLHDC8A	CCDC108	UNC93B1	SNRPE		EIF1
HEPH	KLHL15	CCDC110	EXD3	LINC01004		NUP58
HEXB	KLHL40	CCDC125	RAB14	MYH14		FBXO8
HGSNAT	KLHL41	CCDC127	AGPAT5	FAM98B		RINT1
HHAT	KLHL42	CCDC147	CTR9	NME1		SEC22B2P
HIBADH	KLK1	CCDC148	KCNA10	TACO1		SEC22B3P
HIBCH	KNDC1	CCDC151	BTK	PPIL2		PLPP5
HIF1A	KPNA5	CCDC152	EEF1B2 /// SNORA41	ATG16L2		PELO
HILPDA	KRBOX4	CCDC24	GLI1	HSPA4		EDA2R
HIST1H2AC	KRT10	CCDC28B	SH3TC2	TTI1		C1QL1
HIST1H2BC	KRT15	CCDC41	GLO1	NOP9		PLEKHA6
HIST2H2AA4	KSR2	CCDC57	C12orf5	HNRNPH1		GOLGA1
HIST2H2AC	L1CAM	CCDC68	POLE3	SSSCA1		GPN2
HIST2H3A	LAMP1	CCDC71L	PARP2	RPP38		CFAP44
HIST2H4B	LAMP3	CCDC74A	C16orf80	BIVM		SMIM14
HK2	LAMP5	CCDC81	AP5M1	AX747135 /// RP11-863K10.7		PLK2
HKR1	LAMTOR1	CCDC85B	ARHGEF1 /// LOC100505585	TCP11L1		TRERF1
HLA-DQB1	LARP7	CCDC85C	CYP2B6 /// CYP2B7P	KCTD5		PUS1
HLA-DRA	LDB2	CCDC86	SLC45A2	PSMD12		DPYSL3
HLA-DRB5	LDLRAD3	CCL2	TOM1L1	CDIPT		NAV1
HLA-J	LEPREL4	CCL22	AK6	MYCN		CCDC174
HMCN1	LGALS3	CCL3	PNMA3	SCOC		COPS3
HMGB2	LGALS7B	CCL3L1	DHX35	C19orf53		ISCU
HMGN3	LHX6	CCL3L3	ENTPD3	POLA2		BCL2L1
HNRNPC	LIMS2	CCL4	RNF138	CYP39A1		ALG2
HPD	LINC00229	CCL4L1	ACAD8	BLVRB		CARS
HSD11B1	LINC00271	CCL5	ACADM	LGALS3BP		MIA3
HSP90B1	LINC00312	CCL7	ZBTB7A	LOC101929777 /// WNT3		LAMA5
HTR3A	LINC00441	CCL8	COPS5	MRPS28		EIF1AD
HUNK	LINC00461	CCNA1	SERINC1	GUSBP11		CDKN1C
ICAM1	LINC00511	CCNB1IP1	RAB6A /// RAB6C /// WTH3DI	PGAM1		COX7A2L
ICAM4	LINC00526	CCNI2	PRDM2	PSMD14		IMPAD1
ID1	LINC00574	CCNJL	SGPL1	DUSP16		PDIA4
IDH1	LINC00632	CCRN4L	MANF	BTBD19		RNMT
IDO2	LINC00643	CCT3	CLIP2	RP11-278J20.2		BOD1
IER3	LINC00663	CD163	TAPT1	PAK1IP1		URB1
IFNAR2	LINC00665	CD164L2	PSMD10	AK6		NEO1
IFNGR1	LINC00683	CD180	PAX9	IARS2		LOC100419583
IFT172	LINC00694	CD248	KCNJ9	KCNIP2		CDC23
IFT46	LINC00870	CD274	OSBPL8	MRPL30		NSMF
IFT74	LINC00877	CD2AP	TRMT11	NUMBL		RNF41
IGFBP3	LINC00910	CD36	LGR4	TERF2		USP14
IGFLR1	LINC00925	CD38	UBA5	SLC25A4		TNFRSF21
IKBKAP	LINC00948	CD40	PSMD8	RGS16		ZNF275
IKBKE	LINC00960	CD46	KCTD3	PRRT2		TBC1D23
IL12RB1	LINC00963	CD47	PNOC	BRWD1		TMEM19
IL15RA	LINC01018	CD48	C1QTNF1	ARGLU1		GFPT1
IL17C	LINC01071	CD6	MRPS22	SAP18		TBL2
IL17D	LINC01108	CD68	AMD1	COLCA1		RIOK2
IL17RA	LINC01116	CD7	ZNF408	MRPL42		TMEM208
IL18R1	LINC01138	CD74	MAGEB2	HNRNPF		ELP5
IL1A	LINC01139	CD80	ARPP19	PTP4A2		H2AFY
IL1B	LINC01155	CD82	HSPA14	THBS3		SEMA4B
IL1RN	LINGO2	CD83	ZNF587	MRPS18B		TSR1
IL23A	LMO2	CD9	FUT3	INSM2		SAMD11
IL24	LOH12CR2	CD99L2	JUND	ZNF354C		LPCAT3
IL27RA	LPPR4	CDC16	MLLT4-AS1	CCT6P1 /// CCT6P3		IER3IP1
IL36G	LRG1	CDC25B	ATP6V1B2	WDPCP		MBD4
IL36RN	LRP3	CDC42BPG	SLC25A32	DAD1		TMEM150C
IL3RA	LRRC37A	CDC42EP2	AK4 /// LOC100507855	AF520793		BORA
IL4I1	LRRC37A2	CDC42SE2	ALOX15B	PSMB2		PRKAR2B
IL5RA	LRRC37B	CDC7	FBXO11	UTF1		PLEKHA3
IL6	LRRC42	CDCA3	IMPA1	TMEM261		CHAC1
IL7	LRRC4C	CDH24	PTEN /// PTENP1	POMP		ZNF202
INHBA	LRRTM4	CDH5	PPP1R13L	EXPH5		DYNLL2
INSL3	LRTOMT	CDH6	TGFB1	PDRG1		DLL4
INTS3	LSP1	CDHR2	ACSF2	ARL1		GLRX5
INTS6	LUZP2	CDIP1	MIR636 /// SRSF2	NSUN5P1 /// NSUN5P2		EMD
INTS9	LY6H	CDK10	DYNC1I1	NDUFS6		LINC00888
IP6K2	LYPD3	CDK2AP1	CDH8	ANKRD20A11P		YKT6
IPO5	MAFA	CDK5	FBXW12	ABCD4		UPF2
IPP	MAFB	CDKL2	SIX1	PPP1R3D		CEP68
IQCC	MAGED1	CDKN2AIPNL	CST4	UBE3A		PALM2-AKAP2
IRAK2	MAGED2	CDKN2B	GMFB	RPAP3		SLC25A44
IRAK3	MAGEF1	CDR2L	GIN1	RNF115		YIPF5
IRF5	MAGEH1	CDS1	TNFSF14	CREBRF		MAGEH1
ISCA2	MAN2B2	CEACAM1	HMG20A	TMEM41A		SIX2
ISLR	MANBAL	CEACAM3	MINPP1	KIZ		SEC22B
ITFG1	MAP1LC3C	CEBPA	COL2A1	NBPF10 /// NBPF11 /// NBPF12 /// NBPF14 /// NBPF15 /// NBPF20 /// NBPF8 /// NBPF9		CTDP1
ITGA7	MAP3K15	CEBPB	REXO2	EMG1		INO80
ITPRIPL2	MAP3K5	CEBPD	LCK	PRKAG2		MZT1
ITSN2	MAP7D1	CEL	CADM3-AS1	AC005306.3		YARS
IZUMO4	MAP7D2	CELA3A	HERC2 /// HERC2P10 /// LOC101929047 /// LOC101929832	PHIP		LTV1
JAK3	MAPK1IP1L	CELSR2	STAT5A	ZCRB1		BRPF3
KANSL1	MAPKAPK5	CEMP1	GLT8D1	FRG1 /// LOC100289097 /// LOC101930278 /// LOC101930531		DERL2
KAT2A	MARCH8	CENPBD1	PDHX	MPV17L2		TAX1BP1
KCNAB1	MB21D1	CENPE	CNGB1	TTC9C		RSL24D1
KCND1	MB21D2	CENPJ	NOL11	CLDN7		TMEM173
KCNG2	MBD4	CENPQ	SOGA1	EIF3M		PREB
KCTD10	MBIP	CENPV	RAB28	GTF2E1		PSMD8
KDELC1	MBOAT2	CEP41	MAN1A1	MIPEP		PHKG2
KDM1B	MCOLN1	CEP55	AC003989.4	MREG		EIF3G
KEAP1	MEAF6	CERK	KIAA1614	PRKAB2		EXD2
KHK	MED27	CERS1	TSNAXIP1	TMEM185B		ARPIN-AP3S2
KIAA0101	MED4	CERS4	MAK16	RASGEF1A		LRIF1
KIAA0319L	MEX3B	CFB	CCL7	NAA50		TBC1D10B
KIAA0753	MFSD2A	CFH	BCLAF1	PPFIBP1		DHRS2
KIAA1549L	MFSD4	CFHR1	S100A1	CLEC18A /// CLEC18C		PNRC1
KIAA1804	MGAT4C	CFLAR	PVRL2	LINC01089		SLCO3A1
KIFC2	MICA	CFTR	TRIM62	SS18L2		TFB2M
KIT	MIR4458HG	CGREF1	LPP	SLC33A1		ZNF639
KITLG	MKRN3	CHAD	TUBB	TXNDC9		BCKDHA
KLF12	MMP28	CHCHD10	MED6	SHFM1		LIG1
KLHL12	MNS1	CHCHD6	HYAL3	CRIP3		OSBP
KMT5C	MOAP1	CHD7	PTGER1	SV2B		RBM8A
KRT79	MOB1B	CHI3L2	ZBTB1	SAFB		ECE1
KYNU	MOGAT1	CHID1	BST2	LOC100506325		NKIRAS2
L3MBTL1	MORF4L1	CHMP4B	MAPRE2	TMEM183A /// TMEM183B		BUD31
LACTB2	MORN2	CHMP5	KCNJ13	CKS2		RASD1
LAMB1	MPC1	CHN1	CBX8	SARS		MRPL3
LAMB3	MPC2	CHPF	DDX1	NDUFA6		SEC24A
LARS	MPPED2	CHRM3	PSMD7	NAIF1		RBM39
LBH	MR1	CHRNA4	BMPR1A	ACTG1P4 /// AMY2B /// RNPC3		ING1
LDB3	MRAP2	CHST14	CHMP1A	ZNF689		SLC25A32
LDLR	MRPS6	CHST2	OXA1L	ATF4		CNOT2
LEAP2	MTERFD2	CHST8	TSN	BUD31		CADM1
LGALSL	MTFP1	CHST9	CEP63	AIFM3		ZCCHC17
LHX5	MTHFD2L	CIB1	PANK3	ANKZF1		LRRC20
LIAS	MTPAP	CIITA	ADAM15	RP11-469M7.1		BMPR2
LIF	MTURN	CINP	DYNC1LI1	TWISTNB		ARHGAP24
LILRA5	MUC12	CIR1	GPX7	SNORA29 /// TCP1		FAM98A
LIMCH1	MVB12B	CISD1	FASTKD2	NGDN		CHCHD7
LINC00176	MXRA7	CISD3	MPC1	STX8		PRPF19
LINC00339	MYBL1	CKAP4	PRKRIR	KPNA1		RER1
LINC00473	MYBPHL	CKAP5	NDE1	SLC2A2		LAMTOR3
LINC00602	MYEF2	CKB	ZFR	FAM166A		YWHAH
LINC00930	MYH4	CLC	ARAP3	MSANTD2		SLC44A3
LINC01106	MYLIP	CLCF1	HSP90B1 /// MIR3652	EXOC5		SF1
LIPA	MYO1D	CLCN4	CLP1	ALK		SIX3-AS1
LIPG	MYSM1	CLCN7	MYH13	TAGLN2		COPG1
LMTK3	MYT1L	CLDN10	UFM1	CHAC2		TM9SF2
LMX1A	NAA20	CLDN11	EHD2	LINC00537		RNF145
LOC100289673	NAAA	CLDN14	LARP4	SLC35B4		MCFD2
LOC730101	NABP1	CLDN18	LILRA3	VTI1A		SSR3
LOC81691	NAF1	CLDN6	C6orf211	UFD1L		DNAJB9
LOH12CR2	NALCN	CLDN9	ARID1A	RRAGA		C9orf72
LRFN4	NANOS1	CLDND2	ZDHHC6	KIAA1211L		DYNC1LI2
LRPPRC	NANP	CLEC2D	PTCD3	UQCRFS1		BBS9
LRRC20	NAPB	CLEC4D	SIM2	TXNDC17		STAM
LRRC27	NBPF24	CLIC1	CHIA	RAD51-AS1		PLCH1
LRRC32	NCAM1	CLIC2	GCSH /// LOC101060817	LINC00184		THOC3
LRRC8D	NCAPD3	CLIC5	MAP7	GNG7		SORBS2
LRRN1	NDFIP1	CLIP3	TCF7	CNP		IFIT1
LSG1	NDNL2	CLSTN1	BDKRB2	USP4		CLUH
LTBP1	NDUFA5	CLSTN2	SLC12A7	DPH1 /// OVCA2		PIKFYVE
LTBP2	NEGR1	CLTA	HNF4A	MRPS16		GLUL
LYN	NEIL2	CLUL1	MED17	MUM1		WDPCP
LYRM1	NEURL1	CMBL	ZSWIM1	NSA2		ATP6V0A2
MACROD2	NEUROD1	CMPK2	EIF2B1	WDYHV1		DCAF1
MAFF	NGFR	CMTM4	UBE2G1	NDUFAF1		TRIM4
MAGEE1	NHEJ1	CMTM5	RDX	HBS1L		RAP1GAP2
MAN1A1	NHLRC4	CMTM6	ABCB1 /// ABCB4	EXOSC9		EFHD2
MANBA	NIPSNAP3B	CMTM8	OGT	RP11-124L9.5		UBE2M
MAOA	NKAP	CNFN	IRF5	RP11-324L17.1		FAM227A
MAP2K3	NKX6-3	CNGA1	SREK1	GLB1L2		GDAP2
MAP2K6	NLRP6	CNIH3	CD52	CLIC1		ARL4A
MAP3K8	NOL9	CNNM3	RAB2A	AGMAT		COX19
MARCO	NOX4	CNP	TMEM9B	ELF2		ZNF618
MAST4	NPTX2	CNPY4	CYTH3	TARBP1		CLCN6
MATN2	NPTXR	CNTFR	PREPL	ANKRD18A		HIBADH
MBIP	NR5A2	CNTN1	ADNP	TXNRD1		CYP2R1
MCAM	NREP	CNTN3	TRANK1	FAM179A		SRRD
MCEE	NRG1	CNTROB	DAD1	STL		SNX5
MCM6	NRG4	COA3	SCFD1	ARID5A		SYAP1
MDH2	NRK	COG4	CYP3A5	AK6 /// TAF9		DDA1
MED18	NRL	COL15A1	COG5	LOC101930075 /// LOC102724993 /// NPIPA1 /// NPIPA2 /// NPIPA3 /// NPIPA5 /// NPIPA7 /// NPIPA8 /// PKD1P1		EPSTI1
MEF2C	NRSN1	COL8A2	RWDD1	MRPL22		ALDH6A1
METTL5	NRXN1	COLEC11	PPT1	NBPF1		NDST1
METTL7A	NSG1	COLGALT1	EFR3B	NHP2P2 /// NHP2P2		ZNF667
METTL9	NTN3	COLGALT2	UFC1	MIR6834 /// PFDN6		THAP9-AS1
MFGE8	NTNG2	COLQ	TSPYL1	XRCC5		ARL14EP
MFSD2A	NUAK1	COMT	CCSER2	AC005606.14		SUPT6H
MGARP	NUCKS1	COPG2	POLR2B	LOC441124		CHDH
MGC12916	NUDT11	COPRS	PLEKHA6	USP14		SDE2
MGME1	NUDT16	COPS3	KCNJ10	VBP1		MED8
MGP	NUDT19	COPZ2	SUGP1	DYNLT1		SMG5
MICB	NUFIP1	COQ10A	NRBF2	C7orf63		TIMM10B
MIF4GD	NWD1	COQ3	PANK4	NTN5		RTRAF
MIOS	NYNRIN	CORO6	VAMP7	LOC101926967		SDAD1
MIR146A	OAT	COX4I1	LECT1	MAGED4 /// MAGED4B /// SNORA11D /// SNORA11E		SPATA2
MIR22HG	OAZ2	COX5A	CD46	LMBR1L		ESS2
MKS1	OCIAD1	COX6A2	LAT	CCDC180 /// LOC100499484-C9ORF174		ABHD5
MLNR	OCRL	CP	RPLP0	MED11		UAP1
MMP1	OLFML2A	CPLX1	ANP32D	LOC101930075 /// NPIPA1 /// NPIPA2 /// NPIPA3 /// NPIPA5 /// NPIPA7 /// NPIPA8 /// PKD1P1		PITPNM2
MN1	OLIG1	CPXM1	ALDH9A1	C2orf82		SLC30A4
MPL	OXA1L	CPXM2	PIP4K2C	EIF6		ISCA1
MPLKIP	OXGR1	CR1L	OR10H3	MRPL23		GOLGB1
MPP7	PACSIN2	CRCT1	SS18L1	AC073321.4		NOTCH3
MRGPRX3	PAPPA2	CREB3L4	CMAS	ESM1		XPOT
MROH6	PARD6G	CREBL2	CCZ1B	LOC102724483 /// PIGL		MAP3K6
MRPL14	PARVB	CRIPAK	DNAAF2	SEC23IP		MTA3
MRPL19	PCDHA7	CRLF1	NOD1	OXNAD1		CCSAP
MRPL24	PCDHB16	CRNDE	MRPL17	AQP6		ARHGAP39
MRPL30	PCDHB5	CROCC	TXNL1	EIF3I		PRPF18
MRPS27	PCDHB6	CROT	PCBP2	OAZ3		TMEM243
MRPS9	PCDHGA9	CRTAC1	DDX5 /// MIR3064 /// MIR5047	CEP72		ABCC8
MSC	PCDHGB2	CRTAP	CABP2	CXorf21		IFIT5
MSC-AS1	PCDHGC4	CRYAB	MUC2	METTL3		TMEM198
MST1R	PCED1B	CRYM	MIR1236 /// NELFE	PNISR		HNF4A
MSTN	PCMTD2	CRYZ	MARCH8	CCNL2		DDX18
MSX2	PCYOX1L	CSE1L	CLCNKA /// CLCNKB	DSTN		COL6A1
MTAP	PDE4D	CSF1	NEK7	SNORA72		N6AMT1
MTERF2	PDE6D	CSF2	ATF1	CPXM2		MRS2
MTERF3	PDLIM2	CSF2RB	TMEM140	MON1B		BHLHE40
MTFR1L	PDZD2	CSF3	RPS3A /// SNORD73A	ATP5C1		SYNPO
MTG2	PDZRN3	CSF3R	SEC24B	STAT4		C19orf47
MTIF3	PELI3	CSMD2	CHRNE	SIPA1L2		WDR43
MTPAP	PFDN1	CSRNP1	CCL25	TMEM91		SEPTIN8
MUL1	PFKFB2	CTA-126B4.7	KLHL9	VPS25		SEPHS2
MUSTN1	PFKM	CTAGE15	PIGP	TRAPPC2 /// TRAPPC2P1		GATAD2A
MXRA8	PFN2	CTAGE4	MYH8	AGAP11		B4GALNT3
MYO1B	PGBD3	CTAGE6	MED24	IDI2		WDR19
MYO1D	PGRMC1	CTAGE8	DERL2	MCM9		BHMT2
MYOZ1	PGS1	CTAGE9	COA1	ZNF692		DNAH5
N6AMT1	PHF7	CTB-31O20.2	CHGB	NDUFB4		C15orf48
NAAA	PHLDA2	CTB-31O20.9	CIC	PRSS50		CNTRL
NAB1	PI4K2A	CTB-43E15.3	SPI1	UBB		CLPP
NAMPT	PIANP	CTB-75G16.3	COPS6	LOC645513		ISOC2
NAPSA	PIGF	CTC-228N24.3	CYAT1	RPL24		HDAC1
NARS	PIGK	CTC-428G20.3	RTCB	NSUN5P1		RAB39B
NBEAL2	PIGP	CTC-462L7.1	SLC35E1	MAMDC4		ANKRD11
NBPF1	PIGX	CTC-527H23.3	SNX2	THADA		SYK
NBPF10	PIP5K1A	CTD-2001E22.2	COX7A2	COMT		TP53
NBPF11	PLA2G12B	CTD-2008P7.9	MRPL13	LLPH		LOC100630923
NBPF14	PLAGL2	CTD-2044J15.2	HSP90AB1	LINC01341		LYSMD3
NBPF15	PLEKHA6	CTD-2135D7.5	CREB3L2	HIGD1A		GET4
NBPF3	PLEKHS1	CTD-2139B15.2	KPNA3	EPHA7		INKA2
NCAM1	PLN	CTD-2162K18.3	COPS2	MCM2		POLR1B
NCF1	PLXDC2	CTD-2184D3.6	HSPA2	NCOA4		SELENOW
NCF1B	PNLIPRP3	CTD-2195M18.1	CMAHP	ADAM8		MRPL2
NCF1C	POLD4	CTD-2339F6.1	GIT1	APOOL		PSMD12
NCKAP5	POLR2C	CTD-2554C21.2	CPTP	SELK		PIP4P1
NCOA6	POLR2K	CTD-2561B21.11	TMPRSS5	CH25H		ZW10
NCSTN	POLR3F	CTD-2587H24.10	MAP4K3	RASEF		DYM
NDST1	POMZP3	CTD-2619J13.14	NR3C1	C3orf62 /// MIR4271		HCCS
NDUFV2	POU6F2	CTD-2619J13.17	SUPT4H1	PLXNB3		RAB36
NEK3	PPARGC1B	CTD-3193O13.11	LZTFL1	AK094644		RANBP10
NFATC3	PPFIBP2	CTGF	NBPF1	KIAA1524		SRP68
NFIA	PPIG	CTIF	ATP8B1	PCBP1		AOX1
NFKB1	PPM1D	CTNNBIP1	PYROXD1	TUBA4A		FOXO4
NFKB2	PPP1R13L	CTNNBL1	COPB2	EPHA5-AS1		GPANK1
NFKBIA	PPP1R14C	CTRC	ACTL8	OGFOD1		EIF3B
NFKBIZ	PPP1R21	CTSC	GPR124	RUSC1		EIF4H
NGF	PPP1R8	CTSD	RBM12B-AS1	PCYT1A		SYS1
NID1	PPY	CTSF	CNN1	DNAI2		TSC22D1
NIPSNAP1	PRCP	CTSH	SERHL /// SERHL2	ARPC4 /// ARPC4-TTLL3 /// TTLL3		ERG
NLN	PRKAR2B	CTSO	ANP32A	NUP155		SUCO
NMNAT1	PRKCD	CTSS	ARFGAP1	CHRNB1		UPRT
NMT2	PRKRA	CTU2	C22orf31	ENAH		KIAA1211L
NMUR2	PRLHR	CUEDC1	BLCAP	RP3-329A5.8		SORD
NOA1	PRMT5	CUEDC2	CD4	SRPRB		FOXK2
NOCT	PROC	CUL2	PLEKHG3	IGH /// IGHA1 /// IGHA2		AP5Z1
NOD2	PROS1	CUL4B	HSPA12A	TOMM34		CXorf40A
NOSTRIN	PRTFDC1	CUTA	MYO7A	NUDT5		USP37
NOV	PRUNE	CUZD1	PPBPP2	PDE4B		PACRGL
NPC2	PSAP	CWC15	CCDC87	RAB9A		SMAP1
NPHP1	PSEN2	CWC27	MAN1A2	SUZ12		CCZ1B
NPM3	PSIP1	CX3CL1	SMO	VWCE		LTN1
NPTXR	PSMB9	CXADR	ST3GAL4	SLC18A2		SPTY2D1
NQO1	PSME2	CXCL1	ZNF706	CLDN23		DNAJC10
NR1H3	PTCHD3	CXCL10	UBE2A	RSAD2		CDK13
NRBP2	PTPLAD1	CXCL11	PCBP1	GCOM1 /// MYZAP /// POLR2M		RARS2
NREP	PTPN1	CXCL16	RANBP2	FEN1		MDH1
NRF1	PTPN18	CXCL2	PDE9A	SLC24A2		NECAP1
NRG1	PTPRN2	CXCL3	SPRED2	TXN		MED26
NRG3	PTPRS	CXCL5	CDC37L1	CST7		ZNF770
NRN1	PUS10	CXCL6	MOG	EIF2S1		SDF2L1
NSMCE1	PWRN3	CXCL9	SIPA1	CCDC51		EPB41L4A-AS1
NSUN6	PYGO1	CXCR4	NDUFS3	LOC100652930 /// NPEPL1 /// STX16-NPEPL1		DNAAF5
NTAN1	PYURF	CXCR5	INCENP	ZMYND11		SLC35F6
NTM	QDPR	CXorf36	CDA	ANKRD33		UBE2J1
NTN5	QPCT	CXorf49	GPR21	DDX5 /// MIR3064 /// MIR5047		PDE9A
NUDT16P1	RAB12	CXorf49B	HNRNPH2 /// RPL36A-HNRNPH2	RET		TYW3
NUDT5	RAB1A	CYB561D2	CDK4	NUP88		SULF2
NXN	RAB3C	CYB5A	EIF4E	LRRC23 /// RPL13P5		COA8
OARD1	RAB3D	CYB5RL	EGOT	ZMAT2		TRMT61A
ODC1	RAB7L1	CYBRD1	ARPC5	MUC19		MLEC
ODF3B	RABL5	CYHR1	RPL23A /// SNORD42A	PABPN1		BRPF1
OGFRL1	RAC3	CYLD	HIST1H3E	LINC00260		ABI3
OGT	RAD54L	CYP21A2	API5	THOC1		NELFE
OLA1	RAE1	CYP24A1	WAC	ABCA6		PPAN-P2RY11
OLFM4	RALGPS1	CYP26B1	EIF1B	ECHDC2		EXOSC1
OPA3	RAP1GAP2	CYP2U1	LOC729966 /// PDE4C	ID4		AP1M1
OPCML	RASGEF1B	CYP39A1	PAPSS1	TRIM52		ARPIN
OR2A1	RASGRF1	CYP3A4	PLEKHF2	LOC101929465		APBA3
OR51E2	RASSF5	CYP3A5	UBE2Q1	IQSEC3		PRSS23
OSBP	RAVER2	CYR61	SEC13	EXOC7		DDX46
OSBPL1A	RBM48	CYS1	CAND1	MRPL35		REXO4
OSGEP	RBP4	CYSLTR2	ZCWPW1	RPL7AP71 /// RPL7AP71		PRICKLE2
OSGEPL1	RCAN3	CYTH3	MRPL49	CRIPAK		DNAJC9
OSM	RECK	DACT2	ATP11A	PRICKLE2		ZNF547
P2RY13	RET	DACT3	CROCCP3	OSTM1		GCK
PABPC1L	RFPL1	DALRD3	NCBP2	CNST		DERL3
PADI2	RFXAP	DANCR	SLC25A3	ABHD5		UTP25
PAK7	RGPD3	DAND5	CRH	ZFR2		RRN3
PALB2	RGPD4	DAO	SOX2	SHQ1		HDLBP
PANK1	RGPD8	DAPP1	SLC30A9	CMIP /// LOC100129617		GLT8D2
PAPD5	RGS2	DARS2	HLTF	ORMDL2		BAHCC1
PAPPA	RGS9	DBH	KCNQ1DN	DSCR3		SPATA17
PAPSS1	RHBDD2	DBN1	HIRA	SLBP		CERS2
PATZ1	RHBDL3	DBNDD1	UCHL5	ZNF831		PRKAB2
PAXIP1-AS1	RHOBTB3	DBP	ZNF696	ASXL1		CRELD2
PCBD1	RHOQ	DCAKD	CITED2	LCMT2		CHERP
PCDH15	RIMBP2	DCBLD2	PTDSS1	ACCS		ERLEC1
PCDH18	RIPK1	DCLK1	PVALB	IPO11 /// IPO11-LRRC70		LLGL1
PCGF6	RMDN2	DCLK3	SH3BP2	CHTF8		BLCAP
PCMTD1	RNF152	DCLRE1C	TDP2	RWDD2B		PTPRJ
PCYOX1L	RNF181	DCTN2	KRT33B	METTL2A /// METTL2B		LIN52
PDCD4	RNF4	DDAH1	ELL2P3 /// ELL2P3	TAF1A-AS1		MIEF1
PDCL	ROPN1	DDB2	MAFB	RP3-406P24.1		SPTBN2
PDCL3P4	RORB	DDC	SPC24	LOC100507520		TVP23C-CDRT4
PDE4B	RP11-1000B6.3	DDHD1	SRP9	STAU2		DHX57
PDE9A	RP11-1000B6.5	DDN	NTSR2	NXT2		F2RL3
PDGFRL	RP11-100G15.10	DDO	PVRIG	ECD		HS6ST1
PDZD11	RP11-101E14.2	DDR1	APOC1	RUVBL1		TOMM40
PEBP1	RP11-1094M14.11	DDX27	PAWR	KCNH8		MCPH1
PELI1	RP11-109D9.4	DDX42	ANKRD49	LOC101060179 /// PRDM11		MSTO2P
PEX1	RP11-111K18.2	DDX58	PML	UBE2L3		FUT8
PF4V1	RP11-1151B14.2	DDX60	EIF4H	AX747132 /// RP11-458D21.1 /// RP4-791M13.3		ABCB8
PFDN1	RP11-122K13.14	DEAF1	RFX5	MYL4		RBM47
PGAM4	RP11-129M6.1	DEFB4A	CCDC9	LOC101928669 /// LOC101930100 /// LOC644450		LOC652276
PGAP3	RP11-131K5.1	DEFB4B	TCEB3	TTC7B		FAF2
PGK1	RP11-158H5.7	DENND2C	GDI2	MAPKAP1		MAPK8
PGLYRP2	RP11-180P8.3	DENND5A	ELOVL5	MAP3K4		WRN
PGM2	RP11-182L21.6	DES	KIAA1654	CHMP3 /// RNF103 /// RNF103-CHMP3		PRELID1
PHF8	RP11-209K10.2	DESI1	KRT8P11 /// KRT8P11	DAP3		CYGB
PHLDB1	RP11-222K16.2	DFNB31	IGKC /// IGKV1-5 /// IGKV1-5 /// IGL@	SQSTM1		ARV1
PHYH	RP11-22L13.1	DGCR6L	GPATCH2	COA1		EPRS
PID1	RP11-247L20.4	DGKG	CCR5	DLAT		MYRIP
PIM2	RP11-268G13.1	DHRS11	ACAT1	WSB2		MIS12
PITPNA-AS1	RP11-271M24.2	DHRS4	CTF1	ACAT2		ODR4
PITPNC1	RP11-290F20.3	DHRS4-AS1	ALG9	GUSBP2		RAB3B
PITPNM3	RP11-293M10.5	DHRS4L2	BTBD3	HEXDC		MEST
PKM	RP11-2B6.3	DHRSX	PEG10	C5orf66		TTLL11
PLA2G12A	RP11-2E17.1	DHX58	OCM2	TRIP4		TPRG1L
PLAT	RP11-30K9.6	DIAPH1	TRADD	CAP1		TMEM64
PLAUR	RP11-317P15.5	DIRC1	LOC339166 /// WSCD1	LTB4R		RMDN3
PLCG1	RP11-31F15.2	DLEU1	MC1R	SCYL2		NR4A3
PLD2	RP11-326C3.13	DLL4	RPS3	LL22NC03-N14H11.1		COG5
PLD6	RP11-345J4.5	DMGDH	TOR1AIP1	IKBKAP		NCAPH2
PLEK2	RP11-347C12.10	DMPK	CD177	FGR		PLXND1
PLEKHM3	RP11-375B1.3	DMRTA2	HSPB6	CNTRL		HCFC1
PLPP3	RP11-381O7.3	DMTN	LANCL1	STEAP3		HIC1
PLSCR1	RP11-38P22.2	DNAI1	LRP1	DMTF1		EIF5
PML	RP11-419C23.1	DNAI2	ORC3	RSL1D1		C1orf52
POFUT1	RP11-423O2.5	DNAJA1	DLK1	GSTZ1		CXXC1
POLA2	RP11-42O15.3	DNAJC22	KCNH4	CSAD		OSER1
POLH	RP11-433J8.1	DNAJC4	SGMS1	OLIG1		NVL
POLR1B	RP11-466C23.4	DNAJC5	C6orf48	PLA1A		ZC3HAV1
POLR1D	RP11-472N13.2	DNAL4	PCNXL2	DHDDS		NLE1
POLR3GL	RP11-480D4.6	DNPEP	KRT20	EIF3H		AGO3
POMGNT2	RP11-480I12.7	DNPH1	RAD21	LAMTOR5		PPAT
POMT1	RP11-48G14.2	DOK4	ALG11 /// UTP14C	KCNH3		MRPL49
POU2F2	RP11-496B10.3	DPF1	MRPL39	RP11-710C12.1		KDR
PPFIBP2	RP11-498E2.7	DPH5	IDH3B	LOC101060604 /// SLC7A5P1 /// SLC7A5P2		ZNF529
PPIP5K2	RP11-502I4.3	DPP7	LOC101928625 /// MED21	LUC7L		CENPBD1P1
PPM1H	RP11-51J9.5	DPY19L2	PRRC2A	MTMR6		GPATCH1
PPP1R12B	RP11-521O16.2	DPY30	AGRN	ARMC10		GIPC1
PPP1R32	RP11-532F6.4	DPYD	TOB1	BAI3		CCDC59
PPP2R1B	RP11-533E19.5	DPYS	CXCR3	CCNY		YIPF2
PPP2R2D	RP11-543C4.1	DRAM1	DUX1 /// DUX3 /// DUX5	HMOX2		SPSB3
PPP2R5C	RP11-557C18.4	DRAXIN	MEST	mir-223		ALDOC
PRELP	RP11-563J2.2	DROSHA	FNBP4	ADAM23		EBNA1BP2
PRIM1	RP11-572M11.3	DSC2	C12orf29	CUBN		ARL4C
PRKAA2	RP11-573G6.10	DSCAM	SYDE1	OFD1		PCDH7
PRKAB2	RP11-61J19.4	DSCC1	MIER2	TM2D2		XYLT2
PRKAG1	RP11-622K12.1	DSE	PSMC2	LOC100506538		C11orf95
PRKCH	RP11-626H12.2	DSPP	G3BP1	RP11-1007O24.2		NDUFS1
PRMT3	RP11-626K17.3	DSTN	POLR1B	CNIH4		ACVRL1
PROS1	RP11-637A17.2	DSTYK	TSPAN7	LOC100506314		DBNDD1
PRSS35	RP11-646I6.5	DTD1	MRPS30	ZNF622		CRLS1
PRSS50	RP11-689K5.3	DTD2	EDC4	RAP1B		COG3
PSD3	RP11-6N17.4	DTL	PADI3	ALDOA		TMEM26
PSMA5	RP11-77P16.4	DTWD1	CPLX3	AC128677.4 /// CH17-132F21.1 /// IGKV1OR-1 /// IGKV1OR-1 /// IGKV1OR10-1 /// IGKV1OR10-1 /// IGKV1OR2-2		ATG2A
PSMA7	RP11-79O8.1	DTX2	LSM14A	SCD		TEX261
PSMC4	RP11-79P5.9	DTX3L	RNF130	TMEM132A		PAFAH1B3
PSME3	RP11-7F18.2	DTYMK	FAM208A	ARPC3		PRMT5
PSMG1	RP11-7K24.3	DUOX1	JOSD1	KCNK1		GNG2
PSTPIP2	RP11-822E23.8	DUOX2	NIF3L1	SNRPC		KLHDC8A
PTAFR	RP11-831A10.1	DUOXA2	GZMM	NDUFA7		TM7SF3
PTGES	RP11-855O10.2	DUS1L	ATP5G3	C2orf47		ZNF542P
PTGS2	RP11-85G18.6	DUSP1	SET /// SETSIP	MYO5B		THUMPD1
PTK2B	RP11-91G21.1	DUSP10	STAG1	MRPS10		UBA6-AS1
PTPN18	RP11-91J19.4	DUSP14	CKAP2 /// IGLC1 /// IGLV1-40 /// IGLV1-40 /// IGLV1-50 /// IGLV1-50	PAFAH1B2		ORC3
PTPN6	RP11-923I11.6	DUSP2	URI1	IFIT5		KLF15
PTPRO	RP11-92K15.3	DUSP26	NUDT9	IGJ		RXRA
PXDN	RP11-97O12.2	DUSP6	TMEM212	RP5-1092A3.4		ABCF1
R3HDM4	RP13-539J13.1	DYNLT1	SLC8A1	LARP4		CTU2
RAB11FIP2	RP13-631K18.3	DYSF	ACAP2	KCNQ2		PRPF6
RAB20	RP3-393E18.2	EBI3	RUNX3	ATP5G1		EVI5
RAB24	RP3-400B16.1	EBPL	GLB1 /// TMPPE	PRF1		PARP9
RABGGTB	RP3-430N8.11	ECH1	PMF1	ARMC12		MGAT1
RABL2A	RP4-535B20.4	ECHDC2	NPVF	NISCH		PMS1
RABL2B	RP4-594I10.3	EDC4	FYB	POLM		LMLN
RAC2	RP4-666F24.3	EDEM2	GPD2	SYT1		PLAG1
RALGAPB	RP4-765H13.1	EDN2	C2orf47	KCTD16		ZNF570
RALGPS1	RP5-1004I9.1	EDN3	NPEPL1	DDB2		ZSCAN2
RAMP2	RP5-1021I20.2	EEF1B2	LOC729164	WASL		RABL2B
RAP1GDS1	RP5-933K21.3	EEF1G	PSMB3	NOP10		PTMS
RAPGEF3	RP6-206I17.3	EFCAB3	PPP1R2P9	NET1		NREP
RARRES1	RPAIN	EFCAB4A	PLP2	ARID4B /// RBM34		GTPBP2
RASD1	RPH3AL	EFCC1	PRKCH	CIB1		MRPL55
RBAK	RPL10A	EFHC2	CLUHP3	LINC01346		PITPNC1
RBM12B	RPL11	EFHD1	SSR3	LOC440434		RAB6A
RBM33	RPL12	EFNA4	FAM13B	MTDH		PRELID3B
RCE1	RPL13	EGFL8	NGB	C1orf168		SAMD1
RDH10	RPL18A	EHD1	DDR1-AS1	CHRNA1		OXCT1
RELB	RPL23A	EHD4	KLF11	CYS1		GAR1
RELT	RPL32	EHHADH	SLC2A14 /// SLC2A3	PTCHD4		PITPNM1
RGS5	RPL35	EID3	IRF4	AK096592 /// YLPM1		NUDT21
RHBDF2	RPL35A	EIF2A	NR4A3	PDE7B		CTSO
RHCG	RPL36	EIF2B3	EFS	RNF113A		DCUN1D2
RHOA	RPL37A	EIF3A	LRBA	TTL		NKX2-2
RHOQ	RPL4	EIF3E	GSTA4	FKBPL		ACO2
RIMBP3B	RPL7	EIF3F	MASP1	AK057657 /// RP11-473I1.9		FAN1
RINL	RPS12	EIF3J-AS1	NUP93	CROCC		TMEM37
RIPK2	RPS19	EIF3K	KIF5C	TMEM11		ANKS3
RIT1	RPS2	EIF3L	NRGN	RP11-399E6.1		IBA57
RNASEH2B	RPS24	EIF4EBP2	ANGPT1	ZNF697		TMEM184A
RNF149	RPS29	EIF5A	IFNB1	MEFV		REXO2
RNF168	RPS5	ELF3	SLC16A8	ABHD3		PITPNA
RNF170	RRAGB	ELF4	SCML1	PIANP		ZNF473
RNF19B	RRAGD	ELK1	CKS1B	RNF181		RTL6
RNF24	RRN3	ELL	ID4	BMP2		DRG1
RNFT1	RSPH10B	ELOVL7	IDE	TCP11L2		ATAD3B
RNPEP	RTN2	ELP4	HOXC8	SIDT2		SASS6
RORC	RTP4	EMCN	GTF2H3	LOC101928464		LRRC32
RP9	RUNDC3B	EMID1	C1QBP	ADH1B		TAF5
RP9P	RUNX2	EML6	AK6 /// TAF9	MAFG		MARVELD3
RPL17	S100A14	ENDOG	CST3	ZSCAN31		LDLRAD4
RPL23AP53	SAAL1	ENHO	PREB	APTR		TBC1D10A
RPL34	SALL2	ENKUR	SPATA5L1	PSMA4		GON4L
RPL5	SAMD3	ENOPH1	MTR	CTNNA1		MTPAP
RPP30	SAMD9L	ENPP7	SC5D	AHSA2		FUCA2
RPP40	SAMM50	ENTHD1	ALDH1L1	MTIF3		KLC4
RPS3A	SBK2	ENTPD2	TMPRSS3	GPATCH11		ZNF3
RPS7	SCAMP5	ENTPD3	KIAA1279	R3HDM1		MKRN2
RPSAP58	SCARB2	EPB41L4B	MAZ	APMAP		MIB2
RTCA	SCG3	EPHA1	MUC3A /// MUC3B	AQP5		PSMD3
RUNDC3B	SCGB2B2	EPHA2	ANKMY2	TRIAP1		GRASP
RUNX1	SCGB3A1	EPHA4	STAM	CCNC		GPR4
RUNX3	SCGN	EPHB2	POLQ	EIF5A2		TXNL4B
RWDD4	SCIN	EPHB6	AIFM1	JMJD7-PLA2G4B /// PLA2G4B		NAA15
S100A9	SCP2	EPHX2	TNFRSF1B	TIA1		COPS2
S1PR1	SCPEP1	EPHX4	MTUS2	MRPL51		TMEM167B
SAA1	SDE2	EPSTI1	ZBED5	HBB		TSPAN13
SAA2	SDPR	ERAL1	PPFIA2	CACNA2D3		ZFAND1
SAA3P	SEC14L5	ERAP1	PCNA	ABCE1		PCYT1A
SAA4	SEMA3G	ERAP2	NBEAL1 /// RPL12	VTA1		DSN1
SAC3D1	SEPT1	ERCC2	COPS7A	RALY		CYP27A1
SAMD13	SEPT11	ERCC5	DDX51	TPRKB		VSTM2L
SARM1	SEPT3	ERI1	CCR3	COIL		TRAPPC10
SATB2	SEPT6	ERICH2	SMNDC1	USP46		TSPAN9
SBNO2	SEPT8	ERLIN1	STARD5	STX16		ARSD
SCARF2	SERF1A	ERO1L	COIL	MRPL48		NKAP
SCD5	SERF1B	ERP27	KCNAB3	GLRA1		GOLPH3
SCFD2	SERP1	ERP44	KPNA6	TTC21A		ELP1
SCGB1D2	SERPINI1	ERVMER34-1	LBP	SETD4		GOLT1B
SCO1	SERPINI2	ERVV-1	CALM1 /// CALM2 /// CALM3	DEF8		TMEM132D
SCRT1	SESN1	ESM1	CNOT8	TRO		BUB3
SEC24A	SETD2	ESYT1	PSMD14	AAR2		PRKAB1
SELK	SGCE	ESYT3	CARD14	MST1R		MPV17L
SEMA4B	SH3BGRL	ETFDH	MAPK8IP3	IGKV1-17 /// IGKV1-17		EIF3F
SEMA4F	SH3GL2	ETNK2	KRT2	AX747630		MTHFD1L
SEMA6C	SH3KBP1	ETS2	ENDOD1	GLRX2		SMAD9
SEMG1	SIGLEC10	ETV4	TSR1	NDUFA9		SEMA3F
SEPP1	SIMC1	ETV6	UBA2	ANP32A		NUBP2
SERAC1	SIX5	ETV7	ARPIN	GLTSCR1L		AKTIP
SERPINB7	SLBP	EVPL	KIZ	RP3-476K8.3		NIPA2
SERTAD1	SLC13A5	EXOC3L1	ZNF287	ATP5S		SNHG16
SETD3	SLC16A9	EXOC3L4	GABRR2	AOC2		EEF1AKMT4
SFR1	SLC18A3	EXOC6	FLJ42627	PDE12		MIR22HG
SFRP5	SLC1A5	EXOSC5	WT1-AS	BC048103 /// CSGALNACT1		FLT1
SFXN3	SLC22A15	EXTL2	MYH3	SNRPA1		WNK2
SGCZ	SLC22A16	EZH1	LINC00563	SSB		LINC02593
SGK2	SLC25A36	F11R	CNPY4	SMIM15		DDX51
SGMS1	SLC25A38	F13A1	MEGF6	AGAP10 /// AGAP11 /// AGAP4 /// AGAP5 /// AGAP9 /// BMS1P5 /// CTGLF12P /// LOC101060581		CDC37L1
SGPP2	SLC25A47	F2RL1	SLC24A2	STKLD1		GPX2
SH3BGR	SLC25A53	F7	SEPT10	KSR1		NOP58
SH3PXD2B	SLC29A1	F8	C8orf33	FAM98A		KRBOX4
SHC1	SLC30A4	FADS6	WFDC1	TENM2		ZMYM3
SHISA5	SLC30A8	FAHD2B	ETAA1	MFSD8		C12orf29
SIAE	SLC35E4	FAM101B	PDHB	RPF2		LINC00365
SIDT2	SLC38A4	FAM102A	WDR47	LOC100996724		JUN
SIGLEC14	SLC38A5	FAM105A	ADAM19	CPNE3		KLHL5
SIL1	SLC43A2	FAM109A	TMED3	GPR143		MYT1L
SIRT3	SLC44A5	FAM110C	CCNB1IP1	EXTL3-AS1		FBXO4
SIRT5	SLC46A3	FAM114A2	LAIR2	PSMC6		TRMT2A
SKAP2	SLC4A8	FAM115C	LAMTOR3	CTD-2012K14.6		PDE12
SLAMF1	SLC5A12	FAM117A	RAB11FIP2	ILF2		DLG2
SLC11A2	SLC9A9	FAM117B	CACNB3	SPRYD7		MSRB2
SLC16A2	SLCO1A2	FAM122C	BRF1	PODN		DOCK6
SLC16A3	SLITRK1	FAM124A	RP11-10N23.4	MTFP1		GOLPH3L
SLC17A4	SMARCA1	FAM124B	CCPG1 /// DYX1C1-CCPG1	FBXL5		DIS3
SLC17A5	SMARCC2	FAM133B	PAM	STK36		ZNF417
SLC1A3	SMIM4	FAM135B	TOX3	MC1R		UBA6
SLC20A1	SMIM6	FAM136A	ANKRD10-IT1	KIF5B		FEM1C
SLC22A4	SMN1	FAM159B	RUSC2	SET /// SETSIP		SOCS7
SLC22A5	SMOC1	FAM171A1	IGLV4-60 /// IGLV4-60	TLL2		ZPR1
SLC23A3	SNAP91	FAM171A2	OSBPL10	SC5D		EEPD1
SLC25A15	SNIP1	FAM173B	TERT	REL		EPB41
SLC25A21-AS1	SNRNP27	FAM174B	LRRC20	C4orf46		TMEM67
SLC25A27	SNRNP48	FAM177A1	PDCL3 /// PDCL3P4	AL022344.5		PAICS
SLC25A36	SNX12	FAM179A	DOC2A	USH2A		UTP11
SLC25A43	SNX29	FAM184B	MAMLD1	POLR2D		IDH3A
SLC25A51	SOCS2	FAM186B	TMEM59	NTMT1		TIAM1
SLC27A1	SORBS1	FAM188B	EEF1E1	EARS2		HGS
SLC27A4	SOX9	FAM189B	RNF139	TXNIP		SS18L1
SLC29A2	SPAG16	FAM195A	HERPUD1	IGFN1		CA4
SLC2A4RG	SPAG5	FAM195B	HLA-DMB	CGA		IFT80
SLC2A6	SPARC	FAM198B	MAGI1	PARP6		MEX3C
SLC2A8	SPATA18	FAM19A4	KCTD17	EVL		PDGFA
SLC31A2	SPATA7	FAM200B	RIOK3	PDCD2L		PAQR8
SLC34A3	SPATS2	FAM203A	CANX	YRDC		VARS
SLC38A3	SPCS1	FAM211A	CRTAC1	TTLL10		RNF126
SLC39A10	SPOCK2	FAM211B	DPP8	FAM214B		B3GNT8
SLC39A14	SRGAP3	FAM213A	TMED5	OTUD6B-AS1		FLOT2
SLC3A1	SSTR2	FAM219B	PSMG2	BEND3		RANBP1
SLC40A1	STAR	FAM228B	LOC101928378	NDUFC1		LCMT1
SLC43A2	STMN2	FAM26F	SLC25A17	TMEM150A		GTF2F2
SLC46A1	STOM	FAM46B	RGS12	MRPS17		RAB15
SLC46A2	STON2	FAM50B	RPL11	MMGT1		FEN1
SLC4A11	SUMO3	FAM53A	LY6D	BTNL9		PTK7
SLC6A14	SVIL	FAM63A	GOLGA2P5	ARHGEF37		ZNF674-AS1
SLC7A11	SVIP	FAM76A	CHKB-CPT1B /// CPT1B	POLR1E		WDR36
SLC7A5	SYNDIG1L	FAM78A	GOLIM4	FAM175B		GRIA4
SLC7A5P2	SYT11	FAM78B	GPLD1	USP22		SLC2A12
SLC7A9	SYT15	FAM81A	SLC26A2	ID3		YIPF4
SLCO4A1	SYT6	FAM90A1	RAP1GDS1	UBE2K		LRRC1
SLCO4A1-AS1	SYT7	FAM92A1	CYP4F12	ADAM33		EFL1
SLMAP	SZRD1	FAM98B	C14orf1	CCNB1IP1		BOD1L1
SMAD7	TADA1	FAM98C	C21orf2	KCNB1		SNCB
SMARCA1	TAF5L	FAS	PPP2R5C	PPM1M		HHEX
SMC3	TAGLN2	FAT1	NRCAM	TP53RK		CYB561D2
SMIM19	TAPT1	FAXC	SKAP1	TPI1		GNA11
SMIM3	TATDN3	FBP1	ANXA13	BC024027 /// RP11-268G12.1		PTRH2
SMIM8	TBC1D20	FBXL16	POGK	UBE3C		MMRN2
SMOC2	TBCC	FBXL4	FAM8A1	WDR53		ARHGAP5-AS1
SMYD3	TBPL1	FBXO24	DCSTAMP	ANXA2P3		DPH3
SMYD5	TBX1	FBXO25	RHOBTB3	ETF1		EMSY
SNAPC2	TCEA1	FBXO6	TRAM1	SMAD3		TMUB2
SNAPC5	TCEAL1	FBXO7	MYL1	KIAA0087		IRF2BPL
SNCAIP	TCEAL4	FBXW9	FAM96B	RP11-332H18.4		TRMT112
SNHG1	TCEAL7	FCAMR	CHRNA2	OSGIN1		RIOK1
SNHG8	TCEAL8	FCER2	ADARB1	TMEM223		MORF4L2
SNORD76	TCEANC	FCGR1A	SEC61A1	C12orf43		PRR15L
SNPH	TCEB1	FCN3	MRPL19	NAA40		TXNDC12
SNUPN	TCERG1L	FCRL4	DNAI1	MRPL54		PIP4K2B
SNX17	TCF24	FCRLA	VPS26A	UBE2QL1		TMEM14A
SNX5	TCTEX1D2	FEM1C	SHC1P1 /// SHC1P1	NDUFA4		KMT5C
SOAT2	TEC	FERMT1	TMEM126B	KLHL31		TRUB2
SOCS1	TGFBRAP1	FEZ1	MFAP3	RPL14		GOLIM4
SOCS3	THBS1	FFAR2	NR2F1 /// NR2F2	OXSR1		LAMP3
SOD2	THG1L	FGB	ADAM29 /// LOC101928551	FANCL		SNHG20
SORBS3	THOC5	FGD1	VPS4B	MBD6		HIP1R
SOX13	TIGD6	FGF1	PAXBP1	ANXA2P1		GAD2
SOX8	TIGD7	FGF10	IFT52	LOC101928521		PLEKHG2
SP6	TIMP2	FGF14-IT1	APOBEC3C	RP11-533E19.7		HSPA14
SPAG8	TINAGL1	FGFBP3	MAP1LC3B	CHCHD2		ZNF347
SPARC	TINCR	FGFR3	POLDIP3 /// RRP7B	SFPQ		CLEC1A
SPATA32	TIPIN	FGFR4	PAX2	MFI2-AS1		MIR210HG
SPEF2	TM6SF1	FHDC1	LAMA4	KBTBD8		CADPS2
SPIN2A	TMC6	FHL1	ERC2-IT1	PLRG1		TSSC4
SPIN2B	TMEM100	FHL2	GCC2	QRICH2		MXRA7
SPOCD1	TMEM109	FHOD1	TPD52	IGLV1-44		CALR
SPOCK1	TMEM128	FHOD3	RPS15A	ANKRD36B		TAGLN3
SPRR1B	TMEM130	FIBIN	KHDRBS2	ITGAL		LRIG3
SPRY4	TMEM170B	FIGF	SEPT5-GP1BB	DANCR		INPP5E
SQRDL	TMEM184B	FILIP1L	PPP6R1	PFDN1		KDM7A-DT
SRA1	TMEM185A	FJX1	LRRC61	RBM8A		YME1L1
SRD5A1P1	TMEM189	FKBP1B	TPRKB	DLG5		PRKCD
SRGAP3	TMEM208	FLNA	IGKV1-37 /// IGKV1-37 /// IGKV1D-37 /// IGKV1D-37	RPS6KA2		DDIT3
SRSF6	TMEM230	FLNC	DHX34	LOC101927560 /// LOC101927587		SUPT5H
SRSF8	TMEM231	FLRT2	RALGAPA1	FARP2		SLC33A1
SS18L1	TMEM232	FLVCR1	KIAA1751	MIR3658 /// UCK2		COPB1
ST3GAL1	TMEM242	FLYWCH2	GFPT1	VAT1		RNPS1
ST3GAL4	TMEM251	FMN2	CXCR5	ZNF813		CEP57
ST5	TMEM255A	FMNL2	FHL3	GNL2		CDKN2AIP
ST8SIA2	TMEM52	FMO5	SMG8	ANXA10		LAMB1
STAT3	TMEM55A	FN3K	CRX	TPCN1		CXCR4
STC1	TMEM59	FNDC4	ETFA	NPIPA1		WASF1
STC2	TMEM66	FNDC5	ERICH1	FYTTD1		MINDY2
STEAP1B	TMEM92	FOSL2	TAS2R16	RMST		RBM27
STIM1	TMEM9B	FOXA2	SEMA3F	INSIG2		ERVK3-1
STMN1	TMX4	FOXP4	CCT7	STRADB		PTPRH
STOML1	TNFSF4	FOXRED2	CRNN	TNFRSF12A		KAZN
STOX2	TNNC1	FOXS1	ORMDL2	ARHGEF25		CMC2
STRADA	TOP2B	FPGT	PSCA	CRLF1		GPR180
STRBP	TOX3	FRAT1	ITGA9	CSRP2BP /// PET117		ZFP3
STX11	TP53	FRAT2	EIF2S2	CCDC85A		SLC18B1
STX3	TP53INP2	FRMD3	VDAC2	RNF34		LAMA1
SUDS3	TPH2	FRMD4A	HSF2BP	CCDC39 /// LOC101928882		OSGEPL1
SUGCT	TPPP3	FRMD6	ASAP3	CTB-43E15.1		MAOB
SUMO1P1	TPR	FRMD8	GAK	LINC01410		VPS33A
SUPT6H	TPRG1L	FRRS1	PRMT5	DCTN6		SLC26A2
SVEP1	TPST1	FRS3	OSBPL9	LOC339539		DUSP11
SYNDIG1	TRAK1	FRYL	CRHR2	GALNT14		POLD3
SYNJ2	TRAM1L1	FRZB	TSKU	CMPK2		TCF7L2
SYNM	TRAM2-AS1	FSCN1	ENTPD2	LRRC6		CABLES1
TACR1	TRAPPC10	FST	NPY6R	RP4-539M6.21		BET1
TAF11	TRIB2	FSTL3	FCF1 /// MAPK1IP1L	RGL3		NABP2
TAF1D	TRIM71	FTH1	PGLYRP1	ARFIP1		NHP2
TAF5L	TRIQK	FUNDC1	CRIP1	SLC30A1		DNAJC5
TAGLN	TRMT61B	FUT1	BTNL8	NANOS3		KLF7
TAMM41	TSGA10	FUT5	GABARAPL3	AGPS		OTUD5
TANGO2	TSHR	FUZ	GPR63	ASH2L		PRELP
TAPBP	TSPAN2	FXN	YBX1	RIPK4		COPB2
TBC1D4	TSPYL1	FXR2	SSX3	COX10		CDKAL1
TBX3	TSPYL6	FXYD6	STAG3L3	CNTNAP5		MRC2
TCAF2	TTC19	FYB	BCAS2	MRTO4		CCNT1
TCEA2	TTC21B	FZD2	VBP1	CEBPG		PAGR1
TCEAL4	TTC23	FZD5	BTAF1	ASPH		ATP8B2
TCEAL8	TTC34	FZD9	LOC101930324 /// NSF	DAPK3		DYRK4
TCHP	TTC39C	G0S2	IL25	CCDC144A /// CCDC144B /// CCDC144CP /// LOC101929141		KAT8
TCOF1	TTC7B	G6PC2	ALKBH1	COPS3		SELENOI
TCP11L1	TTLL9	GABARAPL1	TARP	TES		MLH1
TDRD3	TUBB1	GABRD	LOC101929304 /// SNX29	SCNN1B		ZNF283
TESC	TUBB8	GABRG2	RAB5A	CCDC24		LEMD2
TEX2	TUSC3	GALK1	SMPDL3A	FGFR1OP		SETD7
TFAP4	U2SURP	GALM	LOC101060521 /// POLR3E	PRDX5		HSPB6
TFE3	UBAC2-AS1	GALNT11	COL9A1	KIF2A		SLC30A6
TFPI2	UBE2E2	GALNT16	OR11A1	GSTM3		C16orf46
TGM2	UBE2G1	GAMT	TARS	GNA13		TMEM229B
THAP12	UBE2Q2	GAS6	GPR153	PABPC1L		AHDC1
THBS1	UBTD1	GATA6	CRLF3	SLC24A3		NEGR1
THNSL1	UBXN10	GATA6-AS1	GNAI1	ZNF337		TIAL1
THRA	UNC13D	GATM	SLC25A36	METTL8		CREB3L1
THUMPD1	USP27X-AS1	GATS	LMAN1L	HSPE1-MOB4 /// MOB4		C16orf91
THUMPD3-AS1	USP39	GATSL3	IL36A	ARHGAP33		TBC1D25
THYN1	USP49	GBP1	HRASLS2	PRSS23		KIAA1549
TIAL1	USP54	GBP2	GPA33	PMFBP1		DNAJC2
TIMM10B	VAMP4	GBP3	TLK1	UBTD1		CFAP36
TIMP2	VMA21	GBP4	LPXN	MUC12		ZER1
TLL2	VOPP1	GBP5	NUP153	IGLL3P		PSMG3
TM4SF18	VSIG4	GBP6	DDX21	NACA		TMEM167A
TM7SF3	VWA8	GBP7	MRPL18	SFI1		ZNF362
TMED1	WBP11	GCHFR	FRS3	DRAP1		HSPA13
TMEM106C	WBP5	GCNT3	ARHGAP15 /// LOC101928361	CYB5R4		CCP110
TMEM132A	WDFY2	GCSH	SLC6A20	ZNF57		LDB1
TMEM133	WDR20	GDF11	TXNL4A	DKK1		MTO1
TMEM143	WDR37	GDF5OS	KCNB2	ABT1		PIH1D1
TMEM145	WRB	GDF6	ALDH1A1	MCAM /// MIR6756		BRSK1
TMEM14A	WWOX	GDI2	ARID5A	AKIRIN1		STAT6
TMEM150A	XPA	GDPD1	GCA	ANKRD36		MR1
TMEM150C	XXbac-BPG55C20.7	GDPGP1	CSTF3	PITPNM2		FHOD3
TMEM165	YRDC	GFPT2	IGLC1	SNED1		CBX6
TMEM169	YTHDF1	GGCT	ITFG1	PSMA2		SART3
TMEM192	ZADH2	GGNBP2	SNCAIP	PDE1A		WDR46
TMEM223	ZBTB1	GGT1	MAP2K7	DLEU7-AS1		MNX1
TMEM230	ZBTB2	GGT2	STRAP	ABCC5		FNBP4
TMEM234	ZBTB26	GGT6	FZD2	LARP7		NFX1
TMEM25	ZC3H12B	GGTLC1	AP3B1	SKP2		MMUT
TMEM253	ZC3H14	GGTLC2	CD38	UBE2V2P3 /// UBE2V2P3		NUP214
TMEM260	ZC3H7A	GID4	TAOK1	CCNK		ZCCHC4
TMEM39B	ZC4H2	GIMAP2	SERPINB10	MICU1		CDC5L
TMEM41B	ZCCHC18	GIMAP7	RNF6	STK35		TRAPPC2B
TMEM42	ZCCHC6	GINS2	NOC3L	IGLC1		ZNF470
TMEM43	ZDHHC24	GIT1	KIF2A	MIR3934 /// UQCC2		DDX19A
TMEM72	ZER1	GJA4	UBE3B	CALY		RNF185
TMEM74	ZFP37	GJB1	MKL1	VRK2		CNEP1R1
TMEM88	ZIK1	GJB2	SERPINF2	HMHA1		UBE4A
TMEM92	ZKSCAN2	GJB5	PLEKHB2	MRPS11		TRAK2
TMEM98	ZMIZ1	GJD2	NDEL1	LOC101928524 /// PRPF18		ERG28
TMPRSS5	ZMYM5	GK	CAPN5	PREP		RAMAC
TMX1	ZNF12	GKAP1	ITGAE	DFFB		DDR1
TNF	ZNF134	GLI1	RPF1	TBC1D7		MCMBP
TNFAIP2	ZNF136	GLMN	CCL16	AZIN1		CCDC186
TNFAIP3	ZNF14	GLO1	IGHG1 /// LOC100293211	YTHDC1		SLC4A1AP
TNFAIP6	ZNF140	GLOD5	GPN3	TMEM189 /// TMEM189-UBE2V1 /// UBE2V1 /// UBE2V2		IARS
TNFAIP8	ZNF157	GLRA1	DPYSL4	ZNF829		HBP1
TNFSF13B	ZNF17	GLRB	MFAP1	EML6		RCN1
TNIP1	ZNF175	GLRX	SCAMP1	RBM47		EIF4EBP1
TNIP2	ZNF180	GLRX5	GOLGA4	TMA16		ADM2
TNIP3	ZNF222	GLS2	MYCLP1 /// MYCLP1	CDK9		TIGD7
TNXA	ZNF223	GLT8D1	IGK /// IGKC	LOC100128922		NBEAL2
TOLLIP-AS1	ZNF230	GLT8D2	PRKACB	TKT		RLIM
TOM1L1	ZNF26	GM2A	ADAM28	MARVELD2		GLIPR2
TOMM34	ZNF263	GMFG	CYB5R1	APOD		BRI3BP
TP53INP2	ZNF280B	GMNN	ACOT1 /// ACOT2	AKR1B10		PCDH1
TP53TG1	ZNF280C	GNAI1	RNF167	FLJ38717		ZNF10
TP53TG5	ZNF280D	GNAS	DDHD2	AGAP11 /// AGAP4 /// AGAP6 /// AGAP7P /// CTGLF12P /// LOC101060581		MMP24OS
TPI1	ZNF304	GNB5	CDC5L	RBM26		ZNF26
TPP1	ZNF329	GNE	ADAM8	HIST1H3C		ERCC8
TPPP3	ZNF362	GNG10	CLGN	UBE2D4		CSNK2B
TRAF3	ZNF382	GNG7	DNAJA2	RP4-539M6.14		RACGAP1
TRAF3IP2	ZNF385D	GOLGA8S	PSG2	LINC00616		COPG2
TRAF5	ZNF398	GP1BA	GMIP	P2RY14		TMEM164
TRAPPC2	ZNF415	GP2	CD2	LOC441081		TMEM106C
TREM2	ZNF417	GP5	MRPS12	ABTB1		PLCXD3
TRERF1	ZNF419	GPBP1L1	DIMT1	PSME3		YAE1
TRIAP1	ZNF432	GPC1	RTN1	MIRLET7D		USP8
TRIM45	ZNF441	GPD1L	PRKD3	TRIB3		MTMR6
TRIM65	ZNF461	GPLD1	FMNL1	LINC00639		PEX13
TRIM7	ZNF484	GPNMB	ACRV1	KMT2A /// LOC101929115		SLC30A9
TSEN2	ZNF487	GPR124	ALOX12	TUBA1A		TRIM68
TSFM	ZNF497	GPR125	PRKAB1	BC062763		FBXO42
TSN	ZNF502	GPR155	PAK7	PPIA		EEF1E1
TTC17	ZNF510	GPR34	LYPLA1	CORO6		ZMYM6
TTC19	ZNF529	GPR37L1	QTRTD1	LOC728353		EHBP1L1
TTC32	ZNF534	GPR61	TERF1	EXOC3		FAM222A-AS1
TTC39B	ZNF543	GPR63	PDSS1	TTLL6		ZRANB1
TTLL1	ZNF549	GPR68	GTF2E2	DDX49		BRAP
TUG1	ZNF566	GPR84	PYGM	ABHD13		ATL2
TXNRD1	ZNF585A	GPR85	PTK7	DNAJC14		SLC25A51
TYRO3	ZNF586	GPR98	MRPL41	SPRR3		ITCH
UBAP1L	ZNF608	GPRC5B	CYP17A1	PDSS2		IK
UBD	ZNF618	GPX4	LTBP2	LOC101060363 /// PPIA		GCNT4
UBE2G2	ZNF620	GPX7	PRX	C11orf53		ADAM17
UBE2N	ZNF629	GRAP	AGRP	LOC101929718		CDK7
UBXN8	ZNF639	GRAPL	PHB2	PRMT2		PTGFRN
UCN	ZNF655	GRASP	EXO1	ANKRD50		GSS
UCP2	ZNF660	GRB14	BBC3 /// MIR3190 /// MIR3191	C11orf48 /// LOC102288414		SYT4
UGT2A3	ZNF665	GRHL2	USP5	TRIM36		USP16
UGT2B15	ZNF667	GRHPR	ZNF391	CHN1		RAD9A
UIMC1	ZNF709	GRID1	WDR44	RMND5B		MON1B
ULK2	ZNF710	GRIK4	CUTC	BCL2L13		TEF
ULK3	ZNF711	GRK4	DPM1	MTMR2		LPCAT1
UMPS	ZNF726	GRM2	CIB2	XRCC4		OSTC
UNC5CL	ZNF740	GRM3	TMEM30B	CTC-429P9.3		MAF
URB2	ZNF764	GS1-124K5.4	EXTL1	LOC102723704		PSD4
USF1	ZNF773	GS1-166A23.2	ACYP1	SNRNP70		TSPYL2
USP28	ZNF774	GSDMB	OSBP	RHPN1-AS1		PURB
USP38	ZNF776	GSDMC	SLC25A38	LMO3		ZNF829
USP43	ZNF777	GSDMD	ADORA1	BLOC1S3		C1orf109
UTP20	ZNF8	GSG1	FUCA1	DUSP3		AMPD2
VASH2	ZNF812	GSTA1	EEF2	LAMB3		CLPB
VAT1	ZNF846	GSTA2	TNK2	LOC284669		VAMP4
VAV1	ZNF853	GSTA4	PRKAR1A	KCNV1		ZNF841
VCL	ZP3	GSTM1	TMEM208	IFFO1		DDX49
VCP	ZRANB1	GSTM2	SPIB	CFD		HMGB3
VDR	ZSCAN25	GSTM3	ALX4	KIZ /// PLK1S1		SLC52A2
VIM	ZUFSP	GSTM4	CNGB3	TYW3		MTRR
VIPAS39		GSTM5	ABHD11	ITGB2-AS1		TMUB1
VPS25		GSTO2	GPR157	FRG1B		PAPOLA
VPS35		GSTP1	CBWD1 /// CBWD2 /// CBWD3 /// CBWD5 /// CBWD6 /// CBWD7 /// LOC101060578	HERC2P2 /// HERC2P9		C1orf43
VTCN1		GSTT1	KPTN	CUL1		QPCTL
VWA5A		GTDC2	FAM49B	SYNE1		PTBP1
WASH5P		GTF2H5	C1GALT1C1	SPRTN		MAFG
WASL		GTF3A	DUSP11	TNRC18		ZNF527
WDR25		GTPBP2	APOO	SLC30A5		INS
WDR3		GUCA1A	EEF1G /// MIR3654	AP1G2		UNC5C
WDR31		GUCA2B	SLC39A6	TYK2		LRP5
WDR37		GUF1	GPX5	ALG10		FUBP3
WDR6		GULP1	CPD	CHML		GSTK1
WDR70		GUSB	SNRPN /// SNURF	IDUA		TXNDC9
WDSUB1		GYS1	HIGD1A	PPFIBP2		ZNF75D
WIPF1		GZMH	TASP1	KIF3B		B2M
WLS		H2AFY	C6orf120	AGFG1		TKT
WNT2B		H2AFY2	H6PD	METTL21A		GDI2
WTAP		H6PD	DBT	GNAI3		VAV3
XKR4		HACL1	CES1P1	VDAC2		TLE2
XPC		HADH	RCHY1	AP1G2 /// JPH4		BNIP3L
ZBTB16		HAGHL	CDS2	SNX31		OIP5-AS1
ZC2HC1A		HAPLN3	PRKAA1	DYNC2LI1		TEX30
ZC3H12A		HAS1	RBM3	FECH		CFC1
ZC3H12C		HAUS4	FABP7	CTSF		PSAT1
ZCCHC7		HCFC1	PTDSS2	PKN1		BAMBI
ZFAND6		HCFC1R1	DYRK2	UBE2V2		LAPTM5
ZFP2		HCK	CDK7	BLMH		RAVER1
ZFP3		HCN4	C22orf24	TRIB1		CTSB
ZFP62		HCST	CYP2A7	MPV17		ZMYND19
ZFP90		HDAC11	SNRPB	C4orf19		FBXW8
ZGLP1		HDAC5	GLRX3	MOB4		KANK1
ZKSCAN1		HDDC2	ADD3-AS1	APOLD1		HMGCLL1
ZKSCAN8		HDDC3	ZBP1	PLB1		RGP1
ZMAT1		HDGF	AKAP9	FZD1		NIFK
ZMPSTE24		HDLBP	MXRA7	LOC100507006		UBTD1
ZMYM3		HEBP1	TMEM209	TRABD		COLCA1
ZNF112		HECTD3	MMP26	GAR1		GDF11
ZNF135		HELLS	BARX1	ASAH2B		ABAT
ZNF174		HELZ2	SKIV2L	AX746710		COL4A1
ZNF177		HENMT1	CLINT1	KLHDC4 /// LOC100129637		FLT4
ZNF202		HEPACAM2	SYT12	NENF		SLC7A1
ZNF234		HERC2	SRP19	LOC100287166 /// LOC101930064		USP38
ZNF239		HEXB	PGF	BC040624 /// FOXP1-AS1 /// FOXP1-AS1		FOXRED1
ZNF248		HEXIM2	CHI3L1	FCRL2		RXRG
ZNF25		HEY2	RGR	GFER		TIMM21
ZNF263		HEYL	GIPC1	SMEK2		CMSS1
ZNF285		HIATL1	PTAFR	RP11-196G18.24		SMARCC2
ZNF3		HIBADH	ZNF783	TMEM212		RTCB
ZNF30		HIBCH	C1D	ARPC5		C1orf174
ZNF311		HIC1	GRAP	SLC11A1		SERF1B
ZNF32		HINT2	RANBP6	PDP1		STRAP
ZNF345		HIRIP3	TWF1	C19orf33		LINC00673
ZNF362		HIST1H2BJ	CASD1	C3orf52		SORL1
ZNF404		HIST2H2AA3	GRK5	CALCA		TIGD5
ZNF418		HIST2H2AA4	SEC24D	AGAP6		UTP6
ZNF429		HIST2H2AC	TSSK1B	HMGN3		WAC-AS1
ZNF431		HIST2H2BE	IL1RAPL1	EBP		MAGI1
ZNF449		HIST2H3A	GRB10	LOC388692		SATB1
ZNF487		HIST2H3C	IFNA16	RGS11		ILVBL
ZNF525		HIST2H4A	MZT2B	MYL6		NUAK1
ZNF527		HIST2H4B	YEATS4	PCED1A		DKC1
ZNF564		HJURP	MRFAP1L1	PEX2		FIP1L1
ZNF565		HK1	BMP7	DNAJC12		UBALD1
ZNF589		HK2	PPP1R14D	LOC100506124 /// TTC21B		CDH5
ZNF595		HLA-A	PLXNA3	RAB11FIP5		SAFB2
ZNF606		HLA-B	TYR	PHACTR3		SOD1
ZNF623		HLA-C	ZNF286A	KRT18		FKBP15
ZNF641		HLA-DMA	SNF8	PLEK2		HOMER1
ZNF662		HLA-DOB	SLC34A1	YARS2		TNS1
ZNF70		HLA-DPA1	DDX3X	SPSB3		ASB1
ZNF763		HLA-DPB1	CAAP1	YWHAG		EDARADD
ZNF823		HLA-DQA1	NR1I3	ZNF681		SEC24D
ZNF835		HLA-DQA2	POLR2J /// POLR2J2 /// POLR2J3 /// UPK3BL	C1orf43		URB2
ZNF862		HLA-DQB1	IBTK	DOHH		CFAP20
ZNF92		HLA-DQB2	TTC33	MYL12A /// MYL12B		SETBP1
ZNF93		HLA-DRA	EPB41L3	BTF3		LINC00294
ZNRD1ASP		HLA-DRB1	IL1RAPL2	UTP3		TCP1
ZSCAN20		HLA-E	APLNR	SNX21		ARFIP2
ZSCAN21		HLA-F	CD70	SDC4		RING1
ZSCAN32		HLA-G	SNRPD3	RP11-846E15.4		TAF4B
ZSWIM8		HLTF	RTN2	LOC100288974 /// MBL1P		C12orf57
		HM13	KDM6B	CABIN1		ARIH1
		HMBS	FZD6	AGAP4		ORC4
		HMGA1	ENTPD1	SCAMP3		USP1
		HMGB3	KLK13	GSTM1		RUNDC1
		HMGCS2	RIN1	CYAT1 /// IGLC1 /// IGLV1-44		MTDH
		HNF1B	KCNA1	KLHL15		LOC643072
		HNRNPLL	OR10C1	PXMP4		CBWD2
		HOMER2	PRUNE2	COX7A2P2 /// COX7A2P2		CYP2J2
		HOMER3	ANAPC10	CHAF1A		CDC42EP4
		HOPX	INF2	PLXND1		PPP1R15B
		HPDL	ZMYND11	RP11-319G9.3		MFSD9
		HPS3	FAF1	UNC5C		IRS2
		HRASLS	MMADHC	RBP7		PSMD13
		HRSP12	BDKRB1	ZNF616		SF3A2
		HS3ST1	SF3A2	VAV2		MTA2
		HS3ST3B1	VIM	FUCA2		AKAP8
		HS6ST1	GTF2B	LOC574538		RAB33A
		HSD11B1	ELANE	MLF1		LNX1
		HSD17B14	KRT5	ZNF251		CD59
		HSD17B2	EIF4G2	NAA15		WDR90
		HSD17B4	PPP2R3C	RANBP6		NBR1
		HSD17B8	EPPIN /// EPPIN-WFDC6	MBNL1-AS1		POM121
		HSD3B2	PHLPP2	NDUFA12		SUPT7L
		HSDL1	CALHM2	LOC100506497		MRGPRE
		HSDL2	CLCN1	LOC102725017		SENP3
		HSF2	DIAPH2	PSMB4		IGFBP4
		HSPB1	SIN3B	CWC27		HGD
		HSPB6	COG2	SLC25A5		DNAJC7
		HSPB7	RSRC2	NIFK		SETD1B
		HSPB9	LA16c-381G6.1	CDK7		ZNF674
		HSPE1	RPS18	SF3B6		SRSF8
		HTR1F	EDA2R	EIF4B		TRMT44
		HTR2B	CDC25A	POLR3D		SCG2
		HTR3A	IGHG1 /// IGHM	STAB1		PDHX
		HTR7	HYAL4	CABLES1		UHRF2
		HUNK	ATP2A2	LOC102724094		ATP9A
		HYAL2	RCBTB2	FAM208A		KAT2A
		HYKK	FZR1	RNF6		PARN
		HYLS1	GPR52	KRT7		C18orf25
		ICAM1	CHRNB2	FAM95B1 /// LOC101928261 /// LOC102724314		MAML3
		ICAM3	ZNF574	RPL36A /// RPL36A-HNRNPH2		ZNF12
		ICAM4	TBK1	RNASET2		ST6GAL1
		ICAM5	RP3-497J21.1	AIFM2		DBI
		ICMT	SPG21	ZNF627		CCPG1
		ICOSLG	HSD17B10	MYO15A		RBM48
		ID4	YTHDC2	LINC00930		TSNAX
		IDH1	GMEB2	PIK3CB		AURKAIP1
		IDH3B	MAT2B	GUSB		ARMC6
		IDO1	HIST1H1A	RAB31		UBXN8
		IDO2	KCNMA1	PIGL		ZRANB3
		IER2	ZNF771	SEPT11		CEP120
		IER3	NCOA4	LINC01214		TMEM132C
		IER5	ASCC1	FAM32A		KREMEN1
		IFFO1	WDR62	IGF2BP2		TIMM23
		IFFO2	PLS1	IFT80		GOLGA4
		IFI16	RNF38	MRPS7		NUP35
		IFI27	EVI5	ASNSD1		KCTD20
		IFI30	AARS	COMMD2		LAPTM4A
		IFI35	ERBB2	TFF1		RDH13
		IFI44	GNB2L1 /// SNORD95 /// SNORD96A	DNAJB11		INHBE
		IFI44L	ATP6V0B	TMF1		SLC29A1
		IFI6	SACM1L	GPR176		GCH1
		IFIH1	SSBP1	TMEM203		DDB1
		IFIT1	PRKG1	MIR4800 /// MXD4		TMEM50B
		IFIT1B	DIP2A	RP11-539L10.3		SMAD4
		IFIT2	NPHP4	LOC100128554		SDHAF1
		IFIT3	FBXW11	LOC101928327		CHCHD4
		IFIT5	FAM66D	STS		ACAA2
		IFITM1	BLK	NUFIP1		FBRS
		IFITM10	PPFIBP1	SOX1		RFC4
		IFNGR2	SYNCRIP	FADD		CELSR2
		IFNLR1	UGP2	IGKV1OR2-108 /// IGKV1OR2-108		KLHL15
		IFT172	SCAMP3	GATA6-AS1		PNMA1
		IFT20	OXSR1	AGPAT2		CYLD
		IGFBPL1	MICALL2	DSCAM-AS1		ZNF44
		IGFLR1	AP1AR	BRI3		CNST
		IGLL1	GOLGA7	MRPS12		GLTP
		IGSF11	PPIB	KRT8		DNAJB12
		IGSF23	ZNF611	TRMT12		EPAS1
		IGSF9B	UFL1	POR		MAP1LC3B2
		IKBKE	ANXA2 /// NHP2L1	ATG5		AP3M2
		IL11	ATP2B2	LMO1		ATP5MC3
		IL12A	WRB	BRD7		PXDN
		IL12RB1	HINT1	TTBK1		EIF2B2
		IL15	BCAS1	SLMO2		MMP24
		IL15RA	CHD3	C21orf15		ZNF274
		IL16	ART4	DOLK		LRFN2
		IL17C	EIF3A	FIGN		VIRMA
		IL17D	COPS3	LOC100506469		NLRC5
		IL17RD	DMC1	GOLGA2P5		GBA
		IL17RE	TNNI1	ACTA2 /// ACTA2		STRIP2
		IL18	C9orf3	SF3B1		PUS7L
		IL18BP	CNOT2	C6orf58		PTPRF
		IL19	TMEM33	GPN2		TADA1
		IL1A	YIF1A	MRAP2		CCDC146
		IL1B	SIRPB1	COX17		ZNF548
		IL1RN	CSTF1	NIPAL2		GLRA1
		IL20RA	CAPZA2	ARSG		CYB561D1
		IL21R	KCNJ1	PIGM		FZD1
		IL23A	DRD1	TSR3		ASCC3
		IL27RA	ACTN2	MAATS1		BMS1
		IL2RA	PGAP1	NECAB2		CARM1
		IL2RG	SEC11A	AK4 /// LOC100507855		HFE
		IL32	TP53AIP1	NEDD8		FZD4
		IL33	LOC101060363 /// PPIA	ALAS1		FBXO36
		IL36G	KIAA0196	CCNT2		CNKSR2
		IL36RN	GMPR2	GPR153		GORAB
		IL4I1	KHSRP	GRIA1		NPPA-AS1
		IL5RA	MYO9B	USP39		ELP3
		IL6	APIP	HEBP2		RGS2
		IL7	SAR1B	TTC14		AAMP
		IL8	TFDP1	FKBP1A-SDCBP2 /// SDCBP2		ZNF783
		IMPA1	RP11-680F8.4	ACADVL		SGCB
		IMPDH1	NDUFA5	COG8 /// PDF		PDLIM1
		IMPDH2	MEX3D	MCCC2		PLXDC1
		INA	YIPF6	SIN3B		MTHFD2
		INCA1	GPSM3	TACR1		MLF2
		ING1	RNF34	EBF4		CASC4
		ING2	HTR1A	C8orf59		CCDC40
		INHBC	SLC38A3	TAC1		C5orf66
		INPP5A	LRCH4 /// SAP25	COL28A1		PRKCQ
		INPP5F	POLG	DSTNP1 /// DSTNP1		MOK
		INPP5J	MYB	RAB1A		AAK1
		INSM2	ARHGEF28	TRAPPC1		BFAR
		INSRR	BIRC7	DHX36		ZNF568
		INTS10	GCG	PTCHD1		CXorf40B
		IP6K3	RPLP2P1 /// RPLP2P1	STARD7		BOLA2-SMG1P6
		IQCC	CCR8	AP1S3		TMEM119
		IQCH-AS1	ALS2CL	LINC01355		LOC100130283
		IQGAP2	TRIM37	MCTS1		PLEKHM1
		IQSEC3	ARHGAP6	CTB-78F1.1		AHSA1
		IRAK2	IL19	LOC100133130		PARP14
		IRF1	APOL1	ARHGEF7		NECTIN3
		IRF2	SMAD4	POMT1		RBSN
		IRF2BP2	COX11	NKAP		SHQ1
		IRF2BPL	CYCS	THEMIS2		RNF167
		IRF7	CNOT7	BBIP1 /// LOC100130175		ZNF566
		IRF8	MAST2	OSTC		DHX40
		IRF9	SSX2 /// SSX2B	APOL4		ZNF398
		IRG1	RPL35A	ME1		SETMAR
		ISG15	HOXC11	RPP30		FAM220A
		ISG20	ELSPBP1	RBM45		MCHR1
		ISLR	COPE	NUDCD1		RPF2
		ISLR2	TBL2	PRMT6		IGFBP5
		ISOC1	CUL4B	LINC00511 /// LINC00673		MFF
		ITGA11	RNF122	OTOGL		CLN6
		ITGA3	MKS1	PSMD11		TOMM20
		ITGB1BP1	BLM	WDR27		CLDN15
		ITGB5	TMEM248	CHCHD1		CRAMP1
		ITGBL1	CTLA4	GLB1L		TP53BP1
		ITIH6	FOXD2	LOC101929114		NSUN4
		ITPKC	IMP4	LRRN4CL		TLR5
		ITSN1	SCG2	BID		NR2F2
		IZUMO4	CACFD1	AP000462.1		BMP8A
		JAG1	DNAJC12	CYB5R2		ABCF3
		JAG2	ST8SIA5	GSTM2		CHST2
		JAK2	SLC39A14	TNFAIP8L3		ZNF230
		JAK3	PPP3CB	ZNF576		ATP6V1D
		JAKMIP3	FGF5	FKSG49		NOP14
		JPH4	RHBG	ZNF638 /// ZNF638-IT1		RAPGEF3
		JUN	CDR2L	PLGRKT		PARL
		JUNB	OR2H2	KXD1		SPRED3
		KANK4	EIF5	FRMD4A		CDC40
		KARS	PTPN11	CENPQ		SH3BGRL
		KAT2A	ZNF468	RAD52		ANKRD40
		KAT2B	LAT2	GCHFR		SUSD1
		KAT8	SLTM	SLC12A5		ORMDL1
		KATNA1	LIPA	IPW /// LOC101930404 /// PWARSN /// SNORD107 /// SNORD115-13 /// SNORD115-26 /// SNORD115-7 /// SNORD116-22 /// SNORD116-28 /// SNORD116-4 /// SNRPN		FCF1
		KATNAL1	SMAP1	PEA15		PIP5K1A
		KB-1183D5.14	GRSF1	CYP20A1		PLXNA2
		KB-1592A4.14	IQSEC2	ANKRD28		PLUT
		KBTBD11	MLPH	ARRDC4		ZNF253
		KCNA5	ITPK1	SWAP70		USO1
		KCNE2	TMEM59L	SSX1		CDH24
		KCNG3	DCC	EIF4H		PDXDC1
		KCNH2	APPL2	KARS		UBXN1
		KCNH3	EDF1	SLC26A10		CDC73
		KCNJ11	CHPT1	ZSWIM1		CALCOCO2
		KCNJ16	VAMP5	MCEE		ZNF787
		KCNJ4	TRIM13	HIST1H3G		STN1
		KCNJ5	RPA2	PTDSS1		PPIL4
		KCNJ9	FOXP3	LUC7L3		TSTA3
		KCNK16	PHOX2A	KPNA4		ZBTB8B
		KCNMA1	TJAP1	TMEM182		PAK1IP1
		KCNU1	LOC728392	BOLA2 /// BOLA2B		ZNF451
		KCTD14	LOC101927770	PRKCB		LOC93622
		KDELC1	NUPL2	VAMP7		RSL1D1
		KDELR1	ARMCX2	ALOX12P2		LIN37
		KDM6B	FBLN1	ZNHIT3		CDHR1
		KEAP1	KANSL2	FLJ41455		MUL1
		KHK	PDCD1	YIF1B		FGGY
		KIAA0040	DNASE1L3	LOC101927391		FURIN
		KIAA0100	DGKI	SYT9		FZD3
		KIAA0196	SLC4A1	MCM3		PPAN
		KIAA0247	ENTPD5	RPF1		GCHFR
		KIAA0319	MTRR	CCDC93		CIAO1
		KIAA1143	PRR11	TRPM5		MXD1
		KIAA1217	FIS1	ABHD14A-ACY1 /// ACY1		ZBTB21
		KIAA1239	FZD5	MIA2		CMIP
		KIAA1257	GPR20	C16orf91		RSAD1
		KIAA1324	STATH	BDKRB2		ZNF605
		KIAA1429	CCBL2	CACUL1		SMU1
		KIAA1462	SAE1	UBR5		EIF4A3
		KIAA1614	HIST1H4I	QSOX2		CCT6A
		KIF12	MIR1304 /// SNORA1 /// SNORA18 /// SNORA32 /// SNORA40 /// SNORA8 /// SNORD5 /// TAF1D	RBMXL1		UBE2J2
		KIF20B	CDHR5	CASP3		UQCC1
		KIF23	ACTR1A	DOLPP1		CEP192
		KIF26A	GABRB2	PCDH12		DDX39A
		KIFC2	LOC100288570	F12		HINFP
		KIFC3	CXorf57	TMED5		DAPK3
		KITLG	TBX1	PPP1R2		PPIP5K2
		KLF15	BMP1	RAB10		GPM6A
		KLF4	ZCCHC14	PGM3		SGTB
		KLHDC3	ABCB9	NQO2		GAS2L1
		KLHDC7B	HOXD9	RTEL1-TNFRSF6B /// TNFRSF6B		GPR89A
		KLHL23	OR5I1	INTS3		ZC3H18
		KLHL30	GRM3	SLC25A28		ATP2B4
		KLHL38	DNM1L	RNASEH2A		FKBP5
		KLHL4	TRA2B	AHSP		FZR1
		KLHL7	PRPF18	ARHGEF15		HPRT1
		KLK4	ODC1	MMAA		IBTK
		KLLN	DNAJC9	CCDC84		CDK20
		KLRG1	CCNJL	MRPS6		LOC101927151
		KNOP1	PITPNA	TMEM259		BAG6
		KRCC1	RNASE2	NAGS		PODXL
		KRT1	MEF2A	LOC100130428		PAF1
		KRT18	GPR4	TVP23A		RNF168
		KRT40	XRCC6	STARD9		SUCLG1
		KRT6A	CLCF1	RP11-307L14.1 /// RP11-307L14.2		RMND1
		KRT6B	PSMA3	PRO1804		RECK
		KRT6C	WDR55	EWSR1		CCDC47
		KRT8	TBL1XR1	CDK5RAP3		TOMM70
		KRT80	RBM25	TH		MARCHF2
		KRTAP1-1	WSB2	CUL3		PPP4R3B
		KRTAP2-3	PPA1	RPL7A /// SNORD24 /// SNORD36A /// SNORD36B		SLC25A46
		KRTAP2-4	PIK3IP1	ENTHD2		LMF2
		KSR2	TTC9	LINC-PINT		SUSD4
		KY	STX3	NSUN6		ALMS1
		KYNU	CEMP1	P2RX1		LRFN4
		L3HYPDH	MFGE8	STK40		SBNO1
		L3MBTL4	CCR4	SLC25A26		YIF1B
		LA16c-444G7.2	EVPL	CDC42		MAN1C1
		LACC1	SS18	RBM42		ZBTB18
		LACTB	DBH	CYP1A1		GMPPB
		LACTB2	GREM1	C2orf69		PCDHGA12
		LAMA4	NDUFA7	LOC100131496		C12orf4
		LAMB1	CYP11B1	NPAS3		THOC5
		LAMB3	MAPK8	GPATCH4		TSC22D2
		LAMC2	CACNB4	TENC1		TASOR2
		LAMP3	NDOR1	CREBZF		DENND11
		LAMP5	PRKCSH	ARPC4		SELENBP1
		LAMTOR1	EIF3J	LOC100422781		IGDCC4
		LAMTOR4	SERPINA7	LOC100506538 /// NDUFAF6		PCYOX1L
		LAP3	RAB3IL1	OBFC1		UCN3
		LBH	KCTD9	BRD7P3		PEG3
		LCE3D	KLHL22	PCDHGA4		TRAF5
		LDHB	LOC79999	ULK1		MPEG1
		LDLR	SLC9A7	PCDH9		TRIP11
		LDLRAD1	EMR1	GSK3B		WDR81
		LDLRAP1	EFNA2	FAHD2A /// FAHD2B /// FAHD2CP		MECOM
		LECT1	B3GNT4	MMP10		DZIP1
		LEO1	PTPN21	ARHGEF4 /// LOC101930241		MAP3K7
		LEPREL2	FRY	EIF3D		INTS10
		LEPREL4	B3GNT3	DIO1		RABGGTB
		LFNG	SNX3	FAM129B		DYNC2H1
		LGALS14	APOOL	MIR6840 /// PILRB /// STAG3L5P-PVRIG2P-PILRB		SNW1
		LGALS4	TP53I11	ERVH-1		RAB2A
		LGMN	RNF14	KLRB1		PON2
		LGR5	KRT38	LRRC16B		DHX16
		LIAS	CDC37P1 /// CDC37P1	RP5-855D21.1		BAIAP2-DT
		LIF	BGLAP /// PMF1 /// PMF1-BGLAP	NPTN-IT1		SLBP
		LIFR	SNRPE	DDX17		CPSF1
		LILRB4	EMC10	FBXW11		LINC02197
		LIMD2	GOT2	HPRT1		TTC3
		LIMK2	PDLIM7	FAM66C /// LOC101928910		ZNF587B
		LIN7B	NGFR	FAM135A		ABHD18
		LIN9	CD1A	MAPRE1		TIPRL
		LINC00205	MOAP1	HDHD1		PRKCZ
		LINC00261	C2CD5	USB1		NBAS
		LINC00315	GLRA2	SAFB2		ERH
		LINC00478	CCDC186	MROH7		PLD1
		LINC00595	PRPF4B	ATP6V1D		C5orf51
		LINC00605	AOC1	C2CD5		TIMM17A
		LINC00641	MRPL15	ASL		NCALD
		LINC00662	AK021933	WIPF3		RBM15
		LINC00677	PNMA1	CLK2		NEURL1B
		LINC00683	TCEAL1	IGHA1 /// IGHG1 /// IGHG3 /// IGHM /// IGHV4-31 /// LOC100293211		FKBP14
		LINC00704	TMEM183A /// TMEM183B	LINC00967		SEMA5A
		LINC00849	PEG3	NUDT1		SSBP1
		LINC00857	ADORA3	SAE1		MIA2
		LINC00880	ARF4	CDCA4		AMIGO2
		LINC00882	TNNT1	KLHL3		SPR
		LINC00883	RNASEL	NOL10		PROS1
		LINC00930	SNX7	PIN4		GTF2H5
		LINC00948	DGCR6L	RALBP1		PLSCR4
		LINC00958	PLCB2	VPS26A		EMCN
		LIPG	PLA2G2D	C20orf24 /// TGIF2-C20orf24		NPM1
		LIPH	NOX5	NDUFA1		NR4A2
		LIPM	COX5A	BC043266 /// RP4-568F9.6		ABHD10
		LITAF	FUBP3	SLC25A24		ARF1
		LIX1L	GABARAPL2	PSMB3		RARS
		LMAN2L	ANKFY1	C1orf116		KRR1
		LMLN	FLJ22184	RBM5		EDC4
		LMO2	PLK3	ADAMTS12		RWDD1
		LMO7	SMARCA5	TTC28-AS1		FOXJ1
		LNPEP	FCER1A	LOC101929112		TTC26
		LOH12CR2	TFAP4	GTPBP4 /// IDI2		KCNK1
		LPAR1	C1orf159	KLF16		ADGRF5
		LPAR2	B4GALT5	CMAHP		CSNK1A1
		LPAR3	DEFA6	RP1-118J21.25		CPSF7
		LPGAT1	CEP76	LINC01296 /// LOC100653149 /// LOC102725127		C1RL
		LPHN1	LILRB1	RP11-792A8.4		PRRC1
		LPO	INPP1	CX3CR1		CLCC1
		LPPR1	MKKS	CERS1 /// GDF1		ANKIB1
		LRCOL1	GAD2	LOC100133039		NXF1
		LRFN1	CETN3	DKFZP586I1420		RPS6KA1
		LRFN4	CTB-102L5.7	GNRHR2		TCEA1
		LRP10	NDST2 /// ZSWIM8-AS1	SLAIN2		RHOBTB3
		LRP11	BCL3 /// MIR8085	FOXC2		TGM2
		LRP1B	CBFB	KCNAB1		SLC6A9
		LRP3	MFN2	SRR		PAK1
		LRPPRC	FBXO3	B3GNT7		LPAR6
		LRRC17	AMH /// MIR4321	INIP		ZNF324B
		LRRC20	ART1	NDUFS3		RCAN3
		LRRC26	BARX2	CD52		ZNF324
		LRRC32	HLX	TAPT1-AS1		NUDT22
		LRRC34	GLYAT	VPS9D1		DUBR
		LRRC36	PACSIN3	VPS13A		ZZEF1
		LRRC39	PMEPA1	TUBA3C /// TUBA3D		MCM7
		LRRC8D	GRIN2B	CCL20		SURF6
		LRRN1	CRYZ	PIGA		KHDC4
		LRRN4CL	PSD3	CLP1		FBXO16
		LSM2	NARS2	C7		UBE2D2
		LSMEM2	ATP6AP2	ANK1		UTP18
		LSR	CORO7	TSPY1		ZNF621
		LTA	BTF3	NR0B2		LSM3
		LTBP1	RP11-403P17.4	ENGASE		DNAJC16
		LTBP2	TMEM131	SQLE		MED29
		LUCAT1	HSD17B11	PON2		CCNH
		LURAP1L	ZC3H7B	NHP2		SPRED2
		LY6E	ZFC3H1	ENOPH1		MON2
		LY6G5C	IL3	TTC18		INTS4
		LY86	MDH1	SFN		TTC9C
		LYN	CTSO	ZNF638		PPM1G
		LYPD3	HNRNPF	LRRC59		MLLT3
		LYPD5	MEGF9	TIPARP		USB1
		LYSMD4	ZNF721	DKFZp434J0226		SLC25A42
		LYVE1	EEF1D	LXN		ARMCX3
		MAB21L1	RTEL1	FAM160B2		C1orf127
		MACC1	HOXA10-HOXA9 /// HOXA9 /// MIR196B	C5orf22		DOCK4
		MAFA	BCL7A	TCTN1		NME7
		MAFF	ASXL2	CSF3R		MTRF1L
		MAFK	CSPG4	CYP21A1P /// CYP21A2		IKZF5
		MAGED1	TLE6	PLP2		EVL
		MAGED4B	MRPS27	KATNA1		HNRNPUL1
		MAGEE1	KRT33A	RAPSN		LYNX1
		MAGEH1	GNE	SEC14L2		RASSF6
		MAGT1	PLA2G3	TMOD3		CORO1B
		MAMDC2	C14orf132	LYN		DISP3
		MAML2	TNFRSF8	COQ4		VAPB
		MAN1A2	EVC	NUDT15		ARCN1
		MANBA	MBTPS2 /// YY2	LARP1B		UGGT1
		MANSC1	ELP4	ERO1L		C11orf58
		MAOA	MRPS11	RAB38		AZIN2
		MAP1LC3A	PUS7	PSMB8		SEZ6
		MAP2K3	ERLIN1	UGP2		CD99L2
		MAP3K12	CDC45	CDH12		SUFU
		MAP3K15	EBF2	MCF2L-AS1		ZBTB43
		MAP3K8	TMBIM6	CD82		TPT1-AS1
		MAP4K2	PRODH2	MYO1E		BDH1
		MAPT	LGR5	CERCAM		CHCHD3
		MARC1	AGA	SNX6		SAMM50
		MARC2	CMTM6	IRF8		ADK
		MARCKS	CTSC	GZMH		NBR2
		MARVELD1	PQBP1	HNRNPA3		ENTPD1
		MASP1	FLCN	PTP4A1		RPS19BP1
		MAST1	EIF3E	LOC101928189 /// RSRP1		FANCF
		MAST4	TMEM104	JUP		SEC61G
		MAT2B	ELF5	GOLGA7		WHAMM
		MATK	DUSP12	GS1-164F24.1		ITGA1
		MATN2	EFEMP2	MELK		INKA2-AS1
		MATN3	HIST1H2AG /// HIST1H2AH /// HIST1H2AI /// HIST1H2AK /// HIST1H2AL /// HIST1H2AM	GSAP		RNF113A
		MB	NLRP3	MSH5 /// MSH5-SAPCD1 /// SAPCD1		RPN1
		MB21D1	FAM118A	EPPIN /// EPPIN-WFDC6		C14orf93
		MBD6	CDC123	MYO18A /// TIAF1		LINC01843
		MBOAT2	ZNF451	G3BP1		DENND3
		MCCC1	ALDH1A2	MAPKAPK2		DNAJC1
		MCF2L2	NDUFB6	UBN2		WIPI2
		MCL1	KLHDC4	LOC730102		SEMA4G
		MCM6	CASS4	ALDOC		ATAD2
		MCOLN3	SLC6A8	CLVS1		GK
		MCTS1	AC068039.4	BZRAP1		FAM126B
		MDFI	KCNS1	RGS1		SLC17A9
		MDGA1	PYHIN1	PEX26		PICK1
		ME3	ZNF330	CD1C		TRIM21
		MEAF6	UQCRFS1	IRAK1		MINDY1
		MECR	TNPO1	PLEKHA3		SACM1L
		MEF2C	TMEM50B	PTPN4		ARL5B
		MEGF11	RTN3	PRPF4		MATN1
		MEGF6	DSCR4	LOC101929855 /// LOC102724851		JUND
		MERTK	GRAP2	MLLT4-AS1		CDK11B
		MESDC1	CD3D	LOC285419		DYNLT3
		MESP1	LEP	FAM114A1		PHF5A
		MEST	MTCH2	LRFN1		AP4B1
		METRN	SIRPA	CHMP4B		BAIAP3
		METTL10	LOC101927051	CENPT		SIX5
		METTL17	TBC1D9	TEX30		ATOH8
		METTL20	DENND1C	CHD2		FKBP9
		METTL7A	SLC13A4	EPHB2		MBOAT4
		METTL7B	CTC-338M12.4	JAGN1		SMN1
		MEX3A	RP5-1170D6.1	DFFA		TRNP1
		MFAP2	POT1	LOC102724275		FBXW2
		MFF	NCKAP1L	NQO1		RPTOR
		MFNG	EPB41	RP11-295G20.2		SNX2
		MFSD2A	AOC3	RASSF1		TYW1
		MFSD3	TBCE	RP1-151F17.2		ZFP36L2
		MFSD6L	TM4SF5	DCTPP1		STAB1
		MGAT2	USB1	OBSL1		SLU7
		MGAT5B	ATP6V0A4	ZFAS1		ZMYND10
		MGC20647	NCAPH2	GABBR1		PLA2G12A
		MGMT	B4GALT2	CD74		FOSB
		MGP	RBM38	C4orf32		CRIP2
		MGST1	ARMCX5	CCBL1		NEPRO
		MICAL1	MIR3658 /// UCK2	LOC101928483		NCBP1
		MICALL1	IGHA1 /// IGHA2 /// IGHD /// IGHG1 /// IGHG3 /// IGHM /// IGHV4-31	USP32P2		ZNF184
		MICB	IGLJ3 /// IGLV3-19 /// IGLV3-19	SRFBP1		METTL1
		MICU2	LOC100505498	LOC101928424		ELK1
		MIDN	DTWD1	ELOVL5		THOC1
		MIER2	STXBP1	EEF1E1		SLC25A25
		MIF4GD	ABCD1	SEC13		CEP350
		MIR143HG	CRNKL1	MFAP4		CBWD5
		MIR146A	MYBPC3	CEP44		SPEF2
		MIR155HG	C20orf195	RPN2		STX4
		MIR24-2	PDE3A	NUP37		CANT1
		MIR4720	PER2	NPHP4		TBRG1
		MLF1IP	IQCA1	FAHD1		PTPRU
		MLKL	PARL	NAV2		NOM1
		MLST8	PTPRN2	TRAM2-AS1		CROT
		MLXIPL	DRD5	BCL10		TRAPPC12
		MMAA	ACAA2	RP11-873E20.1		ADIPOR1
		MMACHC	HOXB1	PRMT5-AS1		UNC119
		MMP1	HOMER3	LOC101930630 /// STRC		MBD2
		MMP10	DERA	DENND3		TXNDC5
		MMP11	EIF3D	ACTR3C		CD14
		MMP15	GRIA1	SMPDL3A		TNS2
		MMP25	SRCAP	LOC102724975		SRR
		MMP3	FASTKD3	WNT10B		MX1
		MMRN1	SKIL	CSNK2A1		CHST9
		MMS22L	RAB6B	Y16709		TSPAN14
		MN1	DBF4B	MED6		EIF2B1
		MNX1	SCGB2A1	CDK6		ECHDC3
		MOB1A	LILRB3	MAL2		FKBPL
		MOB3C	SRRM1	HDC		DNMT3A
		MOCS2	CASP4	ZNF174		RNF5
		MOV10	ADH7	TOMM40L		IL10RB
		MOXD1	RCN2	DPP3		TGFBR3
		MPC1	CCL22	MAPK1		HEXB
		MPG	PLA2G2F	MFSD2A		SLC25A53
		MPP1	RPL15	IGHV5-78		PBXIP1
		MPV17L	GFAP	GSR		CACUL1
		MR1	SLC35E3	CYTH1		RANGAP1
		MRAP2	HPCA	LOC100128288		INPP5F
		MRGPRX3	PDCD6IP	ZRANB2		TMEM11
		MRM1	SNRNP27	GRIA4		METTL16
		MROH7	SAMHD1	PTPMT1		CCDC88C
		MRPL12	C11orf73	LINC00893 /// LINC00894		GCN1
		MRPL14	VCY /// VCY1B	CDK10		EARS2
		MRPL15	GDPD3	TMEM33		ZBTB5
		MRPL24	NFE2L2	HAUS1		ATG5
		MRPL34	RRN3	DUSP14		MMP15
		MRPL40	REST	AIFM1		TSHZ2
		MRPL48	LINC01314	MGC4294		ROGDI
		MRPS2	ZFR2	CAPN3		TRIM39
		MRPS26	AFF2	C19orf26		JADE1
		MRPS27	MB	ADAT1		NDN
		MRPS34	CSNK1G3	CXCL8		ST3GAL2
		MRPS7	PBOV1	CDK14		GNG10
		MS4A6A	TRAPPC13	MAPK8		ST3GAL5
		MSRB1	IKBKE	ATP5J2		VKORC1L1
		MSX2	TRAIP	RBM17		CAMSAP1
		MT1E	ETNK1	ADAP2		CEP83
		MT1F	CD79B	DEFB124		MYO9A
		MT1M	SLIT2	TBC1D2B		SPATS2L
		MT1X	APOC2 /// APOC4 /// APOC4-APOC2	BRI3BP /// THRIL		DXO
		MT2A	CARKD	SRP14		TXNL1
		MTA1	HBS1L	RP11-796E2.4		ZNF850
		MTCP1	SMG5	ITPR3		PWWP2B
		MTF1	WIZ	CCDC101		SESN2
		MTHFD1	PTPRD	TTC31		LRRC4
		MTHFR	MYOD1	TMEM38B		KDM2B
		MTIF3	REV3L	EHMT2		TXLNG
		MUC15	SSTR5	POLR3C		HEYL
		MUC16	ERP44	RP11-135A1.2		C7orf26
		MUC20	MAGEH1	LOC646014		TRIM35
		MUC4	MKL2	TSG101		PDE4B
		MVB12B	PAAF1	KANK1		SLC1A4
		MX1	DMP1	RPS6KA1		CSNK2A1
		MX2	CDC73	RP2		ISY1-RAB43
		MXD1	SNTB1	LOC101928173		CHPF
		MXD3	SCCPDH	EME2		RASA4B
		MXRA7	GLOD4	SARNP		TNPO3
		MXRA8	SEPT11	MSANTD3		SMARCA4
		MYCT1	HMBOX1	SCN7A		OCIAD1
		MYD88	DCUN1D4	DDA1		C8orf33
		MYEOV	SPCS2	MST1		HYKK
		MYEOV2	CYP4A11	ZBTB6		TERF2
		MYH6	OR1E1 /// OR1E2	ODF2		ACBD7
		MYH7	TNFSF12 /// TNFSF12-TNFSF13	LOC100130417		ALG14
		MYL6B	LRRN2	COA7		FAF1
		MYL9	RNF185-AS1	LOC100130429		TRIB1
		MYLK3	TOR1B	LOC100129518 /// SOD2		SLC37A4
		MYO1B	USP34	ELF3		RSPH3
		MYO1G	ACLY	LOC285889		DOK3
		MYOCD	NPFFR1	ACVR2A		PDIA6
		MYOM1	WWP1	AC012065.7		RBBP5
		MZF1	KISS1	CD69		FEM1A
		MZT2B	VRTN	TMEM62		HEATR5A
		N4BP2L1	ORC5	LOC101928288		SLC25A30
		NAALADL2	NRG2	LHX4-AS1		ATP1B1
		NACA	ZNF160	LINC01420		SOX13
		NACC2	SASH3	HN1L		DNPH1
		NAE1	TAF1C	STX3		TRPM4
		NAGK	SLC19A3	SMOX		ARL6IP5
		NAGS	TNS4	HNRNPAB		CDK4
		NAMPT	DCAF4	S100B		C16orf71
		NAMPTL	OSBPL7	FOXJ3		MAP3K10
		NANOS1	ADRA2B	CHRM3-AS2		ZNF432
		NAP1L3	GLUD1	ANKRD10		FGD5
		NAPA	FZD8 /// MIR4683	GRPEL1		AVL9
		NAPEPLD	MYOG	YARS		ANK3
		NAPG	ASNS	FRMPD1		MVK
		NAT8L	ARG2	MRPL39		ATXN3
		NAV1	CYHR1	SLC6A16		LIMA1
		NBEAL2	DBET /// DUX4 /// DUX4L1 /// DUX4L2 /// DUX4L24 /// DUX4L3 /// DUX4L4 /// DUX4L5 /// DUX4L6 /// DUX4L7 /// DUX4L8 /// LOC100288289 /// LOC100291626 /// LOC652301	RP11-61L19.3		MOCS1
		NBN	RPS6KB2	IL17D		METTL24
		NCCRP1	NAT2	CHRDL2		TBP
		NCF1	GGNBP2	AMFR		BLOC1S3
		NCOA7	SPAM1	LYRM4		ABCE1
		NDC80	ENG	GSTO1		MYORG
		NDFIP2	DPF2	PRICKLE3		PWP1
		NDN	C22orf29 /// GNB1L	RP11-138I18.2		PPP1R13B
		NDST3	NCR2	AMICA1		TPRA1
		NDUFA10	EPS8L3	OSER1		LURAP1L
		NDUFA11	DKC1 /// MIR664B /// SNORA56	MRPL40		ZNF710
		NDUFA12	CHST5	GALNT16		STK11
		NDUFA3	KCNN1	LOC100506990		DVL3
		NDUFA9	LRRC40	AX748339		USP10
		NDUFAF6	TSPYL5	CTSW		RASGRF2
		NDUFAF7	INPP5D	ZGLP1		SRC
		NDUFB1	PLXDC1	TUBB2A /// TUBB2B		EML2
		NDUFB10	TBC1D2	FOXD2		SNU13
		NDUFB9	TH	KIAA1377		HAPLN3
		NDUFC2	REEP5	NDNL2		DDC
		NDUFV1	XPO1	SAMD1		SCAMP3
		NECAB2	S1PR2	ATOH7		CYB561
		NECAB3	HBE1	UBE4A		SF3A1
		NEGR1	F12	SPATA18		NFIC
		NENF	CDK3 /// TEN1-CDK3	CDK2AP2		ATP1A1
		NES	GOT1	CSF1R		NCMAP
		NEURL	FCGR2C	TPM1		MDM4
		NEUROD1	HDAC7	KRT8P12		OPRD1
		NEXN	ATP6V0A2	ZNF367		EEF1AKMT3
		NF2	A4GALT	MIR31HG		ARHGEF28
		NFAM1	EGR4	TDRD9		TRIB3
		NFATC2IP	NOP10	CLK1		PPARA
		NFKB1	BTN2A1	YWHAZ		HTRA1
		NFKB2	PLEC	RRS1		EIF3M
		NFKBIA	NEU3	LOC101930112 /// SPG7		GID4
		NFKBIB	RAPGEFL1	SUDS3		RAB1A
		NFKBIZ	SMC4	MTFR1L		ARPC5L
		NFYB	ZFP36L2	ARNTL2-AS1		MAPK7
		NGFRAP1	IDUA	C6orf164		FASTKD5
		NID2	RNF5 /// RNF5P1	OPTN		DMWD
		NIM1	EBLN2	CASK		SDS
		NIN	SNAPC4	TMEM130		RGS4
		NINJ1	PLD1	LCN12		CD93
		NINL	LRRC8B	ZDHHC5		DOHH
		NIPAL2	IL13RA2	EIF4EBP1		SEMA6B
		NIPSNAP1	INPP5F	BTN3A1		ITGB5
		NIPSNAP3B	INS	DRG1		STAG1
		NIT2	RHOD	A2M-AS1		MYDGF
		NKD2	ABCG5	FAM96B		CHMP7
		NKX2-2	ZNF614	CCDC18		DNTTIP2
		NKX3-1	HAND2	LOC283713 /// OTUD7A		COL15A1
		NLE1	FAT1	HLF		AMOT
		NLRC5	DCLRE1C	FAM156A /// FAM156B		OLIG1
		NLRP12	MIR21 /// VMP1	AKT2		DHFR2
		NME1-NME2	DRICH1	CCDC25		STAT5A
		NME3	MRS2	SPTY2D1		PIEZO2
		NME4	ZNF460	C16orf86		GHITM
		NME6	TMCO3	AK054988 /// TPTE2P1 /// TPTE2P1		FXYD6
		NMI	TTTY2 /// TTTY2B	RP1-102H19.8		NLGN2
		NMRK2	CNGA1	BC039673		TOGARAM1
		NMT1	ANO2	ELOVL1 /// MIR6734		EIF2S2
		NMT2	SESN1	RING1		LIMK2
		NMUR1	AMPD1	WDR73		LGMN
		NOD2	TNIP1	ACVR1		ALYREF
		NOS2	HLA-DOB	MSS51		MFSD1
		NOSTRIN	MAPK1	ZNF436		ZNF226
		NOVA2	ADRB1	PNP		SPCS2
		NPAS1	TRIM15	MRPL32		RAB29
		NPBWR1	MISP	RPRML		RNF43
		NPM1	ATP5A1	PSME4		ABCC9
		NPM3	RENBP	C19orf66		LMAN1
		NPPB	DYNLT3	ZNF76		VPS4B
		NPRL3	BRAF /// KIAA1549	MAU2		ISL1
		NPTXR	MFNG	DIAPH1		LINC01614
		NR5A2	NBN	SERPINB2		DDX47
		NRARP	ANXA2P1	BIN2		SUDS3
		NRGN	DNAH17	SYNE2		LOC100996740
		NRIP2	LINC00597	C10orf2		OAS1
		NRK	YIPF2	ATP6V1E2 /// FLJ41757		ABCC1
		NRP2	LOC647070	ATCAY		GIHCG
		NRSN1	DBF4	ARNTL2		GTF2H1
		NRTN	ARL3	EIF5 /// SNORA28		UBN2
		NRXN2	RABGGTA	RRAS2		PMPCA
		NSA2	C19orf40	SNAPC1		EAPP
		NSG1	KRTAP5-9	MECR		ATP5F1E
		NSMCE1	SLC20A1	BC045788		LINC01534
		NSMF	PMS2 /// PMS2CL	CTBP1		NCS1
		NT5C3A	EIF2B2	ZNF276		ROBO4
		NT5DC2	ZP2	MMADHC		RAB11FIP5
		NT5M	ZNF576	C21orf33		PPP6R1
		NTAN1	NAP1L3	FPR1		HIPK1
		NTHL1	DSE	PRELID1		DDI2
		NTRK2	JAK3	PPTC7		RB1
		NUAK2	CDKN2AIP	NFKB2		ARMH4
		NUB1	MAGED2	PPDPF		ATG4B
		NUCB1	CHRNG	NPM1P22 /// NPM1P22		RTN4
		NUDT13	FBXO40	GLIS2		TMEM38A
		NUDT14	CALCR	MIR34A		RSBN1
		NUDT16L1	INHA	MAP1A		RPS6KB2
		NUDT3	ATG3	LOC101930578 /// TPTE2P2		ARL5A
		NUDT8	CD74	PXDN		DZIP1L
		NUF2	PRKAR2A	PPP1R15A		FAM114A1
		NUGGC	RAI1	ZDHHC4		TMEM97
		NUP133	ARF3	ATP5I		ZNF667-AS1
		NUPR1	XPC	PIP4K2C		ZNF454
		NUPR1L	MGAT2	RGS3		MAEA
		NYAP2	EIF3I	FOXO1		REXO1
		OARD1	EFNB1	C12orf73		EIF3J
		OAS1	DRD2	HSCB		FOXA2
		OAS2	TAF1D	ME2		HOPX
		OAS3	GHITM	PGGT1B		CDC6
		OASL	CD300A	NRBF2		NIPAL2
		OAZ3	LIN7C	SLC25A16		VPS54
		OBFC1	AKR1B1	MRE11A		RIMS1
		OCIAD2	MIR6125 /// USP15	MAPKAPK3		POLRMT
		ODAM	OCRL	ATF7IP		TXNL4A
		ODF3B	LIME1	KIF21A		AKIP1
		ODF3L2	SCG3	TEN1 /// TEN1-CDK3		ENTPD7
		OGDHL	HP	RPGR		LPP
		OGFR	RSBN1	ADCK3		ISLR
		OGFRL1	SHQ1	FAM153A /// FAM153B /// LOC100507387		RAB22A
		OLA1	ECHDC3	SNRPF		CMPK1
		OLFM2	EHMT1	ANXA3		AHCTF1
		OLFML2B	CNN2	FBXO28		TIMM9
		ONECUT2	SH3GLB1	KRT72		INF2
		OPALIN	PMPCA	MLIP		PDE6D
		OPHN1	SLC39A7	ZMPSTE24		ZFP41
		OPTN	HLA-DRB4	C14orf39		DTX3L
		OR2A4	FLJ11292	SDE2		LTBP3
		OR2A7	NCK1	PDX1		LZTS1
		OR52N4	MLC1	GLTP		FBXO5
		OR7E24	APOBEC3G	CEACAM19		TMEM259
		OSBPL1A	DEF8	NUMB		ZNF830
		OSER1-AS1	RP11-457I16.2	MCM6		KLHL35
		OSGEPL1	SDHC	RRM1		NFATC4
		OSMR	GOLPH3	RP11-10K16.1		TPPP
		OTOA	CPED1	CCDC112		TMEM109
		OTUB2	LOC100130741	AHCY		KCNK16
		OVOL1	QRICH1	NME1-NME2 /// NME2		LIN54
		OXGR1	NDUFA1	KRT81		PRDM4
		P2RX3	CLASRP	SH3RF2		PLXNB1
[truncated: 6,669 more rows]

## Sheet: DEGS_Combined
T1D	T2D	BFA
A4GALT	SYBU	ARF4
A4GNT	MFN1	CYB5D1
AADAT	FUT6	ZNF598
ABCB1	HAX1	MFSD2A
ABCG4	TCEA1	RRP12
ABHD14B	ERO1LB	HYOU1
ABI3BP	AASDHPPT	HSPA5
ABRACL	PRDX4	HERPUD1
ACE	SRP72	CYCS
ACKR3	APEX1	SLC30A8
ACP2	SERBP1	JMJD6
ACP6	IAPP	SYVN1
ACSBG2	SPCS1	KIAA0513
ACSL4	IARS	LZTFL1
ACSL5	PSMG1	MYBBP1A
ACSM3	STOML2	POLR3D
ACTA2	UPF3A	SLC31A1
ACVRL1	CDC40	GPT2
ADAMTS9	IPO5	MAP1LC3B
ADARB1	ARMCX1	C17orf107
ADAT3	DNAJB9	IQSEC2
ADCK2	TM9SF2	ZCCHC7
ADH5	USP1	SERP1
ADIPOR2	PDIA6	MANF
ADNP2	HSPG2	NPRL2
ADORA2A	SECTM1	SELENOS
AGER	ACSL1	SRPRB
AGFG2	GPR89A /// GPR89B	GOSR2
AGO2	C7orf43	DPH2
AGR3	FNDC3A	SUPV3L1
AIFM2	WDR12	VOPP1
AIMP2	UNC50	TBC1D15
AKIRIN2	ARCN1	NDEL1
AKR1B1	CHMP3 /// RNF103-CHMP3	KDELR2
ALAS1	MICB	TIMP2
ALDH1B1	NMT1	USP36
ALDH5A1	SLC28A3	MSTO1
ALG12	PRKCZ	SLC35E1
ALKBH1	ISOC1	NCDN
ALPL	FBXL5	NUB1
AMHR2	CLK1	MPC1
AMT	TMX4	ADAMTS2
AMZ2	CXorf40B	ZFPL1
ANAPC1	BCL2L2	SRP54
ANGEL1	LSM12	POLR3E
ANGPTL6	UBE2D2	CNOT9
ANKRD1	CYP3A4	EPB41L1
ANKRD13B	SRSF10	LOC728392
ANKRD22	PCSK1	FTSJ1
ANKRD27	MRPL3	ODF2
ANKRD29	DHX29	PGM3
ANKRD46	WDR61	PRNP
ANO1	BLOC1S5-TXNDC5 /// TXNDC5	PGAM5
ANTXR1	PSMD11	PI4K2A
ANXA3	SEC63	DHDDS
AOC1	GPRIN2	NXT1
AP1B1	PPM1A	GOLGA3
APBA3	COL16A1	PHF20L1
APLN	PIKFYVE	NOLC1
APOH	SRSF6	CRIPT
APOOL	MAPRE1	MAFB
APOPT1	PLAGL1	BSDC1
AQP1	UBE2M	PNO1
AQP7	CAMKK2	TMEM41B
AQP7P1	PPP1CC	DNAJA3
ARAP1	G3BP2	SEC13
ARF5	TMEM70	RPGRIP1L
ARHGAP26	CCDC47	CENPJ
ARHGAP31	LMBRD1	C11orf24
ARHGAP39	HOXA3	ATG13
ARHGEF10L	HSPE1	UFM1
ARHGEF19	TMED10	SIAH2
ARHGEF28	TMEM251	IMP4
ARHGEF3	GABRP	YRDC
ARL4C	BET1	SNHG1
ARMCX6	ECI2	NOL6
ARR3	TOP3A	MAX
ARRB2	SEL1L	YTHDF1
ARRDC4	ANKRD46	IFRD1
ARSF	RBP4	HSPA9
ASPN	MAP3K11	ZNF140
ASTN2	TTC19	OGFOD1
ATF7IP2	PEX2	PMM2
ATG12	ATP5B	TUBA1A
ATG13	TEX261	SRPRA
ATG2A	ZNF518A	CCDC149
ATIC	GAL3ST4	NAT9
ATP5F1	LRRFIP1	TMEM263
ATP6V1G2	PFN2	ATF6
ATRAID	HMGB1P12 /// HMGB1P12	KDELR3
ATXN7L3	SLC25A5	RIOX2
B3GALNT2	NUCB2	HSP90B1
B3GNTL1	ILF2	SCGN
B4GALNT4	UAP1	UBE2B
BAALC-AS2	MCM3AP	NARS
BAAT	CCL5	ATF3
BACE1	DAP	COQ10B
BACH1	MBD1	OSBPL2
BAP1	EEF1A1	ATG101
BATF3	AHCY	BET1L
BBS2	PIGT	SELENOK
BCAM	SLC35B1	DNAL1
BCDIN3D	CEND1	RALA
BCL6	SLC9A6	ARMCX1
BCOR	CSNK2B	KDM6B
BDKRB1	C5orf22	EFR3B
BEST1	CREB3L1	PNPLA8
BFSP1	EMC2	CEP70
BHLHE41	FZD9	TMEM39A
BID	VPS53	FARSA
BIRC3	NELFCD	NRBF2
BLCAP	SGCE	TMEM248
BLMH	EXOC1	OXNAD1
BMP4	USO1	ZNF395
BNIP3L	AKAP11	TOP3A
BPGM	TMC6	ORMDL3
BRCC3	PLCB3	SCFD2
BRD4	MYH14	RBKS
BRWD3	TMX1	TMCO1
BSCL2	TNFRSF14	PCNX3
BTBD9	DCTN6	NQO1
BTN2A2	IKBKAP	GOT1
C11orf53	XPOT	ALKBH5
C11orf71	UBE2E3	POLE3
C12orf60	ZNHIT3	MNT
C12orf75	NSMAF	INTS6
C14orf105	CACNB1	RASSF1
C14orf169	GALC	SCD5
C15orf41	PTGES3	BLZF1
C15orf48	BEX4	ISG20L2
C1orf116	ZNHIT6	COASY
C1orf162	PTS	GOLGA5
C1QTNF1	ZFAND1	GSN
C1QTNF3	GTF3C3	ZNF608
C1QTNF6	OXSM	BMF
C1R	MIS12	UCHL5
C1S	MBD3	GNL2
C20orf96	GOLGA5	NEURL4
C21orf62	GTSE1	HCG18
C21orf62-AS1	CCNF	MAP1A
C22orf39	IPO4 /// TM9SF1	BCAS2
C2CD2L	KDELR2	EIF2S3
C2orf44	ZNF358	LAPTM4B
C2orf74	PRPS1	COG6
C3orf18	CRKL	DNAJC25
C3orf67	UNC119B	DDX50
C4orf3	HAT1	TMEM104
C5orf28	SUCO	TSN
C6	TSPY1	SRA1
C6orf106	MIR6872 /// SEMA3B	SEC16A
C6orf223	ALG5	SCYL1
C8orf59	SF3B1	ENG
C9orf9	PIK3R4	ANGPTL2
CA8	SRSF7	SDC2
CABLES1	MKRN2	GZF1
CAD	DCTD	TPMT
CALHM2	SRSF8	GNL3
CALML4	LOC101060321 /// LOC101060351 /// LOC101060376 /// LOC101060389 /// LOC102723859 /// LOC102724862 /// TBC1D3 /// TBC1D3C /// TBC1D3F /// TBC1D3H	PPP1R11
CARHSP1	MLH1	ETF1
CASP5	ITGB4	GDA
CASP6	DLD	LINC02693
CASP7	PSMD6	TCF4
CATSPER3	DESI2	ATAD3A
CBX1	FGF16	ALDH18A1
CC2D2A	RSL1D1	CREB3
CCDC102B	TRMT5	GPR107
CCDC112	NUP37	TARSL2
CCDC113	DDX46	XPNPEP3
CCDC117	ERC1	SGTA
CCDC121	GUCA2A	BRIX1
CCDC142	SH3PXD2A	SENP2
CCDC152	L1CAM	C2CD2L
CCDC189	RPE /// RPEL1	GON7
CCDC191	METAP2	DDX42
CCDC34	POP7	FAM8A1
CCDC43	CXorf40A	GCC2
CCDC6	EDEM1	SIKE1
CCL2	CAPN7	CENPN
CCND2	RABGGTB	SLC35A2
CCNI	MUC3B	TMEM120B
CCNK	C18orf32 /// RPL17 /// RPL17-C18orf32 /// SNORD58A /// SNORD58B /// SNORD58C	YIF1A
CD209	TUBG1	TULP3
CD247	ANAPC13	GORASP2
CD300LF	USP16	TPD52L2
CD302	FAM179B	IPPK
CD40	PPIP5K2	PPP2R5B
CD7	SCUBE3	LONP1
CD82	TMEM50A	SEC63
CDC16	PAICS	STK19
CDC25B	RIN3	BBOF1
CDC5L	NECAP1	SF3A3
CDCP1	SERPINI1	SMPD4
CDH24	HMGN2	NOL7
CDK8	NME7	CABP7
CDKL2	TOMM20	DERL1
CDKN2AIPNL	TMX2	GTF2F1
CDX1	MAST4	STX5
CELF5	M6PR /// PHC1	AKAP17A
CENPBD1P1	CST8	POFUT2
CENPH	SDHD	BAG5
CEP104	ATP6V1A	MPHOSPH10
CEP290	ENPP2	SELENON
CEP57L1	AP2M1	E2F4
CEP68	XBP1	SLC25A38
CEP85	SYN3	ZNF263
CFAP126	CUL1	RTL10
CFDP1	PEX3	CDK2AP2
CFI	KLHDC2	TMX2
CGB7	LMNA	STC2
CGREF1	NDFIP1	CHD3
CHAD	KLHL18	SRP72
CHAMP1	SDC2	DPP9
CHCHD4	C5orf28	ST5
CHGA	SLBP	ZNF550
CHI3L2	DTX4	TAF13
CISH	TJP3	EAF2
CLDN15	TGFBR2	ERP44
CLDN9	OR2C1	SENP5
CLIC3	EED	JMY
CLINT1	SEP15	RPP14
CLNS1A	SEC23B	UBFD1
CLPTM1L	PODNL1	TIMP3
CLU	PJA2	RAD1
CLUL1	RBM23	GARS
CMBL	TXNDC15	MED10
CMC4	BRD4	PCDHGC3
CMTM7	HDDC2	WDR55
CNDP1	PDGFB	WARS
CNGB1	SCGN	CEACAM1
CNN1	INTS12	ZNF70
CNNM3	COPZ1	COPA
CNNM4	EPRS	WNT4
CNOT10	CUL3	DEDD2
CNPY1	HPRT1	SETD1A
CNPY4	PTPN3	FAM177A1
CNTNAP2	DMXL1	ZNF229
COA4	CNBP	SKIV2L
COBL	HTR4	CDR2
COG2	SEMA7A	WIPI1
COL12A1	ZAP70	GOSR1
COL15A1	CPNE3	P4HB
COL1A1	TFR2	ZNF462
COL1A2	RAB1A	GAK
COL22A1	PPP1R12A	TRIM24
COL4A1	MAGEA10	CEP104
COL4A2	SLMO2	JADE2
COL6A6	PGRMC2	PPRC1
COPE	NAP1L2	HERC6
COPRS	ASF1A	DCUN1D5
COQ10A	SERPINB13	PPP1R15A
COX18	PLEKHA4	KPNB1
CP	SELT	PSMC4
CPT2	CALCOCO2	TOX4
CPXM1	ARFGEF2	COTL1
CREBBP	SUCLA2	METTL7A
CRHR1	SUCLG2	PCMT1
CRIP3	RBBP4	SAR1A
CRLF1	UBL3	CHST11
CROCC	RPL6	BAP1
CROCCP2	UBR7	GOLGA2
CROT	OR10H1	VPS53
CSF1	SSR1	PDX1
CSF2	APBA2	ELP2
CSF3	PPP2CB	SLC30A7
CSTB	RFC3	TMEM131L
CTBP1-AS2	NPTN	SLC10A7
CTGF	VDAC1	DNAJC3
CTHRC1	CRY1	CEP95
CTNNBIP1	ERN2	IFT20
CTPS2	RND2	SLC39A7
CTSC	PGRMC1	SLC4A8
CTSF	PEX11B	ZFAND2A
CTSLP2	CAT	DPAGT1
CTSV	TTC37	FGFR1OP
CTSZ	NT5M	CALCOCO1
CUL4A	DHRS7B	ALDH1L2
CWF19L2	BCL2L13	SRRT
CXCL1	PRKACA	TIMM44
CXCL2	SARS	IRGQ
CXCL3	SAR1A	ZNF331
CXCL8	UCHL1	PITHD1
CXorf40A	RSL24D1	DESI1
CXorf40B	ANP32E	ZNF37A
CYB561D2	SRPR	SNN
CYB5R2	SBF1	NAA35
CYB5RL	SEH1L	HM13
CYP24A1	TMED2	MAFA
CYP26B1	ARGLU1	KLHDC10
CYP2R1	KLHL28	ZNF622
CYP39A1	SMC3	TOMM5
CYP46A1	CX3CL1	EBLN3P
CYSRT1	MARS /// MIR6758	GJD2
DAAM1	PSMB5	GCC1
DALRD3	FANCC	TCAF1
DBNL	SH2B2	LLGL2
DBP	NUDT7	TRIM27
DCAF17	ZNF343	ZNF791
DCAF4	DVL1	SAR1B
DCAKD	ZNF22	FXR2
DCLK3	IGF2BP2	ZSCAN12P1
DCST1	ARFGAP3	SBDSP1
DCXR	SRPRB	ALG5
DDR1	MAP2K4	MEN1
DDX20	C11orf58	PLEKHG3
DDX42	SSTR3	NDRG1
DDX51	MON2	RECQL4
DEAF1	PRKRA	UBIAD1
DEFB109P1	PLEKHF1	DNTTIP1
DEFB4A	FGF17	ARL1
DEPDC7	IL3RA	RASSF5
DHRS4-AS1	ERH	ATF4
DIAPH2	ENPP4	ZNF131
DICER1-AS1	SLC35G2	DNAJB11
DIMT1	GRIN1	LARP1B
DIS3L	DCK	ACVR1B
DISP1	KIFC1	PNPLA2
DIXDC1	CCT4	HSP90B2P
DKC1	LOC101928278	DDX21
DKFZp779M0652	ARPC1A	ATP6V0E1
DLEU1	ZNF473	NOCT
DLGAP1-AS1	DHX15	DCAF13
DMGDH	WFDC2	GPD1
DMKN	PSMA1	AFTPH
DMRTA1	RNF113A	TUSC2
DNAAF2	TAF2	ARIH2
DNMT3B	RPS2 /// SNORA64	ETV5
DOCK4	LARP1	SLC37A3
DOPEY2	EPX	CUEDC1
DPH5	RPL4 /// SNORD16 /// SNORD18A /// SNORD18B /// SNORD18C	IKBIP
DPY19L2	PDCD10	SMYD5
DPY19L2P1	PFKM	MOGS
DPY19L3	MRPL22	RPS6KC1
DSEL	CHUK	FARSB
DSTYK	ALMS1	ELMO1
DTX2P1-UPK3BP1-PMS2P11	RPL10A	RIN2
DUSP10	GORASP2	NADK2
DYNC2LI1	SHOC2	SART1
DYX1C1	PCBP4	FNTA
EARS2	E2F1	SLC7A6
EBI3	LILRA4	WDR45B
EBPL	ACP1	ABLIM1
ECEL1	NEBL	PYCR1
ECHDC1	BAG2	RBM28
ECI2	PNMA2	CBX4
EDA2R	LOC732360 /// TDG	PYGB
EDN2	MPC2	ROCK1P1
EDRF1	PEF1	FICD
EFCAB7	RPS6KC1	SBDS
EFEMP1	RECQL4	IL20RA
EHHADH	RRAGA	ZNF165
EIF2AK4	RALGAPA1 /// RALGAPA1P	CCNK
EIF4A2	RNU86 /// RPL3 /// SNORD83B	PPIE
EIF4EBP3	RWDD2A	MBD1
EIF4G3	SERP1	SLC2A4RG
ELK4	SCP2	C6orf62
ELMSAN1	SRP54	PLVAP
EMC3	AZIN1	HYAL2
EMC7	VLDLR	MAATS1
EMP1	CLTCL1	USP48
EMP3	ARVCF	SEC22A
ENC1	ZDHHC4	ARL2BP
ENDOD1	RHOA	OLFM2
ENO3	AMZ2	ETV1
ENPP5	TEX2	EBPL
ENTPD2	DNASE2	STX18
EPAS1	CENPC	CCDC9
EPB41L1	CPE	ASCC2
EPB41L4A	CCDC15	AP3D1
EPDR1	TFB2M	DUSP12
EPHX2	PHB	CNP
EPOR	FAM208B	RAB18
EPS8L3	RAD54L	ESCO1
ERAP1	PRDX3	ATG4A
ERI2	TMEM14B	TTC17
ERO1A	PRPSAP2	SEC61A1
ESYT1	RAB6A /// WTH3DI	CAMLG
ETV3	EAPP	MAF1
EXD2	ERGIC2	STK40
EXOC3L4	RBM7	TRMT6
EXOSC8	RBM39	HLA-E
EYA2	KATNB1	YPEL4
EZH1	SNX24	PRKAR2A
F12	RHEB	SAE1
F2R	PYY2	ZNF222
FAAH	TNFRSF13B	SEC23IP
FAM104B	PSMC3	AEN
FAM110B	KIR3DS1	ZNF587
FAM110C	TVP23B	ATP2A3
FAM117B	CUL5	RNF40
FAM120B	ADSS	ELOVL5
FAM122C	ZNF646	DCUN1D3
FAM133CP	SDHB	L3MBTL2
FAM136A	HAUS2	ATXN7L3
FAM156A	CYP2C8	LSAMP
FAM168A	LOC101928747 /// RBMX /// SNORD61	CEP76
FAM172A	CYC1	COG1
FAM182B	TNNI2	ZXDC
FAM198B	GJC2	PLCG1
FAM19A4	OSTM1	EDC3
FAM217B	TBPL1	UBTF
FAM220A	DCAF15	ANKRD42
FAM24B	CRYBB3	RELA
FAM35A	ENOPH1	FAM160A2
FAM53B	PSMB7	TFG
FAM66A	CLNS1A	SHMT2
FAM86B1	NUP205	LOC107105282
FAM86DP	SIGLEC7	MEIS1
FAM95B1	FBL	H3F3AP4
FARP2	MFF	KRT10
FBLN1	PRKAG1	SCML1
FCAMR	SUN1	FBXO25
FCER2	PCNP	VWA1
FCMR	POU5F1 /// POU5F1B /// POU5F1P3 /// POU5F1P4	WDR24
FDXR	MUSK	ACBD3
FERMT3	C5orf66	ARHGEF3
FEZ1	HCRP1	ACLY
FGF11	DNAAF1	RHOQ
FGF2	CMKLR1	TBC1D24
FGF9	HNRNPH3	QRICH1
FGR	MAPRE3	UBA5
FHOD1	CNIH1	MMRN1
FHOD3	WIPF1	CWC25
FIBIN	HMGCR	ZNF526
FKBP10	MPP6	CXXC5
FKBP7	FKBP10	UBR7
FKBP9	CCNG1	POLR3A
FKBP9P1	LETMD1	TRMT1
FLJ16779	EMC7	YY1
FLNC	CALU	RAB5A
FLT3LG	AIPL1	TGDS
FMO1	RNGTT	ZNRD2
FMO3	PPP3CC	CD82
FNDC3B	RPL7A /// SNORD24 /// SNORD36A /// SNORD36B	BMP5
FOLR1	PCDH1	POLR2C
FOXJ2	DHRS7	ANP32A
FOXO1	CKLF	LINC00261
FREM1	SCG5	CNOT10
FRMD3	TMEM135	DPH7
FRZB	FAM106A	SLC30A5
FSCN1	ZZZ3	ACP1
FUCA2	IRF7	INPP5K
FUK	NDUFB8	FAM156B
FUNDC1	CREG1	NOC4L
FUOM	SLC25A11	MAGOH
FUT1	PRIM1	MTOR
FZD1	NME1	EIF2AK3
G0S2	PGD	ZNF384
G6PC2	LTN1	ELMSAN1
G6PD	PPP2CA	ZNF805
GABRE	ME2	STT3A
GADD45A	MTPAP	SMAD7
GALNS	CYP21A1P /// CYP21A2	GRPEL2
GALNT12	GNAS	WDR74
GALNT4	COPA	SEL1L
GAMT	TAS2R9	ESRP1
GAPDH	RPL7	DCAF10
GAS1	OAT	CHD1
GATAD1	MTMR6	LRRC47
GATC	LIPT1	MACO1
GBAS	LENEP	SLC16A2
GBE1	MTO1	TMF1
GCLM	STARD13	ZNF664
GDF6	SLC22A2	GPAT3
GEMIN5	GATC /// SRSF9	TOPBP1
GEMIN6	WDYHV1	SNHG8
GEMIN8	SNX4	TMED2
GGCT	GFER	SNIP1
GK	TMED7 /// TMED7-TICAM2	DPM1
GK3P	PRKAR1AP /// PRKAR1AP	WSB2
GLIPR1	WNK1	CASR
GLRX	ADIPOR2	ERCC5
GLS2	CASZ1	PIAS3
GM2A	RPL12	NANS
GMPPB	BMP10	AKT1S1
GNGT2	BEX1	TAF1D
GNRH1	MEAF6	COA7
GOLGA6L9	MDH2	DIABLO
GOLGA8CP	WISP2	AMPH
GOLGA8G	NEFM	TLE3
GP6	STMN2	MGST2
GPC3	FLJ11710	CCDC113
GPN1	GNL3 /// SNORD19B	RNASEH1
GPR155	RABGGTB /// SNORD45A /// SNORD45B /// SNORD45C	IPO4
GPR37	DCTN3	MIGA1
GPR84	GATA1	THBS1
GRAMD3	SEC14L4	ATG3
GRAMD4	CD164	ARFGAP1
GREM1	CTBP2	PSMD5
GRID1	PLXNA1	GBF1
GRIK1-AS2	ALDH4A1	C22orf42
GRIP2	RPL30	FBXO33
GRK6	CLCN3	NUS1
GSTA4	SLC30A1	SLC35B1
GSTM2	TMEM165	MKNK2
GSTO2	CRYGC	KLHDC2
GTF2E2	ZIC1	APBB3
GTF2H5	CD248	NSUN2
GTF2IRD2	CAPRIN1	RABGEF1
GTF3A	SKIV2L2	ERICH5
GTF3C3	MTX2	RAB31
GUF1	RNF13	SBF1
HABP4	RAPGEF3	ZNF827
HAS2	RIOK2	GM2A
HAS2-AS1	SEC23IP	ID4
HAS3	PSMD5	PES1
HAUS1	PAFAH1B1	PPIL6
HAUS4	KIFAP3	MAGT1
HCK	ABCE1	LOC642366
HDDC2	IDH3A	PARP2
HEATR6	YTHDF3	PKM
HECTD1	LMBR1L	REEP4
HEMK1	UNC93B1	EIF1
HEPH	EXD3	NUP58
HEXB	RAB14	FBXO8
HGSNAT	AGPAT5	RINT1
HHAT	CTR9	SEC22B2P
HIBADH	KCNA10	SEC22B3P
HIBCH	BTK	PLPP5
HIF1A	EEF1B2 /// SNORA41	PELO
HILPDA	GLI1	EDA2R
HIST1H2AC	SH3TC2	C1QL1
HIST1H2BC	GLO1	PLEKHA6
HIST2H2AA4	C12orf5	GOLGA1
HIST2H2AC	POLE3	GPN2
HIST2H3A	PARP2	CFAP44
HIST2H4B	C16orf80	SMIM14
HK2	AP5M1	PLK2
HKR1	ARHGEF1 /// LOC100505585	TRERF1
HLA-DQB1	CYP2B6 /// CYP2B7P	PUS1
HLA-DRA	SLC45A2	DPYSL3
HLA-DRB5	TOM1L1	NAV1
HLA-J	AK6	CCDC174
HMCN1	PNMA3	COPS3
HMGB2	DHX35	ISCU
HMGN3	ENTPD3	BCL2L1
HNRNPC	RNF138	ALG2
HPD	ACAD8	CARS
HSD11B1	ACADM	MIA3
HSP90B1	ZBTB7A	LAMA5
HTR3A	COPS5	EIF1AD
HUNK	SERINC1	CDKN1C
ICAM1	RAB6A /// RAB6C /// WTH3DI	COX7A2L
ICAM4	PRDM2	IMPAD1
ID1	SGPL1	PDIA4
IDH1	MANF	RNMT
IDO2	CLIP2	BOD1
IER3	TAPT1	URB1
IFNAR2	PSMD10	NEO1
IFNGR1	PAX9	LOC100419583
IFT172	KCNJ9	CDC23
IFT46	OSBPL8	NSMF
IFT74	TRMT11	RNF41
IGFBP3	LGR4	USP14
IGFLR1	UBA5	TNFRSF21
IKBKAP	PSMD8	ZNF275
IKBKE	KCTD3	TBC1D23
IL12RB1	PNOC	TMEM19
IL15RA	C1QTNF1	GFPT1
IL17C	MRPS22	TBL2
IL17D	AMD1	RIOK2
IL17RA	ZNF408	TMEM208
IL18R1	MAGEB2	ELP5
IL1A	ARPP19	H2AFY
IL1B	HSPA14	SEMA4B
IL1RN	ZNF587	TSR1
IL23A	FUT3	SAMD11
IL24	JUND	LPCAT3
IL27RA	MLLT4-AS1	IER3IP1
IL36G	ATP6V1B2	MBD4
IL36RN	SLC25A32	TMEM150C
IL3RA	AK4 /// LOC100507855	BORA
IL4I1	ALOX15B	PRKAR2B
IL5RA	FBXO11	PLEKHA3
IL6	IMPA1	CHAC1
IL7	PTEN /// PTENP1	ZNF202
INHBA	PPP1R13L	DYNLL2
INSL3	TGFB1	DLL4
INTS3	ACSF2	GLRX5
INTS6	MIR636 /// SRSF2	EMD
INTS9	DYNC1I1	LINC00888
IP6K2	CDH8	YKT6
IPO5	FBXW12	UPF2
IPP	SIX1	CEP68
IQCC	CST4	PALM2-AKAP2
IRAK2	GMFB	SLC25A44
IRAK3	GIN1	YIPF5
IRF5	TNFSF14	MAGEH1
ISCA2	HMG20A	SIX2
ISLR	MINPP1	SEC22B
ITFG1	COL2A1	CTDP1
ITGA7	REXO2	INO80
ITPRIPL2	LCK	MZT1
ITSN2	CADM3-AS1	YARS
IZUMO4	HERC2 /// HERC2P10 /// LOC101929047 /// LOC101929832	LTV1
JAK3	STAT5A	BRPF3
KANSL1	GLT8D1	DERL2
KAT2A	PDHX	TAX1BP1
KCNAB1	CNGB1	RSL24D1
KCND1	NOL11	TMEM173
KCNG2	SOGA1	PREB
KCTD10	RAB28	PSMD8
KDELC1	MAN1A1	PHKG2
KDM1B	AC003989.4	EIF3G
KEAP1	KIAA1614	EXD2
KHK	TSNAXIP1	ARPIN-AP3S2
KIAA0101	MAK16	LRIF1
KIAA0319L	CCL7	TBC1D10B
KIAA0753	BCLAF1	DHRS2
KIAA1549L	S100A1	PNRC1
KIAA1804	PVRL2	SLCO3A1
KIFC2	TRIM62	TFB2M
KIT	LPP	ZNF639
KITLG	TUBB	BCKDHA
KLF12	MED6	LIG1
KLHL12	HYAL3	OSBP
KMT5C	PTGER1	RBM8A
KRT79	ZBTB1	ECE1
KYNU	BST2	NKIRAS2
L3MBTL1	MAPRE2	BUD31
LACTB2	KCNJ13	RASD1
LAMB1	CBX8	MRPL3
LAMB3	DDX1	SEC24A
LARS	PSMD7	RBM39
LBH	BMPR1A	ING1
LDB3	CHMP1A	SLC25A32
LDLR	OXA1L	CNOT2
LEAP2	TSN	CADM1
LGALSL	CEP63	ZCCHC17
LHX5	PANK3	LRRC20
LIAS	ADAM15	BMPR2
LIF	DYNC1LI1	ARHGAP24
LILRA5	GPX7	FAM98A
LIMCH1	FASTKD2	CHCHD7
LINC00176	MPC1	PRPF19
LINC00339	PRKRIR	RER1
LINC00473	NDE1	LAMTOR3
LINC00602	ZFR	YWHAH
LINC00930	ARAP3	SLC44A3
LINC01106	HSP90B1 /// MIR3652	SF1
LIPA	CLP1	SIX3-AS1
LIPG	MYH13	COPG1
LMTK3	UFM1	TM9SF2
LMX1A	EHD2	RNF145
LOC100289673	LARP4	MCFD2
LOC730101	LILRA3	SSR3
LOC81691	C6orf211	DNAJB9
LOH12CR2	ARID1A	C9orf72
LRFN4	ZDHHC6	DYNC1LI2
LRPPRC	PTCD3	BBS9
LRRC20	SIM2	STAM
LRRC27	CHIA	PLCH1
LRRC32	GCSH /// LOC101060817	THOC3
LRRC8D	MAP7	SORBS2
LRRN1	TCF7	IFIT1
LSG1	BDKRB2	CLUH
LTBP1	SLC12A7	PIKFYVE
LTBP2	HNF4A	GLUL
LYN	MED17	WDPCP
LYRM1	ZSWIM1	ATP6V0A2
MACROD2	EIF2B1	DCAF1
MAFF	UBE2G1	TRIM4
MAGEE1	RDX	RAP1GAP2
MAN1A1	ABCB1 /// ABCB4	EFHD2
MANBA	OGT	UBE2M
MAOA	IRF5	FAM227A
MAP2K3	SREK1	GDAP2
MAP2K6	CD52	ARL4A
MAP3K8	RAB2A	COX19
MARCO	TMEM9B	ZNF618
MAST4	CYTH3	CLCN6
MATN2	PREPL	HIBADH
MBIP	ADNP	CYP2R1
MCAM	TRANK1	SRRD
MCEE	DAD1	SNX5
MCM6	SCFD1	SYAP1
MDH2	CYP3A5	DDA1
MED18	COG5	EPSTI1
MEF2C	RWDD1	ALDH6A1
METTL5	PPT1	NDST1
METTL7A	EFR3B	ZNF667
METTL9	UFC1	THAP9-AS1
MFGE8	TSPYL1	ARL14EP
MFSD2A	CCSER2	SUPT6H
MGARP	POLR2B	CHDH
MGC12916	PLEKHA6	SDE2
MGME1	KCNJ10	MED8
MGP	SUGP1	SMG5
MICB	NRBF2	TIMM10B
MIF4GD	PANK4	RTRAF
MIOS	VAMP7	SDAD1
MIR146A	LECT1	SPATA2
MIR22HG	CD46	ESS2
MKS1	LAT	ABHD5
MLNR	RPLP0	UAP1
MMP1	ANP32D	PITPNM2
MN1	ALDH9A1	SLC30A4
MPL	PIP4K2C	ISCA1
MPLKIP	OR10H3	GOLGB1
MPP7	SS18L1	NOTCH3
MRGPRX3	CMAS	XPOT
MROH6	CCZ1B	MAP3K6
MRPL14	DNAAF2	MTA3
MRPL19	NOD1	CCSAP
MRPL24	MRPL17	ARHGAP39
MRPL30	TXNL1	PRPF18
MRPS27	PCBP2	TMEM243
MRPS9	DDX5 /// MIR3064 /// MIR5047	ABCC8
MSC	CABP2	IFIT5
MSC-AS1	MUC2	TMEM198
MST1R	MIR1236 /// NELFE	HNF4A
MSTN	MARCH8	DDX18
MSX2	CLCNKA /// CLCNKB	COL6A1
MTAP	NEK7	N6AMT1
MTERF2	ATF1	MRS2
MTERF3	TMEM140	BHLHE40
MTFR1L	RPS3A /// SNORD73A	SYNPO
MTG2	SEC24B	C19orf47
MTIF3	CHRNE	WDR43
MTPAP	CCL25	SEPTIN8
MUL1	KLHL9	SEPHS2
MUSTN1	PIGP	GATAD2A
MXRA8	MYH8	B4GALNT3
MYO1B	MED24	WDR19
MYO1D	DERL2	BHMT2
MYOZ1	COA1	DNAH5
N6AMT1	CHGB	C15orf48
NAAA	CIC	CNTRL
NAB1	SPI1	CLPP
NAMPT	COPS6	ISOC2
NAPSA	CYAT1	HDAC1
NARS	RTCB	RAB39B
NBEAL2	SLC35E1	ANKRD11
NBPF1	SNX2	SYK
NBPF10	COX7A2	TP53
NBPF11	MRPL13	LOC100630923
NBPF14	HSP90AB1	LYSMD3
NBPF15	CREB3L2	GET4
NBPF3	KPNA3	INKA2
NCAM1	COPS2	POLR1B
NCF1	HSPA2	SELENOW
NCF1B	CMAHP	MRPL2
NCF1C	GIT1	PSMD12
NCKAP5	CPTP	PIP4P1
NCOA6	TMPRSS5	ZW10
NCSTN	MAP4K3	DYM
NDST1	NR3C1	HCCS
NDUFV2	SUPT4H1	RAB36
NEK3	LZTFL1	RANBP10
NFATC3	NBPF1	SRP68
NFIA	ATP8B1	AOX1
NFKB1	PYROXD1	FOXO4
NFKB2	COPB2	GPANK1
NFKBIA	ACTL8	EIF3B
NFKBIZ	GPR124	EIF4H
NGF	RBM12B-AS1	SYS1
NID1	CNN1	TSC22D1
NIPSNAP1	SERHL /// SERHL2	ERG
NLN	ANP32A	SUCO
NMNAT1	ARFGAP1	UPRT
NMT2	C22orf31	KIAA1211L
NMUR2	BLCAP	SORD
NOA1	CD4	FOXK2
NOCT	PLEKHG3	AP5Z1
NOD2	HSPA12A	CXorf40A
NOSTRIN	MYO7A	USP37
NOV	PPBPP2	PACRGL
NPC2	CCDC87	SMAP1
NPHP1	MAN1A2	CCZ1B
NPM3	SMO	LTN1
NPTXR	ST3GAL4	SPTY2D1
NQO1	ZNF706	DNAJC10
NR1H3	UBE2A	CDK13
NRBP2	PCBP1	RARS2
NREP	RANBP2	MDH1
NRF1	PDE9A	NECAP1
NRG1	SPRED2	MED26
NRG3	CDC37L1	ZNF770
NRN1	MOG	SDF2L1
NSMCE1	SIPA1	EPB41L4A-AS1
NSUN6	NDUFS3	DNAAF5
NTAN1	INCENP	SLC35F6
NTM	CDA	UBE2J1
NTN5	GPR21	PDE9A
NUDT16P1	HNRNPH2 /// RPL36A-HNRNPH2	TYW3
NUDT5	CDK4	SULF2
NXN	EIF4E	COA8
OARD1	EGOT	TRMT61A
ODC1	ARPC5	MLEC
ODF3B	RPL23A /// SNORD42A	BRPF1
OGFRL1	HIST1H3E	ABI3
OGT	API5	NELFE
OLA1	WAC	PPAN-P2RY11
OLFM4	EIF1B	EXOSC1
OPA3	LOC729966 /// PDE4C	AP1M1
OPCML	PAPSS1	ARPIN
OR2A1	PLEKHF2	APBA3
OR51E2	UBE2Q1	PRSS23
OSBP	SEC13	DDX46
OSBPL1A	CAND1	REXO4
OSGEP	ZCWPW1	PRICKLE2
OSGEPL1	MRPL49	DNAJC9
OSM	ATP11A	ZNF547
P2RY13	CROCCP3	GCK
PABPC1L	NCBP2	DERL3
PADI2	SLC25A3	UTP25
PAK7	CRH	RRN3
PALB2	SOX2	HDLBP
PANK1	SLC30A9	GLT8D2
PAPD5	HLTF	BAHCC1
PAPPA	KCNQ1DN	SPATA17
PAPSS1	HIRA	CERS2
PATZ1	UCHL5	PRKAB2
PAXIP1-AS1	ZNF696	CRELD2
PCBD1	CITED2	CHERP
PCDH15	PTDSS1	ERLEC1
PCDH18	PVALB	LLGL1
PCGF6	SH3BP2	BLCAP
PCMTD1	TDP2	PTPRJ
PCYOX1L	KRT33B	LIN52
PDCD4	ELL2P3 /// ELL2P3	MIEF1
PDCL	MAFB	SPTBN2
PDCL3P4	SPC24	TVP23C-CDRT4
PDE4B	SRP9	DHX57
PDE9A	NTSR2	F2RL3
PDGFRL	PVRIG	HS6ST1
PDZD11	APOC1	TOMM40
PEBP1	PAWR	MCPH1
PELI1	ANKRD49	MSTO2P
PEX1	PML	FUT8
PF4V1	EIF4H	ABCB8
PFDN1	RFX5	RBM47
PGAM4	CCDC9	LOC652276
PGAP3	TCEB3	FAF2
PGK1	GDI2	MAPK8
PGLYRP2	ELOVL5	WRN
PGM2	KIAA1654	PRELID1
PHF8	KRT8P11 /// KRT8P11	CYGB
PHLDB1	IGKC /// IGKV1-5 /// IGKV1-5 /// IGL@	ARV1
PHYH	GPATCH2	EPRS
PID1	CCR5	MYRIP
PIM2	ACAT1	MIS12
PITPNA-AS1	CTF1	ODR4
PITPNC1	ALG9	RAB3B
PITPNM3	BTBD3	MEST
PKM	PEG10	TTLL11
PLA2G12A	OCM2	TPRG1L
PLAT	TRADD	TMEM64
PLAUR	LOC339166 /// WSCD1	RMDN3
PLCG1	MC1R	NR4A3
PLD2	RPS3	COG5
PLD6	TOR1AIP1	NCAPH2
PLEK2	CD177	PLXND1
PLEKHM3	HSPB6	HCFC1
PLPP3	LANCL1	HIC1
PLSCR1	LRP1	EIF5
PML	ORC3	C1orf52
POFUT1	DLK1	CXXC1
POLA2	KCNH4	OSER1
POLH	SGMS1	NVL
POLR1B	C6orf48	ZC3HAV1
POLR1D	PCNXL2	NLE1
POLR3GL	KRT20	AGO3
POMGNT2	RAD21	PPAT
POMT1	ALG11 /// UTP14C	MRPL49
POU2F2	MRPL39	KDR
PPFIBP2	IDH3B	ZNF529
PPIP5K2	LOC101928625 /// MED21	CENPBD1P1
PPM1H	PRRC2A	GPATCH1
PPP1R12B	AGRN	GIPC1
PPP1R32	TOB1	CCDC59
PPP2R1B	CXCR3	YIPF2
PPP2R2D	DUX1 /// DUX3 /// DUX5	SPSB3
PPP2R5C	MEST	ALDOC
PRELP	FNBP4	EBNA1BP2
PRIM1	C12orf29	ARL4C
PRKAA2	SYDE1	PCDH7
PRKAB2	MIER2	XYLT2
PRKAG1	PSMC2	C11orf95
PRKCH	G3BP1	NDUFS1
PRMT3	POLR1B	ACVRL1
PROS1	TSPAN7	DBNDD1
PRSS35	MRPS30	CRLS1
PRSS50	EDC4	COG3
PSD3	PADI3	TMEM26
PSMA5	CPLX3	ATG2A
PSMA7	LSM14A	TEX261
PSMC4	RNF130	PAFAH1B3
PSME3	FAM208A	PRMT5
PSMG1	JOSD1	GNG2
PSTPIP2	NIF3L1	KLHDC8A
PTAFR	GZMM	TM7SF3
PTGES	ATP5G3	ZNF542P
PTGS2	SET /// SETSIP	THUMPD1
PTK2B	STAG1	UBA6-AS1
PTPN18	CKAP2 /// IGLC1 /// IGLV1-40 /// IGLV1-40 /// IGLV1-50 /// IGLV1-50	ORC3
PTPN6	URI1	KLF15
PTPRO	NUDT9	RXRA
PXDN	TMEM212	ABCF1
R3HDM4	SLC8A1	CTU2
RAB11FIP2	ACAP2	PRPF6
RAB20	RUNX3	EVI5
RAB24	GLB1 /// TMPPE	PARP9
RABGGTB	PMF1	MGAT1
RABL2A	NPVF	PMS1
RABL2B	FYB	LMLN
RAC2	GPD2	PLAG1
RALGAPB	C2orf47	ZNF570
RALGPS1	NPEPL1	ZSCAN2
RAMP2	LOC729164	RABL2B
RAP1GDS1	PSMB3	PTMS
RAPGEF3	PPP1R2P9	NREP
RARRES1	PLP2	GTPBP2
RASD1	PRKCH	MRPL55
RBAK	CLUHP3	PITPNC1
RBM12B	SSR3	RAB6A
RBM33	FAM13B	PRELID3B
RCE1	NGB	SAMD1
RDH10	DDR1-AS1	OXCT1
RELB	KLF11	GAR1
RELT	SLC2A14 /// SLC2A3	PITPNM1
RGS5	IRF4	NUDT21
RHBDF2	NR4A3	CTSO
RHCG	EFS	DCUN1D2
RHOA	LRBA	NKX2-2
RHOQ	GSTA4	ACO2
RIMBP3B	MASP1	FAN1
RINL	NUP93	TMEM37
RIPK2	KIF5C	ANKS3
RIT1	NRGN	IBA57
RNASEH2B	ANGPT1	TMEM184A
RNF149	IFNB1	REXO2
RNF168	SLC16A8	PITPNA
RNF170	SCML1	ZNF473
RNF19B	CKS1B	RTL6
RNF24	ID4	DRG1
RNFT1	IDE	ATAD3B
RNPEP	HOXC8	SASS6
RORC	GTF2H3	LRRC32
RP9	C1QBP	TAF5
RP9P	AK6 /// TAF9	MARVELD3
RPL17	CST3	LDLRAD4
RPL23AP53	PREB	TBC1D10A
RPL34	SPATA5L1	GON4L
RPL5	MTR	MTPAP
RPP30	SC5D	FUCA2
RPP40	ALDH1L1	KLC4
RPS3A	TMPRSS3	ZNF3
RPS7	KIAA1279	MKRN2
RPSAP58	MAZ	MIB2
RTCA	MUC3A /// MUC3B	PSMD3
RUNDC3B	ANKMY2	GRASP
RUNX1	STAM	GPR4
RUNX3	POLQ	TXNL4B
RWDD4	AIFM1	NAA15
S100A9	TNFRSF1B	COPS2
S1PR1	MTUS2	TMEM167B
SAA1	ZBED5	TSPAN13
SAA2	PPFIA2	ZFAND1
SAA3P	PCNA	PCYT1A
SAA4	NBEAL1 /// RPL12	DSN1
SAC3D1	COPS7A	CYP27A1
SAMD13	DDX51	VSTM2L
SARM1	CCR3	TRAPPC10
SATB2	SMNDC1	TSPAN9
SBNO2	STARD5	ARSD
SCARF2	COIL	NKAP
SCD5	KCNAB3	GOLPH3
SCFD2	KPNA6	ELP1
SCGB1D2	LBP	GOLT1B
SCO1	CALM1 /// CALM2 /// CALM3	TMEM132D
SCRT1	CNOT8	BUB3
SEC24A	PSMD14	PRKAB1
SELK	CARD14	MPV17L
SEMA4B	MAPK8IP3	EIF3F
SEMA4F	KRT2	MTHFD1L
SEMA6C	ENDOD1	SMAD9
SEMG1	TSR1	SEMA3F
SEPP1	UBA2	NUBP2
SERAC1	ARPIN	AKTIP
SERPINB7	KIZ	NIPA2
SERTAD1	ZNF287	SNHG16
SETD3	GABRR2	EEF1AKMT4
SFR1	FLJ42627	MIR22HG
SFRP5	WT1-AS	FLT1
SFXN3	MYH3	WNK2
SGCZ	LINC00563	LINC02593
SGK2	CNPY4	DDX51
SGMS1	MEGF6	CDC37L1
SGPP2	SLC24A2	GPX2
SH3BGR	SEPT10	NOP58
SH3PXD2B	C8orf33	KRBOX4
SHC1	WFDC1	ZMYM3
SHISA5	ETAA1	C12orf29
SIAE	PDHB	LINC00365
SIDT2	WDR47	JUN
SIGLEC14	ADAM19	KLHL5
SIL1	TMED3	MYT1L
SIRT3	CCNB1IP1	FBXO4
SIRT5	LAIR2	TRMT2A
SKAP2	LAMTOR3	PDE12
SLAMF1	RAB11FIP2	DLG2
SLC11A2	CACNB3	MSRB2
SLC16A2	BRF1	DOCK6
SLC16A3	RP11-10N23.4	GOLPH3L
SLC17A4	CCPG1 /// DYX1C1-CCPG1	DIS3
SLC17A5	PAM	ZNF417
SLC1A3	TOX3	UBA6
SLC20A1	ANKRD10-IT1	FEM1C
SLC22A4	RUSC2	SOCS7
SLC22A5	IGLV4-60 /// IGLV4-60	ZPR1
SLC23A3	OSBPL10	EEPD1
SLC25A15	TERT	EPB41
SLC25A21-AS1	LRRC20	TMEM67
SLC25A27	PDCL3 /// PDCL3P4	PAICS
SLC25A36	DOC2A	UTP11
SLC25A43	MAMLD1	IDH3A
SLC25A51	TMEM59	TIAM1
SLC27A1	EEF1E1	HGS
SLC27A4	RNF139	SS18L1
SLC29A2	HERPUD1	CA4
SLC2A4RG	HLA-DMB	IFT80
SLC2A6	MAGI1	MEX3C
SLC2A8	KCTD17	PDGFA
SLC31A2	RIOK3	PAQR8
SLC34A3	CANX	VARS
SLC38A3	CRTAC1	RNF126
SLC39A10	DPP8	B3GNT8
SLC39A14	TMED5	FLOT2
SLC3A1	PSMG2	RANBP1
SLC40A1	LOC101928378	LCMT1
SLC43A2	SLC25A17	GTF2F2
SLC46A1	RGS12	RAB15
SLC46A2	RPL11	FEN1
SLC4A11	LY6D	PTK7
SLC6A14	GOLGA2P5	ZNF674-AS1
SLC7A11	CHKB-CPT1B /// CPT1B	WDR36
SLC7A5	GOLIM4	GRIA4
SLC7A5P2	GPLD1	SLC2A12
SLC7A9	SLC26A2	YIPF4
SLCO4A1	RAP1GDS1	LRRC1
SLCO4A1-AS1	CYP4F12	EFL1
SLMAP	C14orf1	BOD1L1
SMAD7	C21orf2	SNCB
SMARCA1	PPP2R5C	HHEX
SMC3	NRCAM	CYB561D2
SMIM19	SKAP1	GNA11
SMIM3	ANXA13	PTRH2
SMIM8	POGK	MMRN2
SMOC2	FAM8A1	ARHGAP5-AS1
SMYD3	DCSTAMP	DPH3
SMYD5	RHOBTB3	EMSY
SNAPC2	TRAM1	TMUB2
SNAPC5	MYL1	IRF2BPL
SNCAIP	FAM96B	TRMT112
SNHG1	CHRNA2	RIOK1
SNHG8	ADARB1	MORF4L2
SNORD76	SEC61A1	PRR15L
SNPH	MRPL19	TXNDC12
SNUPN	DNAI1	PIP4K2B
SNX17	VPS26A	TMEM14A
SNX5	SHC1P1 /// SHC1P1	KMT5C
SOAT2	TMEM126B	TRUB2
SOCS1	MFAP3	GOLIM4
SOCS3	NR2F1 /// NR2F2	LAMP3
SOD2	ADAM29 /// LOC101928551	SNHG20
SORBS3	VPS4B	HIP1R
SOX13	PAXBP1	GAD2
SOX8	IFT52	PLEKHG2
SP6	APOBEC3C	HSPA14
SPAG8	MAP1LC3B	ZNF347
SPARC	POLDIP3 /// RRP7B	CLEC1A
SPATA32	PAX2	MIR210HG
SPEF2	LAMA4	CADPS2
SPIN2A	ERC2-IT1	TSSC4
SPIN2B	GCC2	MXRA7
SPOCD1	TPD52	CALR
SPOCK1	RPS15A	TAGLN3
SPRR1B	KHDRBS2	LRIG3
SPRY4	SEPT5-GP1BB	INPP5E
SQRDL	PPP6R1	KDM7A-DT
SRA1	LRRC61	YME1L1
SRD5A1P1	TPRKB	PRKCD
SRGAP3	IGKV1-37 /// IGKV1-37 /// IGKV1D-37 /// IGKV1D-37	DDIT3
SRSF6	DHX34	SUPT5H
SRSF8	RALGAPA1	SLC33A1
SS18L1	KIAA1751	COPB1
ST3GAL1	GFPT1	RNPS1
ST3GAL4	CXCR5	CEP57
ST5	FHL3	CDKN2AIP
ST8SIA2	SMG8	LAMB1
STAT3	CRX	CXCR4
STC1	ETFA	WASF1
STC2	ERICH1	MINDY2
STEAP1B	TAS2R16	RBM27
STIM1	SEMA3F	ERVK3-1
STMN1	CCT7	PTPRH
STOML1	CRNN	KAZN
STOX2	ORMDL2	CMC2
STRADA	PSCA	GPR180
STRBP	ITGA9	ZFP3
STX11	EIF2S2	SLC18B1
STX3	VDAC2	LAMA1
SUDS3	HSF2BP	OSGEPL1
SUGCT	ASAP3	MAOB
SUMO1P1	GAK	VPS33A
SUPT6H	PRMT5	SLC26A2
SVEP1	OSBPL9	DUSP11
SYNDIG1	CRHR2	POLD3
SYNJ2	TSKU	TCF7L2
SYNM	ENTPD2	CABLES1
TACR1	NPY6R	BET1
TAF11	FCF1 /// MAPK1IP1L	NABP2
TAF1D	PGLYRP1	NHP2
TAF5L	CRIP1	DNAJC5
TAGLN	BTNL8	KLF7
TAMM41	GABARAPL3	OTUD5
TANGO2	GPR63	PRELP
TAPBP	YBX1	COPB2
TBC1D4	SSX3	CDKAL1
TBX3	STAG3L3	MRC2
TCAF2	BCAS2	CCNT1
TCEA2	VBP1	PAGR1
TCEAL4	BTAF1	ATP8B2
TCEAL8	LOC101930324 /// NSF	DYRK4
TCHP	IL25	KAT8
TCOF1	ALKBH1	SELENOI
TCP11L1	TARP	MLH1
TDRD3	LOC101929304 /// SNX29	ZNF283
TESC	RAB5A	LEMD2
TEX2	SMPDL3A	SETD7
TFAP4	LOC101060521 /// POLR3E	HSPB6
TFE3	COL9A1	SLC30A6
TFPI2	OR11A1	C16orf46
TGM2	TARS	TMEM229B
THAP12	GPR153	AHDC1
THBS1	CRLF3	NEGR1
THNSL1	GNAI1	TIAL1
THRA	SLC25A36	CREB3L1
THUMPD1	LMAN1L	C16orf91
THUMPD3-AS1	IL36A	TBC1D25
THYN1	HRASLS2	KIAA1549
TIAL1	GPA33	DNAJC2
TIMM10B	TLK1	CFAP36
TIMP2	LPXN	ZER1
TLL2	NUP153	PSMG3
TM4SF18	DDX21	TMEM167A
TM7SF3	MRPL18	ZNF362
TMED1	FRS3	HSPA13
TMEM106C	ARHGAP15 /// LOC101928361	CCP110
TMEM132A	SLC6A20	LDB1
TMEM133	TXNL4A	MTO1
TMEM143	KCNB2	PIH1D1
TMEM145	ALDH1A1	BRSK1
TMEM14A	ARID5A	STAT6
TMEM150A	GCA	MR1
TMEM150C	CSTF3	FHOD3
TMEM165	IGLC1	CBX6
TMEM169	ITFG1	SART3
TMEM192	SNCAIP	WDR46
TMEM223	MAP2K7	MNX1
TMEM230	STRAP	FNBP4
TMEM234	FZD2	NFX1
TMEM25	AP3B1	MMUT
TMEM253	CD38	NUP214
TMEM260	TAOK1	ZCCHC4
TMEM39B	SERPINB10	CDC5L
TMEM41B	RNF6	TRAPPC2B
TMEM42	NOC3L	ZNF470
TMEM43	KIF2A	DDX19A
TMEM72	UBE3B	RNF185
TMEM74	MKL1	CNEP1R1
TMEM88	SERPINF2	UBE4A
TMEM92	PLEKHB2	TRAK2
TMEM98	NDEL1	ERG28
TMPRSS5	CAPN5	RAMAC
TMX1	ITGAE	DDR1
TNF	RPF1	MCMBP
TNFAIP2	CCL16	CCDC186
TNFAIP3	IGHG1 /// LOC100293211	SLC4A1AP
TNFAIP6	GPN3	IARS
TNFAIP8	DPYSL4	HBP1
TNFSF13B	MFAP1	RCN1
TNIP1	SCAMP1	EIF4EBP1
TNIP2	GOLGA4	ADM2
TNIP3	MYCLP1 /// MYCLP1	TIGD7
TNXA	IGK /// IGKC	NBEAL2
TOLLIP-AS1	PRKACB	RLIM
TOM1L1	ADAM28	GLIPR2
TOMM34	CYB5R1	BRI3BP
TP53INP2	ACOT1 /// ACOT2	PCDH1
TP53TG1	RNF167	ZNF10
TP53TG5	DDHD2	MMP24OS
TPI1	CDC5L	ZNF26
TPP1	ADAM8	ERCC8
TPPP3	CLGN	CSNK2B
TRAF3	DNAJA2	RACGAP1
TRAF3IP2	PSG2	COPG2
TRAF5	GMIP	TMEM164
TRAPPC2	CD2	TMEM106C
TREM2	MRPS12	PLCXD3
TRERF1	DIMT1	YAE1
TRIAP1	RTN1	USP8
TRIM45	PRKD3	MTMR6
TRIM65	FMNL1	PEX13
TRIM7	ACRV1	SLC30A9
TSEN2	ALOX12	TRIM68
TSFM	PRKAB1	FBXO42
TSN	PAK7	EEF1E1
TTC17	LYPLA1	ZMYM6
TTC19	QTRTD1	EHBP1L1
TTC32	TERF1	FAM222A-AS1
TTC39B	PDSS1	ZRANB1
TTLL1	GTF2E2	BRAP
TUG1	PYGM	ATL2
TXNRD1	PTK7	SLC25A51
TYRO3	MRPL41	ITCH
UBAP1L	CYP17A1	IK
UBD	LTBP2	GCNT4
UBE2G2	PRX	ADAM17
UBE2N	AGRP	CDK7
UBXN8	PHB2	PTGFRN
UCN	EXO1	GSS
UCP2	BBC3 /// MIR3190 /// MIR3191	SYT4
UGT2A3	USP5	USP16
UGT2B15	ZNF391	RAD9A
UIMC1	WDR44	MON1B
ULK2	CUTC	TEF
ULK3	DPM1	LPCAT1
UMPS	CIB2	OSTC
UNC5CL	TMEM30B	MAF
URB2	EXTL1	PSD4
USF1	ACYP1	TSPYL2
USP28	OSBP	PURB
USP38	SLC25A38	ZNF829
USP43	ADORA1	C1orf109
UTP20	FUCA1	AMPD2
VASH2	EEF2	CLPB
VAT1	TNK2	VAMP4
VAV1	PRKAR1A	ZNF841
VCL	TMEM208	DDX49
VCP	SPIB	HMGB3
VDR	ALX4	SLC52A2
VIM	CNGB3	MTRR
VIPAS39	ABHD11	TMUB1
VPS25	GPR157	PAPOLA
VPS35	CBWD1 /// CBWD2 /// CBWD3 /// CBWD5 /// CBWD6 /// CBWD7 /// LOC101060578	C1orf43
VTCN1	KPTN	QPCTL
VWA5A	FAM49B	PTBP1
WASH5P	C1GALT1C1	MAFG
WASL	DUSP11	ZNF527
WDR25	APOO	INS
WDR3	EEF1G /// MIR3654	UNC5C
WDR31	SLC39A6	LRP5
WDR37	GPX5	FUBP3
WDR6	CPD	GSTK1
WDR70	SNRPN /// SNURF	TXNDC9
WDSUB1	HIGD1A	ZNF75D
WIPF1	TASP1	B2M
WLS	C6orf120	TKT
WNT2B	H6PD	GDI2
WTAP	DBT	VAV3
XKR4	CES1P1	TLE2
XPC	RCHY1	BNIP3L
ZBTB16	CDS2	OIP5-AS1
ZC2HC1A	PRKAA1	TEX30
ZC3H12A	RBM3	CFC1
ZC3H12C	FABP7	PSAT1
ZCCHC7	PTDSS2	BAMBI
ZFAND6	DYRK2	LAPTM5
ZFP2	CDK7	RAVER1
ZFP3	C22orf24	CTSB
ZFP62	CYP2A7	ZMYND19
ZFP90	SNRPB	FBXW8
ZGLP1	GLRX3	KANK1
ZKSCAN1	ADD3-AS1	HMGCLL1
ZKSCAN8	ZBP1	RGP1
ZMAT1	AKAP9	NIFK
ZMPSTE24	MXRA7	UBTD1
ZMYM3	TMEM209	COLCA1
ZNF112	MMP26	GDF11
ZNF135	BARX1	ABAT
ZNF174	SKIV2L	COL4A1
ZNF177	CLINT1	FLT4
ZNF202	SYT12	SLC7A1
ZNF234	SRP19	USP38
ZNF239	PGF	FOXRED1
ZNF248	CHI3L1	RXRG
ZNF25	RGR	TIMM21
ZNF263	GIPC1	CMSS1
ZNF285	PTAFR	SMARCC2
ZNF3	ZNF783	RTCB
ZNF30	C1D	C1orf174
ZNF311	GRAP	SERF1B
ZNF32	RANBP6	STRAP
ZNF345	TWF1	LINC00673
ZNF362	CASD1	SORL1
ZNF404	GRK5	TIGD5
ZNF418	SEC24D	UTP6
ZNF429	TSSK1B	WAC-AS1
ZNF431	IL1RAPL1	MAGI1
ZNF449	GRB10	SATB1
ZNF487	IFNA16	ILVBL
ZNF525	MZT2B	NUAK1
ZNF527	YEATS4	DKC1
ZNF564	MRFAP1L1	FIP1L1
ZNF565	BMP7	UBALD1
ZNF589	PPP1R14D	CDH5
ZNF595	PLXNA3	SAFB2
ZNF606	TYR	SOD1
ZNF623	ZNF286A	FKBP15
ZNF641	SNF8	HOMER1
ZNF662	SLC34A1	TNS1
ZNF70	DDX3X	ASB1
ZNF763	CAAP1	EDARADD
ZNF823	NR1I3	SEC24D
ZNF835	POLR2J /// POLR2J2 /// POLR2J3 /// UPK3BL	URB2
ZNF862	IBTK	CFAP20
ZNF92	TTC33	SETBP1
ZNF93	EPB41L3	LINC00294
ZNRD1ASP	IL1RAPL2	TCP1
ZSCAN20	APLNR	ARFIP2
ZSCAN21	CD70	RING1
ZSCAN32	SNRPD3	TAF4B
ZSWIM8	RTN2	C12orf57
AAED1	KDM6B	ARIH1
AAR2	FZD6	ORC4
ABCA3	ENTPD1	USP1
ABCC8	KLK13	RUNDC1
ABHD10	RIN1	MTDH
ABHD15	KCNA1	LOC643072
ABLIM1	OR10C1	CBWD2
ABT1	PRUNE2	CYP2J2
AC007204.2	ANAPC10	CDC42EP4
AC007383.3	INF2	PPP1R15B
AC019117.2	ZMYND11	MFSD9
AC079630.2	FAF1	IRS2
AC090044.1	MMADHC	PSMD13
AC123768.4	BDKRB1	SF3A2
AC132216.1	SF3A2	MTA2
ACACA	VIM	AKAP8
ACAN	GTF2B	RAB33A
ACE	ELANE	LNX1
ACOT1	KRT5	CD59
ACOT2	EIF4G2	WDR90
ACRBP	PPP2R3C	NBR1
ACTRT3	EPPIN /// EPPIN-WFDC6	POM121
ACVR2A	PHLPP2	SUPT7L
ADAM22	CALHM2	MRGPRE
ADAMTS2	CLCN1	SENP3
ADAP2	DIAPH2	IGFBP4
ADCY2	SIN3B	HGD
ADCY5	COG2	DNAJC7
ADSSL1	RSRC2	SETD1B
AGBL4	LA16c-381G6.1	ZNF674
AIF1	RPS18	SRSF8
AIG1	EDA2R	TRMT44
AK9	CDC25A	SCG2
AKAP5	IGHG1 /// IGHM	PDHX
AKIRIN1	HYAL4	UHRF2
AKT3	ATP2A2	ATP9A
AL121761.2	RCBTB2	KAT2A
AL589765.1	FZR1	PARN
ALDH5A1	GPR52	C18orf25
ALPPL2	CHRNB2	MAML3
ALS2	ZNF574	ZNF12
ALS2CR11	TBK1	ST6GAL1
AMBP	RP3-497J21.1	DBI
AMER2	SPG21	CCPG1
AMER3	HSD17B10	RBM48
AMIGO1	YTHDC2	TSNAX
AMZ2	GMEB2	AURKAIP1
ANKMY2	MAT2B	ARMC6
ANKRD20A1	HIST1H1A	UBXN8
ANKRD20A2	KCNMA1	ZRANB3
ANKRD22	ZNF771	CEP120
ANKRD39	NCOA4	TMEM132C
ANKRD7	ASCC1	KREMEN1
ANXA6	WDR62	TIMM23
ANXA7	PLS1	GOLGA4
AP000688.29	RNF38	NUP35
AP000769.7	EVI5	KCTD20
APCDD1L	AARS	LAPTM4A
APH1B	ERBB2	RDH13
APOB	GNB2L1 /// SNORD95 /// SNORD96A	INHBE
AQP4	ATP6V0B	SLC29A1
AQP7	SACM1L	GCH1
AQPEP	SSBP1	DDB1
AREL1	PRKG1	TMEM50B
ARF5	DIP2A	SMAD4
ARHGAP10	NPHP4	SDHAF1
ARHGAP20	FBXW11	CHCHD4
ARHGAP36	FAM66D	ACAA2
ARHGEF26	BLK	FBRS
ARHGEF6	PPFIBP1	RFC4
ARIH2OS	SYNCRIP	CELSR2
ARL15	UGP2	KLHL15
ARL2BP	SCAMP3	PNMA1
ARL3	OXSR1	CYLD
ARNT2	MICALL2	ZNF44
ARSI	AP1AR	CNST
ARV1	GOLGA7	GLTP
ASAH1	PPIB	DNAJB12
ASB8	ZNF611	EPAS1
ASH1L-AS1	UFL1	MAP1LC3B2
ASL	ANXA2 /// NHP2L1	AP3M2
ASNSD1	ATP2B2	ATP5MC3
ASTE1	WRB	PXDN
ATG9B	HINT1	EIF2B2
ATP1A3	BCAS1	MMP24
ATP2A3	CHD3	ZNF274
ATP6AP2	ART4	LRFN2
ATP6V0B	EIF3A	VIRMA
ATP6V0C	COPS3	NLRC5
ATP6V0D1	DMC1	GBA
ATP6V1D	TNNI1	STRIP2
ATP6V1E1	C9orf3	PUS7L
ATP6V1F	CNOT2	PTPRF
ATP6V1G1	TMEM33	TADA1
ATP8A1	YIF1A	CCDC146
ATPAF1	SIRPB1	ZNF548
ATXN1	CSTF1	GLRA1
AVPR1B	CAPZA2	CYB561D1
B3GALT4	KCNJ1	FZD1
BACE1	DRD1	ASCC3
BAG5	ACTN2	BMS1
BANK1	PGAP1	CARM1
BAZ1A	SEC11A	HFE
BBS4	TP53AIP1	FZD4
BCAR3	LOC101060363 /// PPIA	FBXO36
BCAS2	KIAA0196	CNKSR2
BCHE	GMPR2	GORAB
BCL7B	KHSRP	NPPA-AS1
BCL9	MYO9B	ELP3
BCLAF1	APIP	RGS2
BEND5	SAR1B	AAMP
BEST1	TFDP1	ZNF783
BEX2	RP11-680F8.4	SGCB
BEX4	NDUFA5	PDLIM1
BEX5	MEX3D	PLXDC1
BLCAP	YIPF6	MTHFD2
BLOC1S2	GPSM3	MLF2
BMP8A	RNF34	CASC4
BRAP	HTR1A	CCDC40
BRMS1L	SLC38A3	C5orf66
BRWD1	LRCH4 /// SAP25	PRKCQ
BTBD3	POLG	MOK
BTBD6	MYB	AAK1
BTN3A2	ARHGEF28	BFAR
BX088651.1	BIRC7	ZNF568
C10orf107	GCG	CXorf40B
C10orf95	RPLP2P1 /// RPLP2P1	BOLA2-SMG1P6
C11orf1	CCR8	TMEM119
C11orf70	ALS2CL	LOC100130283
C12orf23	TRIM37	PLEKHM1
C12orf76	ARHGAP6	AHSA1
C14orf182	IL19	PARP14
C14orf28	APOL1	NECTIN3
C15ORF37	SMAD4	RBSN
C15orf40	COX11	SHQ1
C16orf87	CYCS	RNF167
C17orf100	CNOT7	ZNF566
C17orf104	MAST2	DHX40
C17orf105	SSX2 /// SSX2B	ZNF398
C17orf82	RPL35A	SETMAR
C1D	HOXC11	FAM220A
C1orf112	ELSPBP1	MCHR1
C1orf132	COPE	RPF2
C1orf233	TBL2	IGFBP5
C1orf52	CUL4B	MFF
C1orf74	RNF122	CLN6
C1QB	MKS1	TOMM20
C1QC	BLM	CLDN15
C1QL1	TMEM248	CRAMP1
C20orf112	CTLA4	TP53BP1
C21orf119	FOXD2	NSUN4
C22orf26	IMP4	TLR5
C2orf70	SCG2	NR2F2
C3orf14	CACFD1	BMP8A
C3orf18	DNAJC12	ABCF3
C3orf33	ST8SIA5	CHST2
C3orf67	SLC39A14	ZNF230
C3orf83	PPP3CB	ATP6V1D
C5AR1	FGF5	NOP14
C5orf55	RHBG	RAPGEF3
C6orf57	CDR2L	PARL
C7orf55	OR2H2	SPRED3
C7orf73	EIF5	CDC40
C8A	PTPN11	SH3BGRL
C8orf4	ZNF468	ANKRD40
C9orf72	LAT2	SUSD1
C9orf91	SLTM	ORMDL1
CACNA1B	LIPA	FCF1
CACNG4	SMAP1	PIP5K1A
CALB1	GRSF1	PLXNA2
CALD1	IQSEC2	PLUT
CALHM1	MLPH	ZNF253
CALHM3	ITPK1	USO1
CAMK2D	TMEM59L	CDH24
CAPN1	DCC	PDXDC1
CAPN13	APPL2	UBXN1
CAPN14	EDF1	CDC73
CAPN7	CHPT1	CALCOCO2
CARTPT	VAMP5	ZNF787
CASC19	TRIM13	STN1
CASP3	RPA2	PPIL4
CASP8	FOXP3	TSTA3
CBLN1	PHOX2A	ZBTB8B
CCDC176	TJAP1	PAK1IP1
CCL26	LOC728392	ZNF451
CCL3L3	LOC101927770	LOC93622
CCNT2	NUPL2	RSL1D1
CCSAP	ARMCX2	LIN37
CD22	FBLN1	CDHR1
CD247	KANSL2	MUL1
CD302	PDCD1	FGGY
CD36	DNASE1L3	FURIN
CD48	DGKI	FZD3
CD97	SLC4A1	PPAN
CDA	ENTPD5	GCHFR
CDC14B	MTRR	CIAO1
CDK17	PRR11	MXD1
CDKL2	FIS1	ZBTB21
CDO1	FZD5	CMIP
CENPC	GPR20	RSAD1
CEP85L	STATH	ZNF605
CERK	CCBL2	SMU1
CFB	SAE1	EIF4A3
CFTR	HIST1H4I	CCT6A
CGRRF1	MIR1304 /// SNORA1 /// SNORA18 /// SNORA32 /// SNORA40 /// SNORA8 /// SNORD5 /// TAF1D	UBE2J2
CHADL	CDHR5	UQCC1
CHCHD2	ACTR1A	CEP192
CHD9	GABRB2	DDX39A
CHGB	LOC100288570	HINFP
CHRM4	CXorf57	DAPK3
CHRNA4	TBX1	PPIP5K2
CHST9	BMP1	GPM6A
CKMT1B	ZCCHC14	SGTB
CLEC14A	ABCB9	GAS2L1
CLIP4	HOXD9	GPR89A
CLLU1	OR5I1	ZC3H18
CLLU1OS	GRM3	ATP2B4
CLPS	DNM1L	FKBP5
CLPSL2	TRA2B	FZR1
CMBL	PRPF18	HPRT1
CNDP2	ODC1	IBTK
CNEP1R1	DNAJC9	CDK20
CNGA4	CCNJL	LOC101927151
CNTFR	PITPNA	BAG6
CNTN4	RNASE2	PODXL
CNTN5	MEF2A	PAF1
COPS3	GPR4	RNF168
COPS7A	XRCC6	SUCLG1
COQ10B	CLCF1	RMND1
CORO2A	PSMA3	RECK
CP	WDR55	CCDC47
CPA1	TBL1XR1	TOMM70
CPB1	RBM25	MARCHF2
CPQ	WSB2	PPP4R3B
CRABP2	PPA1	SLC25A46
CRAMP1L	PIK3IP1	LMF2
CRISPLD1	TTC9	SUSD4
CRY1	STX3	ALMS1
CSPG5	CEMP1	LRFN4
CTA-221G9.7	MFGE8	SBNO1
CTB-43E15.3	CCR4	YIF1B
CTC-332L22.1	EVPL	MAN1C1
CTC-360G5.9	SS18	ZBTB18
CTC-534A2.2	DBH	GMPPB
CTD-2003C8.2	GREM1	PCDHGA12
CTD-2037K23.2	NDUFA7	C12orf4
CTD-2186M15.3	CYP11B1	THOC5
CTD-2207P18.1	MAPK8	TSC22D2
CTD-2526A2.2	CACNB4	TASOR2
CTD-2651B20.1	NDOR1	DENND11
CTD-3220F14.1	PRKCSH	SELENBP1
CTRC	EIF3J	IGDCC4
CYB5R1	SERPINA7	PCYOX1L
CYFIP2	RAB3IL1	UCN3
CYP4F12	KCTD9	PEG3
CYP4F3	KLHL22	TRAF5
CYTH3	LOC79999	MPEG1
CYYR1	SLC9A7	TRIP11
DACH1	EMR1	WDR81
DACH2	EFNA2	MECOM
DAGLA	B3GNT4	DZIP1
DAXX	PTPN21	MAP3K7
DCDC1	FRY	INTS10
DCK	B3GNT3	RABGGTB
DCSTAMP	SNX3	DYNC2H1
DCTN3	APOOL	SNW1
DDA1	TP53I11	RAB2A
DDX23	RNF14	PON2
DEF6	KRT38	DHX16
DEGS1	CDC37P1 /// CDC37P1	BAIAP2-DT
DGCR2	BGLAP /// PMF1 /// PMF1-BGLAP	SLBP
DHX35	SNRPE	CPSF1
DIAPH1	EMC10	LINC02197
DIO1	GOT2	TTC3
DLEU2L	PDLIM7	ZNF587B
DMTN	NGFR	ABHD18
DMWD	CD1A	TIPRL
DMXL1	MOAP1	PRKCZ
DNAH12	C2CD5	NBAS
DNAH5	GLRA2	ERH
DNAH6	CCDC186	PLD1
DNAJB6	PRPF4B	C5orf51
DNAJC18	AOC1	TIMM17A
DNAJC27	MRPL15	NCALD
DNTTIP2	AK021933	RBM15
DOCK11	PNMA1	NEURL1B
DPEP1	TCEAL1	FKBP14
DPP6	TMEM183A /// TMEM183B	SEMA5A
DPPA3	PEG3	SSBP1
DRP2	ADORA3	MIA2
DSCAM	ARF4	AMIGO2
DSCR8	TNNT1	SPR
DTWD1	RNASEL	PROS1
DUSP12	SNX7	GTF2H5
DYNC2LI1	DGCR6L	PLSCR4
DZIP3	PLCB2	EMCN
E2F6	PLA2G2D	NPM1
ECSIT	NOX5	NR4A2
EFCAB2	COX5A	ABHD10
EFCAB4B	FUBP3	ARF1
EFS	GABARAPL2	RARS
EGF	ANKFY1	KRR1
EHD2	FLJ22184	EDC4
EID2	PLK3	RWDD1
EID2B	SMARCA5	FOXJ1
EID3	FCER1A	TTC26
EIF1AD	TFAP4	KCNK1
EIF3J-AS1	C1orf159	ADGRF5
EIF4EBP1	B4GALT5	CSNK1A1
EIF5A2	DEFA6	CPSF7
EMC4	CEP76	C1RL
ENPP5	LILRB1	PRRC1
EPG5	INPP1	CLCC1
EPHA3	MKKS	ANKIB1
EPM2AIP1	GAD2	NXF1
EPO	CETN3	RPS6KA1
ERMAP	CTB-102L5.7	TCEA1
EXOC8	NDST2 /// ZSWIM8-AS1	RHOBTB3
EXOSC5	BCL3 /// MIR8085	TGM2
EXPH5	CBFB	SLC6A9
EYS	MFN2	PAK1
F2R	FBXO3	LPAR6
FAM104A	AMH /// MIR4321	ZNF324B
FAM105A	ART1	RCAN3
FAM124B	BARX2	ZNF324
FAM127C	HLX	NUDT22
FAM150A	GLYAT	DUBR
FAM159B	PACSIN3	ZZEF1
FAM162A	PMEPA1	MCM7
FAM163A	GRIN2B	SURF6
FAM166B	CRYZ	KHDC4
FAM167A	PSD3	FBXO16
FAM168B	NARS2	UBE2D2
FAM171A2	ATP6AP2	UTP18
FAM181B	CORO7	ZNF621
FAM19A4	BTF3	LSM3
FAM200B	RP11-403P17.4	DNAJC16
FAM210B	TMEM131	MED29
FAM212B	HSD17B11	CCNH
FAM215A	ZC3H7B	SPRED2
FAM21A	ZFC3H1	MON2
FAM222A	IL3	INTS4
FAM229B	MDH1	TTC9C
FAM46C	CTSO	PPM1G
FAM53B	HNRNPF	MLLT3
FAM66E	MEGF9	USB1
FAM72B	ZNF721	SLC25A42
FAM76A	EEF1D	ARMCX3
FAM76B	RTEL1	C1orf127
FAM8A1	HOXA10-HOXA9 /// HOXA9 /// MIR196B	DOCK4
FAM90A1	BCL7A	NME7
FAM92A1	ASXL2	MTRF1L
FASTKD3	CSPG4	IKZF5
FAXC	TLE6	EVL
FBXL14	MRPS27	HNRNPUL1
FBXL5	KRT33A	LYNX1
FBXO10	GNE	RASSF6
FBXO11	PLA2G3	CORO1B
FBXO27	C14orf132	DISP3
FBXO43	TNFRSF8	VAPB
FBXO7	EVC	ARCN1
FBXW7	MBTPS2 /// YY2	UGGT1
FCGR1B	ELP4	C11orf58
FEM1A	MRPS11	AZIN2
FFAR1	PUS7	SEZ6
FGF14-AS2	ERLIN1	CD99L2
FGF14-IT1	CDC45	SUFU
FHAD1	EBF2	ZBTB43
FHOD3	TMBIM6	TPT1-AS1
FKBP5	PRODH2	BDH1
FLII	LGR5	CHCHD3
FLT4	AGA	SAMM50
FMNL2	CMTM6	ADK
FOCAD	CTSC	NBR2
FOXO6	PQBP1	ENTPD1
FOXRED2	FLCN	RPS19BP1
FRZB	EIF3E	FANCF
FSBP	TMEM104	SEC61G
FSIP2	ELF5	WHAMM
FTH1	DUSP12	ITGA1
GABARAPL1	EFEMP2	INKA2-AS1
GABPB2	HIST1H2AG /// HIST1H2AH /// HIST1H2AI /// HIST1H2AK /// HIST1H2AL /// HIST1H2AM	RNF113A
GANC	NLRP3	RPN1
GATA4	FAM118A	C14orf93
GATS	CDC123	LINC01843
GBA	ZNF451	DENND3
GC	ALDH1A2	DNAJC1
GCH1	NDUFB6	WIPI2
GDF11	KLHDC4	SEMA4G
GFOD1	CASS4	ATAD2
GGA2	SLC6A8	GK
GINS2	AC068039.4	FAM126B
GJA3	KCNS1	SLC17A9
GJD2	PYHIN1	PICK1
GJD3	ZNF330	TRIM21
GLP2R	UQCRFS1	MINDY1
GLT8D2	TNPO1	SACM1L
GNA12	TMEM50B	ARL5B
GNAI1	RTN3	MATN1
GNAI2	DSCR4	JUND
GNAO1	GRAP2	CDK11B
GNG10	CD3D	DYNLT3
GNG5	LEP	PHF5A
GOLGA6C	MTCH2	AP4B1
GOLGA8G	SIRPA	BAIAP3
GOLGA8M	LOC101927051	SIX5
GPCPD1	TBC1D9	ATOH8
GPM6A	DENND1C	FKBP9
GPR113	SLC13A4	MBOAT4
GPR119	CTC-338M12.4	SMN1
GPR125	RP5-1170D6.1	TRNP1
GPR142	POT1	FBXW2
GPR150	NCKAP1L	RPTOR
GPR157	EPB41	SNX2
GPR27	AOC3	TYW1
GPR52	TBCE	ZFP36L2
GPR64	TM4SF5	STAB1
GPR75	USB1	SLU7
GPR98	ATP6V0A4	ZMYND10
GPT2	NCAPH2	PLA2G12A
GRB10	B4GALT2	FOSB
GRHL2	RBM38	CRIP2
GRK4	ARMCX5	NEPRO
GSE1	MIR3658 /// UCK2	NCBP1
GTF2A2	IGHA1 /// IGHA2 /// IGHD /// IGHG1 /// IGHG3 /// IGHM /// IGHV4-31	ZNF184
GTF3C4	IGLJ3 /// IGLV3-19 /// IGLV3-19	METTL1
GYG1	LOC100505498	ELK1
GYS2	DTWD1	THOC1
GZF1	STXBP1	SLC25A25
H2AFV	ABCD1	CEP350
H2AFY	CRNKL1	CBWD5
HACE1	MYBPC3	SPEF2
HBA1	C20orf195	STX4
HBA2	PDE3A	CANT1
HCN4	PER2	TBRG1
HDGFRP3	IQCA1	PTPRU
HDHD1	PARL	NOM1
HEPACAM2	PTPRN2	CROT
HERC3	DRD5	TRAPPC12
HEY1	ACAA2	ADIPOR1
HHAT	HOXB1	UNC119
HIGD1B	HOMER3	MBD2
HIST3H2A	DERA	TXNDC5
HLA-DMB	EIF3D	CD14
HLA-DRA	GRIA1	TNS2
HLA-G	SRCAP	SRR
HLF	FASTKD3	MX1
HOPX	SKIL	CHST9
HOXA1	RAB6B	TSPAN14
HOXB2	DBF4B	EIF2B1
HOXB3	SCGB2A1	ECHDC3
HOXD3	LILRB3	FKBPL
HPCAL1	SRRM1	DNMT3A
HPD	CASP4	RNF5
HPDL	ADH7	IL10RB
HPSE	RCN2	TGFBR3
HRH4	CCL22	HEXB
HRNR	PLA2G2F	SLC25A53
HS6ST1	RPL15	PBXIP1
HSCB	GFAP	CACUL1
HSF2	SLC35E3	RANGAP1
HSF5	HPCA	INPP5F
HSPA14	PDCD6IP	TMEM11
HSPB11	SNRNP27	METTL16
IDI2	SAMHD1	CCDC88C
IER3IP1	C11orf73	GCN1
IFITM2	VCY /// VCY1B	EARS2
IGFBPL1	GDPD3	ZBTB5
IGFL3	NFE2L2	ATG5
IGSF1	RRN3	MMP15
IGSF21	REST	TSHZ2
IGSF9	LINC01314	ROGDI
IKZF5	ZFR2	TRIM39
IL10RB	AFF2	JADE1
IL32	MB	NDN
IL6R	CSNK1G3	ST3GAL2
ILF3-AS1	PBOV1	GNG10
INCA1	TRAPPC13	ST3GAL5
INF2	IKBKE	VKORC1L1
ING2	TRAIP	CAMSAP1
INSM1	ETNK1	CEP83
IP6K1	CD79B	MYO9A
IPPK	SLIT2	SPATS2L
IQSEC1	APOC2 /// APOC4 /// APOC4-APOC2	DXO
ISCA1	CARKD	TXNL1
ITFG1	HBS1L	ZNF850
ITGA1	SMG5	PWWP2B
ITGAM	WIZ	SESN2
JADE1	PTPRD	LRRC4
JPH4	MYOD1	KDM2B
KANSL1L	REV3L	TXLNG
KBTBD11	SSTR5	HEYL
KBTBD3	ERP44	C7orf26
KBTBD4	MAGEH1	TRIM35
KCNA5	MKL2	PDE4B
KCNC2	PAAF1	SLC1A4
KCNG3	DMP1	CSNK2A1
KCNMB4	CDC73	ISY1-RAB43
KCNT2	SNTB1	CHPF
KCTD14	SCCPDH	RASA4B
KCTD5	GLOD4	TNPO3
KCTD6	SEPT11	SMARCA4
KDELC2	HMBOX1	OCIAD1
KIAA0895	DCUN1D4	C8orf33
KIAA1109	SPCS2	HYKK
KIAA1257	CYP4A11	TERF2
KIAA1324	OR1E1 /// OR1E2	ACBD7
KIAA1328	TNFSF12 /// TNFSF12-TNFSF13	ALG14
KIAA1456	LRRN2	FAF1
KIAA1551	RNF185-AS1	TRIB1
KIF3C	TOR1B	SLC37A4
KLHDC8A	USP34	RSPH3
KLHL15	ACLY	DOK3
KLHL40	NPFFR1	PDIA6
KLHL41	WWP1	RBBP5
KLHL42	KISS1	FEM1A
KLK1	VRTN	HEATR5A
KNDC1	ORC5	SLC25A30
KPNA5	NRG2	ATP1B1
KRBOX4	ZNF160	SOX13
KRT10	SASH3	DNPH1
KRT15	TAF1C	TRPM4
KSR2	SLC19A3	ARL6IP5
L1CAM	TNS4	CDK4
LAMP1	DCAF4	C16orf71
LAMP3	OSBPL7	MAP3K10
LAMP5	ADRA2B	ZNF432
LAMTOR1	GLUD1	FGD5
LARP7	FZD8 /// MIR4683	AVL9
LDB2	MYOG	ANK3
LDLRAD3	ASNS	MVK
LEPREL4	ARG2	ATXN3
LGALS3	CYHR1	LIMA1
LGALS7B	DBET /// DUX4 /// DUX4L1 /// DUX4L2 /// DUX4L24 /// DUX4L3 /// DUX4L4 /// DUX4L5 /// DUX4L6 /// DUX4L7 /// DUX4L8 /// LOC100288289 /// LOC100291626 /// LOC652301	MOCS1
LHX6	RPS6KB2	METTL24
LIMS2	NAT2	TBP
LINC00229	GGNBP2	BLOC1S3
LINC00271	SPAM1	ABCE1
LINC00312	ENG	MYORG
LINC00441	DPF2	PWP1
LINC00461	C22orf29 /// GNB1L	PPP1R13B
LINC00511	NCR2	TPRA1
LINC00526	EPS8L3	LURAP1L
LINC00574	DKC1 /// MIR664B /// SNORA56	ZNF710
LINC00632	CHST5	STK11
LINC00643	KCNN1	DVL3
LINC00663	LRRC40	USP10
LINC00665	TSPYL5	RASGRF2
LINC00683	INPP5D	SRC
LINC00694	PLXDC1	EML2
LINC00870	TBC1D2	SNU13
LINC00877	TH	HAPLN3
LINC00910	REEP5	DDC
LINC00925	XPO1	SCAMP3
LINC00948	S1PR2	CYB561
LINC00960	HBE1	SF3A1
LINC00963	F12	NFIC
LINC01018	CDK3 /// TEN1-CDK3	ATP1A1
LINC01071	GOT1	NCMAP
LINC01108	FCGR2C	MDM4
LINC01116	HDAC7	OPRD1
LINC01138	ATP6V0A2	EEF1AKMT3
LINC01139	A4GALT	ARHGEF28
LINC01155	EGR4	TRIB3
LINGO2	NOP10	PPARA
LMO2	BTN2A1	HTRA1
LOH12CR2	PLEC	EIF3M
LPPR4	NEU3	GID4
LRG1	RAPGEFL1	RAB1A
LRP3	SMC4	ARPC5L
LRRC37A	ZFP36L2	MAPK7
LRRC37A2	IDUA	FASTKD5
LRRC37B	RNF5 /// RNF5P1	DMWD
LRRC42	EBLN2	SDS
LRRC4C	SNAPC4	RGS4
LRRTM4	PLD1	CD93
LRTOMT	LRRC8B	DOHH
LSP1	IL13RA2	SEMA6B
LUZP2	INPP5F	ITGB5
LY6H	INS	STAG1
LYPD3	RHOD	MYDGF
MAFA	ABCG5	CHMP7
MAFB	ZNF614	DNTTIP2
MAGED1	HAND2	COL15A1
MAGED2	FAT1	AMOT
MAGEF1	DCLRE1C	OLIG1
MAGEH1	MIR21 /// VMP1	DHFR2
MAN2B2	DRICH1	STAT5A
MANBAL	MRS2	PIEZO2
MAP1LC3C	ZNF460	GHITM
MAP3K15	TMCO3	FXYD6
MAP3K5	TTTY2 /// TTTY2B	NLGN2
MAP7D1	CNGA1	TOGARAM1
MAP7D2	ANO2	EIF2S2
MAPK1IP1L	SESN1	LIMK2
MAPKAPK5	AMPD1	LGMN
MARCH8	TNIP1	ALYREF
MB21D1	HLA-DOB	MFSD1
MB21D2	MAPK1	ZNF226
MBD4	ADRB1	SPCS2
MBIP	TRIM15	RAB29
MBOAT2	MISP	RNF43
MCOLN1	ATP5A1	ABCC9
MEAF6	RENBP	LMAN1
MED27	DYNLT3	VPS4B
MED4	BRAF /// KIAA1549	ISL1
MEX3B	MFNG	LINC01614
MFSD2A	NBN	DDX47
MFSD4	ANXA2P1	SUDS3
MGAT4C	DNAH17	LOC100996740
MICA	LINC00597	OAS1
MIR4458HG	YIPF2	ABCC1
MKRN3	LOC647070	GIHCG
MMP28	DBF4	GTF2H1
MNS1	ARL3	UBN2
MOAP1	RABGGTA	PMPCA
MOB1B	C19orf40	EAPP
MOGAT1	KRTAP5-9	ATP5F1E
MORF4L1	SLC20A1	LINC01534
MORN2	PMS2 /// PMS2CL	NCS1
MPC1	EIF2B2	ROBO4
MPC2	ZP2	RAB11FIP5
MPPED2	ZNF576	PPP6R1
MR1	NAP1L3	HIPK1
MRAP2	DSE	DDI2
MRPS6	JAK3	RB1
MTERFD2	CDKN2AIP	ARMH4
MTFP1	MAGED2	ATG4B
MTHFD2L	CHRNG	RTN4
MTPAP	FBXO40	TMEM38A
MTURN	CALCR	RSBN1
MUC12	INHA	RPS6KB2
MVB12B	ATG3	ARL5A
MXRA7	CD74	DZIP1L
MYBL1	PRKAR2A	FAM114A1
MYBPHL	RAI1	TMEM97
MYEF2	ARF3	ZNF667-AS1
MYH4	XPC	ZNF454
MYLIP	MGAT2	MAEA
MYO1D	EIF3I	REXO1
MYSM1	EFNB1	EIF3J
MYT1L	DRD2	FOXA2
NAA20	TAF1D	HOPX
NAAA	GHITM	CDC6
NABP1	CD300A	NIPAL2
NAF1	LIN7C	VPS54
NALCN	AKR1B1	RIMS1
NANOS1	MIR6125 /// USP15	POLRMT
NANP	OCRL	TXNL4A
NAPB	LIME1	AKIP1
NBPF24	SCG3	ENTPD7
NCAM1	HP	LPP
NCAPD3	RSBN1	ISLR
NDFIP1	SHQ1	RAB22A
NDNL2	ECHDC3	CMPK1
NDUFA5	EHMT1	AHCTF1
NEGR1	CNN2	TIMM9
NEIL2	SH3GLB1	INF2
NEURL1	PMPCA	PDE6D
NEUROD1	SLC39A7	ZFP41
NGFR	HLA-DRB4	DTX3L
NHEJ1	FLJ11292	LTBP3
NHLRC4	NCK1	LZTS1
NIPSNAP3B	MLC1	FBXO5
NKAP	APOBEC3G	TMEM259
NKX6-3	DEF8	ZNF830
NLRP6	RP11-457I16.2	KLHL35
NOL9	SDHC	NFATC4
NOX4	GOLPH3	TPPP
NPTX2	CPED1	TMEM109
NPTXR	LOC100130741	KCNK16
NR5A2	QRICH1	LIN54
NREP	NDUFA1	PRDM4
NRG1	CLASRP	PLXNB1
NRG4	PTGIS	GLB1
[truncated: 8,226 more rows]

## Sheet: T1D-BFA (without filtering)
Overlap	total	Genes
T1D-BFA	2289	MSRB1
		SLMAP
		RALYL
		ERCC5
		CXCR4
		TMSB10
		ESYT1
		SUMO1
		CCNI
		LINC00683
		PNPT1
		STK16
		BANK1
		NINL
		SCYL3
		SORL1
		C20orf27
		DHRS11
		CMPK2
		CDC25B
		POU3F1
		COL1A1
		PDCD4
		SMYD3
		ANKRD6
		ARHGEF9
		VWA5A
		CNPY4
		BUD31
		MAOA
		RFXAP
		RNF4
		CDK8
		SYT13
		FPGT
		NTHL1
		KIAA0100
		CD82
		PTP4A2
		ID1
		FAXC
		NIPSNAP3B
		MMP15
		DNAL4
		IPP
		TMEM59
		SNX6
		HLA-J
		CAPN1
		IGSF11
		SDC2
		HABP4
		TMEM125
		ASNSD1
		RP9
		ARAP1
		OSBP
		NBPF3
		ASAH1
		RTN4RL1
		OSGEP
		UNC5CL
		MOB1B
		OLFML2A
		UIMC1
		ZNF667
		ZNF738
		NENF
		ZNF487
		TTC13
		CYP3A5
		CENPJ
		AKIRIN1
		ZNF568
		ITSN1
		TTC3
		SEMA3G
		FST
		ARHGEF26
		METTL7B
		ZMYM5
		ZNF586
		SNCAIP
		PELI3
		LIMD2
		PECR
		SERP1
		CASP1
		SECTM1
		B2M
		EIF5A
		NEGR1
		PLRG1
		SPG7
		NUP133
		SNTA1
		PPID
		IL20RA
		PSMD12
		TAF1D
		RABGGTB
		DICER1-AS1
		CALCOCO2
		GEMIN6
		ARSK
		LINC00641
		PROS1
		PSMB8
		SLC16A11
		APOL1
		ZBTB7C
		VAT1
		MAST4
		SOCS3
		TMEM132A
		CGRRF1
		PIANP
		ISCA1
		SLC25A39
		ABHD14B
		ALAS1
		FOXO1
		PSMA5
		PYURF
		ZNF3
		CBX2
		ABI3
		ALDH5A1
		CRTAP
		STMN1
		DPP6
		GRID1
		ATL1
		USP38
		ARHGDIB
		MAGEF1
		ASB4
		SLC12A7
		LINC01139
		MAN1A1
		NEIL2
		PCDH12
		TCHP
		ZDHHC1
		LRRC32
		SLC29A4
		BATF2
		CKMT1B
		SHE
		CCDC117
		IFT172
		NTRK2
		TMEM182
		MFGE8
		PFKFB2
		PRMT5
		DCAF4
		ETV3
		ALOX5AP
		RIPK3
		POLR1B
		OLFM4
		SAMHD1
		SH3PXD2B
		SCG2
		ITGBL1
		KLHDC3
		IPPK
		GNAI1
		CPXM1
		SESN1
		FARP2
		ACOT11
		PRKD2
		MXRA7
		LGALS3
		GLT8D1
		UPB1
		MCOLN3
		PALMD
		CCNB1IP1
		TMEM43
		KCNG3
		OAS2
		ATXN7L3
		DBNDD1
		G6PD
		RTCA
		NRG3
		ABCC5
		C14orf93
		FAM156A
		MAP3K12
		ZNF121
		CMTM4
		C5orf30
		NUDT16L1
		SLC26A2
		RAB22A
		STAU1
		SLC15A3
		MESP1
		HEY1
		CASR
		LIN9
		IRF2
		GNG7
		HEATR6
		RUNX2
		SRPX
		CROCCP2
		TSPEAR
		THRA
		NAB1
		TP53TG1
		CA8
		LAMTOR4
		ICAM3
		ADAP2
		BCL7B
		MAN2B2
		FAM124A
		SLC39A10
		DTD2
		DAGLA
		CHCHD6
		SLC2A4RG
		CLEC2D
		HCN4
		NPM3
		RARRES1
		SLC46A3
		ADCY2
		LDLRAD1
		ZNF135
		FNDC3B
		MICAL1
		BLZF1
		DUS1L
		GSTM5
		APBA3
		PMS1
		SLC25A51
		ZNF814
		CTSO
		HIBADH
		IGFBP3
		SFXN4
		PLA2G12A
		N4BP2L1
		PITPNC1
		NCOA7
		NKX2-2
		ANKRD13D
		GALNS
		KCNJ11
		TPR
		ZSCAN20
		SLC45A1
		KCNJ16
		METTL17
		IRF9
		LBH
		SYNM
		CHCHD2
		SLC4A4
		FLII
		RPS16
		CHPF
		MAP7D1
		TRAM1L1
		TMEM208
		MAFF
		CISD3
		EHHADH
		RBAK
		FKBP9P1
		ITGB5
		HIST2H2BE
		SHMT2
		VWA3B
		NDUFA5
		UQCRH
		RCBTB2
		ZADH2
		MEF2C
		KCTD14
		EIF4EBP2
		CHST8
		THEM6
		HSPB6
		ARV1
		GSTA1
		TRAF3IP2
		NID1
		C1QC
		SMARCC2
		UCN
		ZNF764
		USF2
		NDST1
		PELP1
		ZNF230
		THOC5
		EPDR1
		GPNMB
		AKR1B10
		TIGD6
		SLC39A14
		RGS16
		BCO2
		MOB3C
		LNPEP
		APCDD1L
		DDX27
		RERG
		CHMP5
		CACNB3
		ATP6V0B
		MAGEE1
		CNTN4
		RAP1GAP2
		PLEKHB1
		ZFP37
		PGAP2
		SAMD13
		UGT2B15
		EXD2
		FZD2
		MRAP2
		NOVA2
		PPP1R8
		CCNI2
		PDE6D
		GNG10
		APOL4
		HDDC3
		HMCN1
		CD40
		ZNF318
		WTIP
		PACS2
		HACE1
		ARL4C
		SCD5
		LSG1
		DMPK
		SLC7A14
		SMYD5
		LIPH
		C3orf33
		CYP4F3
		TMEM230
		CROT
		ZNF543
		STOX2
		ZNF566
		ABCB1
		STRADA
		MTF1
		SMIM8
		FAAH
		LTBP2
		ANKRD42
		PDE9A
		ZNF502
		ANXA6
		HIST2H2AA4
		EMID1
		TMEM132C
		MFSD2A
		MAP3K8
		STC1
		TMEM14A
		TCP11L1
		SULT1A1
		RNF19B
		ABCC3
		HLA-DMB
		EXOC8
		HLA-A
		FAM229B
		UBXN10
		STAT3
		SYNJ2
		MBD4
		SLAMF8
		ANKRD11
		EIF5A2
		N6AMT1
		FBXW9
		HEXB
		GALNT12
		SLC35G1
		CRLF1
		PYCR1
		PRR15L
		ZNF497
		SLC30A4
		LINC00473
		CDH6
		THG1L
		ADAMTSL2
		CSE1L
		UGT1A6
		RCAN3
		ATG13
		NMT2
		OSGEPL1
		PFKM
		DKC1
		GCHFR
		GRAMD4
		UBD
		MRPS26
		DNAJB6
		PELI1
		RFC4
		ABLIM2
		KAT2A
		ARRDC4
		TRAPPC10
		CPQ
		CNOT10
		MR1
		FFAR1
		TCAIM
		GDPD1
		NUDT3
		CAMK2G
		SRSF8
		HMGB2
		LINC00870
		KANSL1L
		TMEM100
		UBAP1L
		MVB12B
		ZMYM3
		CASP3
		ZNF429
		ZNF461
		MAGEH1
		RGS2
		NAPA
		PSG9
		BTBD3
		ACSS1
		UBXN8
		MOV10
		TMEM150C
		SERGEF
		B3GALT4
		LEAP2
		CC2D2A
		B3GNT8
		CAPN13
		HTR2B
		PGRMC1
		LYN
		DUSP6
		NAP1L3
		ELK1
		AARSD1
		ADAM33
		LGMN
		NUDT11
		SNPH
		ID4
		INA
		FAM136A
		CLEC14A
		GJA3
		ENPP5
		NQO1
		SLC35E4
		SURF1
		ZBTB1
		GIMAP7
		SERPINB1
		ZNF226
		ZNF773
		BAZ2A
		ZSCAN25
		SIL1
		LDB2
		PGAP3
		C21orf62
		LOH12CR2
		FMO5
		TNFRSF1B
		GTF3C4
		IQSEC1
		PATZ1
		PCDHB16
		SLC25A6
		ISG20
		CASZ1
		GJD2
		SNHG8
		RASD1
		MRPL40
		LY6H
		GSTM3
		EIF3L
		KCNA5
		FLRT2
		SERAC1
		ANAPC5
		DZIP3
		NFATC2IP
		RIT1
		SCML1
		RHBDF2
		MEAF6
		AQP1
		CDC16
		KIAA1614
		WDR5
		SLC41A3
		IFNGR1
		NOL9
		SLC29A2
		MATN2
		ARHGEF6
		DEAF1
		PPP1R16B
		CIB1
		COBL
		HLA-DRB1
		KIAA1328
		SLC25A28
		TMEM150A
		ECHDC2
		CUEDC1
		RP9P
		NDUFA9
		CTPS2
		TBCK
		RNF130
		UCHL5
		ULK3
		TIMP2
		RARS
		PPP1R14C
		RASL11A
		GPRC5B
		KITLG
		HSD11B1
		CTSH
		MFNG
		CDC5L
		TRIM59
		ZNF12
		GSDMD
		TOE1
		PPA1
		ACOX2
		COA3
		C1orf116
		KRBOX4
		CALHM2
		PAM16
		TRNP1
		TRIM25
		HOXB2
		GATM
		CHCHD4
		HEYL
		CUTA
		VAV3
		SUOX
		IDH3B
		SLC18B1
		LRP11
		MTERF2
		LOC730101
		GATA4
		PRKAG1
		C2CD4A
		NDN
		ARNT2
		SPOCK1
		H2AFY
		APBA1
		PLCE1
		PIGX
		APOL2
		HSPB1
		U2SURP
		CYP39A1
		AMZ2
		TPRG1L
		ANKRD13B
		NWD1
		SLC38A5
		UGT2B17
		CERK
		FXYD6
		HLA-DRB5
		CASP6
		OAZ2
		POLR3K
		TMEM240
		PARP16
		PDIA3
		TMCO3
		BIRC5
		GNAS
		TSPAN13
		BCLAF1
		ARHGAP39
		BBS7
		CCDC57
		GTF3C3
		TPI1
		DNAJC5
		GATA6
		RASGRF1
		ZNF484
		IP6K1
		SRSF6
		GJB1
		FRRS1
		RWDD4
		MAFK
		BCAM
		HLA-DRA
		SERF1A
		FUCA2
		EBPL
		GMFG
		PIK3AP1
		AFAP1L1
		ZBTB18
		CLSTN2
		WDR20
		NTAN1
		ARL2BP
		SAC3D1
		COLEC11
		RHOBTB2
		FRYL
		ZNF432
		IL27RA
		STON1
		FOCAD
		CBX6
		TTC21B
		ATP1A1
		ACVR2A
		GNAO1
		SNHG9
		TMEM140
		NUAK1
		CCL26
		RALGPS1
		CCDC6
		MTHFD1
		SEC63
		CCDC113
		PAFAH1B3
		CEBPD
		G6PC2
		ZNF417
		DIXDC1
		CHAMP1
		BMP8A
		FAM114A2
		PDGFD
		PSMC4
		ANKRD22
		FGF14-AS2
		P2RY8
		TRAPPC2
		KRT8
		LMAN2L
		C1GALT1C1
		NFKBIZ
		NSMF
		PANK1
		ZNF157
		PTGS2
		UBE2D3
		SLC25A34
		ENTPD2
		ZNF362
		ZNF781
		HAS2
		NKAP
		SLC30A7
		S100B
		UBE2Q2
		UGT2A3
		SYT7
		DPY19L3
		OLIG1
		EDA2R
		PLCXD3
		PIM3
		KAT8
		DMXL1
		SCFD1
		RASGEF1A
		CTU2
		FGFR4
		TRIM14
		ABRACL
		SLC7A11
		TINAGL1
		DOCK4
		FHAD1
		CHST2
		ZC3H12C
		ACAA2
		FCMR
		PIGK
		TSPAN2
		CTSF
		HUNK
		FBXO25
		ALKBH7
		NME4
		DLL4
		IRF2BPL
		SMARCA1
		PLXND1
		TEAD4
		PIGB
		ZNF608
		SLC25A42
		MMP11
		LRFN4
		RAB24
		CARHSP1
		CCDC102B
		HDDC2
		MDGA1
		VPS35
		DBP
		COL4A2
		ZC4H2
		HAS3
		HEBP1
		C1S
		GLO1
		CD302
		ZNF835
		AAR2
		PLD2
		LDLRAP1
		C5orf63
		PLCH1
		HECTD1
		INSM1
		ZNF493
		GLRA1
		FAM102A
		CTNNBIP1
		LIAS
		GADD45A
		UGGT2
		PSD
		PLAT
		COPE
		EIF3A
		COA4
		YRDC
		KIF12
		RASL12
		FSCN1
		SRD5A1
		POLDIP2
		HSPA14
		C1QTNF6
		OPCML
		DTYMK
		CD74
		PLSCR1
		LIPG
		FEZ1
		NRGN
		DNAAF2
		RNASEH2B
		VAMP5
		DNAJC27
		LACC1
		MTFP1
		FOXS1
		ZNF423
		SLC43A2
		GUSB
		GSDMB
		COPS3
		NID2
		TMEM97
		EXTL2
		MACC1
		TCEA1
		ZNF853
		FAM76A
		IFNLR1
		SBK1
		ADTRP
		PDE4B
		MAFB
		RAC3
		TMEM14B
		SEC14L6
		DNTTIP2
		PCYOX1L
		C18orf32
		TLDC2
		PLPP3
		BAG5
		SDE2
		PPA2
		PDCD1
		PALD1
		ZNF32
		FAM53B
		CAT
		FAM78B
		SEMA4F
		PPP1R11
		GCNT3
		BNIP3L
		STXBP1
		ADM
		LSM2
		CD22
		IMPDH1
		C9orf40
		IDH1
		RAB1A
		SHISA7
		WHAMM
		UBALD2
		ABCC1
		TDRD7
		WIPF1
		RNF181
		TXNL4B
		RNF114
		ITGA7
		NLE1
		CEACAM1
		PWWP2B
		EPAS1
		UBTF
		MORF4L1
		ANKMY2
		ADNP2
		SEC24A
		IFITM1
		GAS6
		AMOT
		TSHR
		GSTM2
		ASB9
		PGS1
		PPARGC1B
		EPHB2
		BHLHE41
		FAM222A
		ANKS3
		ZNF883
		POLA2
		ZC3H12B
		SCO1
		KAT2B
		AMER1
		AS3MT
		B3GNT2
		EYA2
		DCAF17
		CKAP4
		WLS
		OAT
		IQGAP2
		PRCP
		NDUFB1
		LINC00643
		TAF5L
		COL22A1
		MSC
		DCK
		HMGB3
		HOMER3
		TUG1
		SOX13
		GK
		PTPDC1
		IKZF5
		AKAP7
		DNAJC22
		GRK6
		PIGZ
		TCHH
		CYP2U1
		MTHFR
		DACH1
		CALML4
		MPP7
		MRPS34
		ZC3H7A
		RASL10B
		HENMT1
		RAB37
		LMLN
		CSF1
		TNFSF10
		DTX3L
		SCIN
		FAM86B1
		CENPH
		ZNHIT1
		COPZ2
		ELF3
		MYEF2
		ZNF665
		DHRSX
		FAM135B
		KLHDC7B
		PIGR
		RAB11FIP2
		NRP2
		ACP2
		MROH7
		PPARG
		TMEM44
		C12orf10
		ZNF441
		KCTD5
		PARP14
		EPB41L1
		FOXJ2
		ZCCHC18
		IL17RE
		KIAA1549L
		IFIT2
		MAP2K6
		ZC3HAV1
		SLBP
		STEAP4
		C11orf71
		NPTX2
		NME6
		CTSS
		ANO1
		AKIP1
		RAMP1
		EDN3
		NALCN
		SMAD7
		FHL2
		PSMB2
		CDC42BPG
		WARS
		RGL3
		BTBD2
		LMO2
		DDX60
		RPL22
		NYNRIN
		RAB33A
		STK32A
		ZNF792
		AK9
		TTC39C
		INTS10
		ALDH1B1
		RAD51C
		FAM168B
		GAMT
		DRAM1
		CXorf40A
		NOX4
		FRAT2
		SALL2
		PAPPA2
		STK33
		SNUPN
		CLCN7
		PCDHGA9
		NAPEPLD
		DDA1
		CBX8
		COQ3
		KY
		CTSD
		FKBP1B
		CENPBD1P1
		SMIM19
		TMEM80
		OCIAD1
		RBPMS2
		TCEAL4
		BCOR
		CMTM6
		GRB14
		SEMA4B
		NIPAL2
		CCDC151
		EXOSC5
		SPATS2
		KMT5C
		FUZ
		SURF2
		SLC7A8
		EPHX2
		KARS
		PTGDR2
		LIMK2
		HHAT
		MX2
		SHF
		CCDC68
		NDUFC2
		DUOX1
		UBE2G2
		ZNF618
		STX3
		SLCO4A1
		AP5Z1
		DPH5
		HLA-F
		RXRG
		ZNF140
		SLC11A2
		NBEAL2
		TMEM158
		ANKRD16
		MYD88
		ZNF276
		RBCK1
		DENND2C
		GPR37
		ANKRD39
		TNFSF4
		ERICH2
		HTR1F
		SCPEP1
		INHBA
		MTG2
		XPNPEP1
		ADPRH
		TRIM21
		CFI
		NLRC5
		FOXRED2
		SORBS1
		CHST9
		WDR25
		MTURN
		CACNA1A
		TCAF2
		CYS1
		EMC4
		PAXIP1-AS1
		HADH
		IFI30
		DDN
		GJB2
		DNPH1
		HECTD3
		RAPGEF3
		SCARB2
		USP34
		FGD1
		EDC4
		HSP90B1
		TNIP2
		SPC25
		STAP2
		SIDT2
		TMEM231
		ATP6V1G1
		C16orf46
		DDC
		LYPD5
		GLRX5
		CYLD
		WSCD2
		WTAP
		UBE3D
		SERTM1
		USP48
		C1orf35
		THUMPD1
		CYP26B1
		APCDD1
		CMBL
		TMEM163
		GNB5
		IL16
		VCL
		RAVER2
		SMN1
		AKAP5
		PPP2R2D
		CENPV
		PLLP
		NAF1
		LMTK3
		ZNF93
		MEST
		SARDH
		LY6E
		S1PR5
		NRBP2
		CUL4A
		PDZK1
		CFB
		PCP4
		CXCL6
		PDLIM3
		GMNN
		IRF8
		SS18L1
		TIMM21
		BCL3
		ZNF222
		HEPACAM2
		SUPT6H
		TMEM199
		SBK2
		ZNF30
		FZD1
		LAMA4
		ADPRHL2
		NDUFA10
		CLIC2
		TEX30
		CLNS1A
		ING1
		ETV6
		TMSB4X
		CEBPB
		ZNF398
		CAPN7
		ALKBH3
		PARD3
		NRG1
		SLC4A11
		DGCR2
		DHRS4-AS1
		UNC45A
		CISH
		OGDHL
		FUNDC1
		MYBPHL
		FMN2
		SNX21
		SNX17
		SPOCD1
		KCNMA1
		PFKP
		EPB41L4B
		CPXM2
		ANAPC4
		CCDC28B
		HEPH
		PDLIM2
		COPS7A
		WSCD1
		LRRN1
		C4orf3
		NFIA
		ACTR8
		ITGA3
		ZNF510
		TMEM19
		RUNX3
		ZNF623
		PHLDB3
		UGT2B7
		LINC01138
		C1QTNF3
		TRAF5
		LINC00261
		MFF
		NOA1
		TIAL1
		GSTA2
		CORO2A
		ETNK2
		VAT1L
		NRARP
		CCDC43
		OPHN1
		ADH5
		DESI1
		TMEM255A
		BCHE
		KLHL41
		ZNF239
		KIAA1324
		WDFY2
		ZNF284
		C12orf75
		PXDN
		C1QL1
		A4GALT
		TOMM34
		CD6
		PSMD11
		ALAD
		GSTM4
		SAMM50
		TSPAN7
		ZSCAN32
		ARL16
		THAP1
		PCDH18
		DPYD
		MED27
		ABHD12
		AGT
		IL6R
		UBAC2-AS1
		CLDN6
		EPHA4
		ZNF70
		ZNF655
		MRPL15
		RPUSD3
		UBE2L6
		ENHO
		TSN
		XPC
		CEP85
		STAT5A
		HCFC1
		SLC3A1
		COQ10B
		NRF1
		OPA3
		PAQR4
		JADE1
		MICALL1
		GPBP1L1
		TNFAIP6
		ZNF709
		BRD4
		SOX9
		UBTD1
		SVIL
		OAS1
		PHB2
		IGSF9
		TCF21
		NECAB2
		ZNF419
		FAM177A1
		TFE3
		RAB20
		GTF2H5
		ZNF710
		SUMF1
		HCFC1R1
		LYPD3
		SAT2
		KIAA0753
		GABRE
		PPCDC
		KDELR1
		CD83
		SLC16A2
		KDM6B
		MGP
		CYP4F12
		FKBP5
		NUB1
		CCDC85B
		SYNGR4
		GCH1
		TMEM106C
		DNAJC4
		PARVB
		CSRNP1
		NRSN1
		GOLGA6L9
		NRXN1
		ASIC3
		SLC37A1
		GGT6
		IL10RB
		ARHGAP10
		LIN7B
		VCP
		PCSK9
		APOBEC3F
		RALB
		GPM6A
		GBP4
		USP51
		MMP1
		CEP104
		LINC00662
		GTPBP2
		SETD3
		ELK4
		TP53I3
		UCP2
		SLC22A5
		ASPN
		ANKRD65
		URB2
		YBX1
		SCTR
		AAAS
		DACT2
		KCNH3
		PCED1B
		ASH1L-AS1
		WDR70
		SPAG5
		F13A1
		FAM8A1
		C9orf72
		SLC44A3
		HACL1
		BLMH
		RTN2
		CHD7
		SLC30A8
		HIC1
		MYSM1
		SERPINI1
		TMEM38A
		KLHL15
		RAB2B
		MAP3K15
		ZMAT1
		SNX5
		CAPN2
		LRFN1
		FZD5
		NUDT8
		ZNF763
		ZSCAN21
		MYT1L
		APOOL
		ERP27
		CNTN1
		BBS4
		CLPTM1L
		HS6ST1
		TTC39B
		KIAA1257
		ZNF544
		C2orf72
		HM13
		TCERG1
		TOM1L1
		THBS1
		SNAPC5
		SPATA18
		TBX3
		WASH5P
		DAXX
		TAF11
		HIST1H2AC
		APLN
		SSR2
		GDF11
		NEURL1
		PDZD2
		SLC24A1
		PTPN6
		RHOQ
		ZER1
		POLH
		SNAPC2
		FILIP1L
		GAS1
		ZNF263
		STK32B
		ABHD10
		RNH1
		DCXR
		MYL9
		PDIA6
		LURAP1L
		PBXIP1
		CXorf40B
		EHD1
		EFCC1
		MTERF3
		FAT1
		NREP
		CELSR2
		CSTB
		HILPDA
		TMEM50A
		GTF2E2
		NMT1
		ATG12
		SWI5
		PREX1
		DMWD
		VIPAS39
		CALD1
		SCRT1
		ZNF404
		TMED6
		LRRC27
		POLR3F
		TSTD2
		WRNIP1
		ST3GAL5
		PSMA6
		ALMS1
		ABHD14A
		AMPD2
		IFNAR2
		CYB5A
		TSFM
		ABCC8
		WDR3
		STMN2
		HSD17B14
		MAP2K3
		FLT4
		NARS
		PEBP1
		COL1A2
		SERPINA5
		AKT3
		PHF11
		ARSJ
		BAAT
		RBM48
		COL12A1
		ABLIM1
		ACKR3
		FAM171A2
		NYAP2
		HDLBP
		HOPX
		MFSD3
		ESM1
		ARHGEF10L
		RAE1
		CCNA1
		LRP3
		ATP6V0D1
		POLR1C
		ZNF385D
		RNF170
		PTK2B
		LINC01106
		UNC5B
		CALB1
		ZFP3
		DIAPH2
		ACVRL1
		ALKBH1
		SNIP1
		CLDN11
		TIMP3
		MXRA8
		MAML2
		SPAG16
		RAC2
		B3GNT9
		SCOC
		NAPG
		PLCG1
		TAGLN2
		RBM33
		THYN1
		KATNAL1
		CAMSAP3
		C14orf28
		ARL5B
		TMEM223
		VWA8
		CYSLTR2
		ALDH4A1
		LINC00511
		CRYAB
		RASD2
		ZNF175
		SLC40A1
		CD36
		KIAA1143
		HMGN3
		C1QTNF5
		LARS
		BCL9
		ZBTB2
		PI4K2A
		TCEAL8
		PDXK
		IFFO2
		ITGA1
		FAM24B
		MERTK
		BAG1
		COLGALT2
		PRKCD
		TRIM65
		TP53INP2
		TMEM74
		TAPBP
		RUNX1
		SNX10
		STON2
		ABCC4
		FAM171A1
		MAGT1
		ANXA9
		IFITM2
		EARS2
		SH3BGRL
		SLC25A22
		GJA4
		KIAA1217
		C2CD4B
		PLEKHG3
		FRMD6
		AKR7A2
		VEGFC
		ZBTB16
		REG1B
		SUMO3
		SPR
		SAMD9L
		ARHGEF3
		ADAMTS4
		RWDD3
		SLC25A29
		GID4
		TMUB2
		IFNGR2
		ZNRD1ASP
		TBC1D20
		DUSP1
		BCAR1
		CDC42EP2
		C1orf52
		LRPPRC
		TM4SF18
		TMEM169
		SNX2
		ATP1B2
		NKX6-3
		GRHPR
		NEUROD1
		PARP2
		PCDHGB2
		NDFIP2
		ZNF134
		TMEM183A
		ALDH7A1
		SRGN
		EIF3F
		EDEM2
		CCNJL
		EEF1B2
		SCARB1
		CAMK2N1
		SPCS1
		LRP10
		MGMT
		EXOSC8
		SIGMAR1
		LPAR2
		CDC7
		SNX7
		BCL7C
		PPAN
		RNF213
		CNEP1R1
		TNFAIP1
		ACE
		TIGD7
		FOXP4
		CACNA1D
		SGPP2
		CD163
		RGS5
		PRKAR2B
		BBS2
		CLSTN1
		FUT1
		NOCT
		LSP1
		LRRTM4
		GMPPB
		IFI6
		FRMD8
		MGAT2
		AIFM2
		NLN
		POLR2K
		FHOD1
		CDK2AP1
		S1PR1
		GK3P
		RAB3D
		ZKSCAN8
		ATP6V1H
		MUL1
		KIFC2
		ZNF777
		PABPC4
		SPRR2A
		NR5A2
		OXGR1
		HELLS
		TMEM260
		NAV1
		PLAGL2
		PDCL3P4
		TMEM109
		FAM90A1
		PRSS23
		GPN1
		HIF1A
		RELA
		ACAD10
		C1QB
		SEMA4G
		CFTR
		RTP4
		ST14
		GDI2
		BPHL
		EIF2AK4
		BAZ1A
		TCERG1L
		IFI35
		BSCL2
		DDX51
		SLC30A5
		CYB5RL
		SOCS2
		GPR142
		C11orf24
		MBIP
		HLA-DMA
		ITGA11
		IER3IP1
		NIT2
		KLF15
		ARHGEF17
		WSB2
		ME3
		GALNT11
		ZMIZ1
		TMX2
		SUDS3
		NES
		POLR2C
		EIF3K
		MLXIPL
		ENC1
		ARSE
		UBR2
		VOPP1
		STC2
		SAE1
		ANKRD34A
		MIOS
		TCF7
		SAMD9
		MMRN1
		AKR1C3
		SPARC
		MIR22HG
		MOAP1
		CTSZ
		VTI1B
		SEPHS2
		TATDN1
		WNT5B
		SLC25A38
		IFT20
		MCF2L2
		OLA1
		FAM120B
		MAMDC2
		PDIA4
		TESC
		IGFBPL1
		JUN
		NAGK
		RBP1
		PLXDC1
		KIF3C
		CDH5
		DAAM1
		NEK3
		KRT40
		B3GAT3
		MBOAT2
		NPTXR
		TTC7B
		GPC1
		GLS2
		CCDC189
		TOB1
		MNX1
		CMTM7
		C6
		ABHD16A
		PATL1
		SLC25A53
		RANGAP1
		SNCB
		TRIM50
		RNLS
		SPEF2
		KCNK16
		PDF
		TKT
		CMTM8
		PRADC1
		MPL
		HSD17B2
		UBE2G1
		ADCY7
		PPP1R14A
		SIDT1
		C1RL
		GJD3
		PRKRA
		GYS1
		C15orf48
		DCLK3
		SLC4A8
		LINC00665
		BAK1
		RPS5
		TSC22D1
		SHC1
		BLOC1S2
		LIMS2
		RAB19
		ENTPD3
		GLT8D2
		IMPDH2
		INTS6
		SEC14L5
		GPR37L1
		SIX5
		SSTR2
		ZNF529
		ALDH3A2
		DDB2
		SPTSSA
		DYSF
		SLC27A3
		NPC2
		YTHDF1
		DMTN
		QDPR
		FOXA2
		TMEM98
		THAP12
		LAMP3
		KBTBD3
		SORT1
		FAM98B
		NFKB2
		SLC25A35
		FAM76B
		QPRT
		UBXN4
		NPM1
		DNMT3B
		ADRA2A
		EDRF1
		PDE4C
		LDHB
		LTBP1
		PLD6
		RASSF5
		SEC11C
		TMEM14C
		VTCN1
		PKHD1
		MAFA
		HLF
		ITPRIPL2
		ADAMTS2
		AP3B1
		CDH24
		VAMP4
		PRRX1
		GPR119
		MED18
		HCK
		FAM189B
		CLDN9
		VWA2
		C17orf100
		PIEZO2
		IER3
		YWHAH
		TMEM170A
		NTM
		CNDP2
		BEX2
		YPEL5
		AGO2
		DSTYK
		AOC1
		THY1
		TBC1D8
		CACFD1
		ANTXR1
		ETV7
		SPDL1
		WNT5A
		RANBP1
		WBP11
		FAM78A
		H2AFY2
		CCNK
		WNK4
		SGK2
		ZNF740
		USP18
		SLC17A4
		IPO5
		SURF4
		BCAS2
		TPPP3
		ANAPC1
		NFATC3
		EPSTI1
		TMC6
		DMGDH
		PCBD2
		RCN1
		BCAR3
		MDH2
		BCL6
		TXNL4A
		CEP68
		PSEN2
		ATP6V1E1
		ASB1
		TPST2
		ABT1
		MDFI
		POU2F2
		NUDT16
		ZNF74
		SNX29
		HYAL2
		LRRC36
		ATP2A3
		ANGPTL1
		FHOD3
		IGSF21
		OLFM2
		B3GALT2
		CCDC74A
		BEST3
		KLHDC8A
		CNTROB
		INPP5F
		EMCN
		DUSP12
		CGREF1
		VIL1
		ZNF664
		SOGA1
		ZFP62
		TRPM7
		FEM1C
		SERPINB8
		IP6K2
		NXN
		ZMYND19
		RALGAPB
		NAMPT
		VKORC1L1
		HS3ST3B1
		ISLR
		OARD1
		CD99L2
		ATG2A
		PPP2R5B
		RPGRIP1L
		DANCR
		FXR2
		TMED8
		MEX3A
		ARHGEF28
		PALM3
		SLC22A15
		SLC2A6
		GBP1
		PSMG1
		BLCAP
		GNE
		MGAT4C
		TUSC3
		COPG2
		EHD4
		OSBPL1A
		ZNF589
		F2R
		PID1
		DPF1
		NT5DC2
		ARSG
		EIF4EBP1
		C2CD2L
		FBP1
		HIST2H2AA3
		MFAP2
		SOCS1
		ST5
		PHLDA2
		GGCT
		ERLIN1
		SLC29A1
		GLRX
		ST3GAL4
		REG1A
		FBXW7
		SLC25A36
		ZNF26
		CYSRT1
		TDRD6
		H2AFV
		SGCD
		LRRC20
		UBE2Z
		COL4A1
		ISOC1
		STS
		FFAR2
		TP53
		SCO2
		ATP6V1G2
		MX1
		HNF1B
		SRA1
		PPIP5K2
		DYNC2LI1
		RABL2B
		CFLAR
		HAPLN3
		ACACB
		FAM210B
		TRAK1
		GRAP
		RORC
		ELMSAN1
		MXD1
		WDR37
		NUAK2
		SNHG1
		MANSC1
		MANBA
		IL1B
		NSG1
		RNF8
		PTPRU
		SIAE
		ZMPSTE24
		TESK2
		EIF1AD
		PCDHB5
		NOD2
		PRELP
		GYG1
		POLR3GL
		SERP2
		WDR13
		GAPDH
		MOCS2
		CYBRD1
		PARP9
		TMEM88
		PLEKHA6
		AMIGO2
		TMEM26
		EVPL
		PIM2
		SLC17A5
		PIPOX
		SOX18
		SERPINA10
		SYNGR1
		REEP2
		GINS2
		IFIT3
		RRN3
		MYO1B
		PLAU
		C1R
[truncated: 290 more rows]

## Sheet: T2D-BFA (without filtering)
Overlap	total	Genes
T2D-BFA	3540	ELMO2
		CREB3L1
		PNMA1
		SLMAP
		HAUS2
		SMARCD3
		ESYT1
		LMAN1
		DDB1
		CRNKL1
		XAB2
		RTN1
		KBTBD8
		SEMA4D
		INIP
		BANK1
		NR4A2
		LONP1
		PPCS
		CHD1
		FAHD1
		CMPK2
		SLCO2B1
		ABCD4
		TEK
		SLC25A46
		TERF2IP
		GRK5
		CA11
		ALDOC
		NUDT1
		ACBD3
		CEP350
		LOC100506098
		LGI2
		WDR45
		CNPY4
		ZDHHC6
		DUSP4
		RMND5B
		CCNY
		ROR2
		ZBTB48
		BUD31
		MAOA
		RFXAP
		CDK8
		RNF4
		PPP1R3D
		SYT13
		EIF1
		CETN3
		POLR2B
		GPN2
		GCC2
		PLXNA1
		CD82
		SETDB1
		LOC100287497
		PTP4A2
		HPCA
		MLF1
		TAF12
		THADA
		ID1
		SF3B6
		CXorf56
		MTMR14
		ASS1
		TMEM59
		SEC23IP
		RGS4
		SNX6
		ADAM23
		NCDN
		TMEM104
		LRRC8A
		GNA11
		OGFOD2
		SDC2
		METTL21A
		SARS
		SETMAR
		AHCYL2
		PEX16
		HABP4
		TMEM125
		UBN2
		ASNSD1
		UFL1
		HGH1
		TMEM11
		SLC9A3R1
		OSBP
		DNHD1
		FKBP4
		NADSYN1
		RGS14
		OSGEP
		ARMC6
		PSMD5
		EIF4A3
		PRPF3
		CHMP2B
		CAMSAP1
		PIGL
		KIF19
		UIMC1
		GOT2
		KIN
		PDAP1
		ZNF146
		MIA2
		MANF
		ZNF487
		NENF
		TTC13
		CYP3A5
		AKIRIN1
		RDX
		DNAJC9
		JUND
		MRTO4
		NDUFB8
		TMEM248
		SEMA3G
		SLC2A10
		OSER1
		PREX2
		KIAA0930
		METTL7B
		SNCAIP
		PECR
		HSPA2
		SERP1
		PIGG
		DPYSL4
		ZNF264
		RAB5A
		DCAF11
		SECTM1
		TCTA
		LAMTOR5
		SQLE
		GLIPR2
		EIF5A
		PLRG1
		ZNF614
		XXYLT1
		GRPEL2
		TLR5
		SAFB2
		PSMD12
		ERCC8
		TAF1D
		PCED1A
		DVL1
		CMKLR1
		PEF1
		ZFAS1
		ALG9
		BAIAP3
		DICER1-AS1
		RABGGTB
		CALCOCO2
		SPATS2L
		HRAS
		GEMIN6
		LINC-PINT
		JAGN1
		RNF43
		PHF12
		SRRD
		PSMB8
		PPP6R2
		APOL1
		VAT1
		CCDC14
		MAST4
		KCTD2
		NR4A3
		ARSA
		SOCS3
		TMEM132A
		CGRRF1
		MCAT
		PIANP
		EPN1
		BRICD5
		WDPCP
		NIPA2
		MAGI1
		PCYT1B
		AUH
		EIF3H
		MBD2
		PIGT
		ALAS1
		FOXO1
		MRPL37
		KIF5C
		CRLF3
		PSMA5
		TSEN54
		CBX2
		CNOT2
		ABI3
		RBMXL1
		CRTAP
		DDX50
		STMN1
		CCZ1B
		MMP24
		CKS2
		RPS6KA2
		MRO
		TDP1
		ZNF287
		DNAJB11
		GBA2
		FMNL1
		ZNF165
		USP38
		ARMCX3
		ARHGDIB
		NDE1
		CACNA1C
		FAM20B
		BRI3BP
		OBSL1
		SLC12A7
		RBM4B
		PPP1R15A
		FCGR2A
		BMF
		MAN1A1
		NKAIN1
		FBXO34
		RB1CC1
		PCDH12
		EIF4E
		CSDC2
		ABHD5
		TCHP
		BATF2
		SLC35F5
		ATP2C2
		CD276
		PIK3C2B
		SLC31A1
		IFT172
		COMMD1
		FOXN3
		TMEM182
		MFGE8
		RNF167
		PRMT5
		ZSCAN12P1
		DCAF4
		ETV3
		RNF126
		CEP63
		DPM1
		TNK1
		POLR1B
		SH3PXD2B
		SAMHD1
		SCG2
		SLC17A6
		PKD1P1
		NLK
		GNAI1
		VPS4B
		NDRG1
		SESN1
		FARP2
		ACOT11
		DZIP1
		GPR161
		WDR74
		PCNP
		NEO1
		MXRA7
		GLT8D1
		LAT
		KCNA3
		FCF1
		SMARCA4
		MASP2
		ZBTB21
		CCNB1IP1
		TMEM43
		TTL
		STAT5B
		ENPEP
		SSB
		SH3D21
		SEC61G
		GLIS3
		TMEM50B
		DBNDD1
		TBL1XR1
		SZT2
		G6PD
		NUDC
		EIF3J
		RTCA
		MFN1
		NRG3
		LPCAT4
		CAMSAP2
		ABCC5
		MOCOS
		FUT11
		MAP3K12
		ZNF121
		PIWIL2
		SYNE1
		CMTM4
		PSMG3-AS1
		WDR44
		HCG18
		BTBD18
		DCAF13
		BHLHE40
		KLHL31
		SLC26A2
		RAB22A
		STAU1
		CRB3
		DDX21
		ZNF160
		BARX1
		DHX29
		MTO1
		LOC100996724
		SLC15A3
		TM9SF2
		ITGAX
		MTPN
		CANT1
		LIN9
		UNC50
		GNG7
		RUNX2
		CROCCP2
		MAPK11
		HIP1R
		ZNF204P
		NAB1
		MED31
		RAP2A
		CRIP1
		AZIN1
		ARG2
		NOL7
		TSLP
		ADAP2
		TAF8
		RNF139
		ADAM8
		RGS12
		LRRIQ1
		TOMM5
		C2orf68
		CHP1
		ACAP2
		ACP1
		LOC283177
		SLC2A4RG
		KIZ
		HCN4
		FAM214B
		NPM3
		RARRES1
		ITCH
		MGAT3
		SLC2A2
		ADCY4
		SLC46A3
		PTRH2
		SSH3
		ZNF135
		TIMM50
		HDAC1
		CNIH1
		LMCD1
		MICAL1
		BLZF1
		SARAF
		RIMKLA
		TOMM40
		MBNL1-AS1
		ADNP
		SNRPB2
		KDELR2
		ZNF570
		CTSO
		MARS2
		SDF2L1
		HIBADH
		IGFBP3
		DEK
		PSPC1
		ALB
		AGBL2
		C1QA
		ZNF703
		VAMP7
		SPRED2
		N4BP2L1
		PITPNC1
		HAUS3
		LIN7C
		FUT2
		STX6
		HIST1H1C
		PDK3
		TPR
		KRBA1
		HOXB7
		METTL17
		IRF9
		MCPH1
		SYNM
		HINT1
		CHCHD2
		DYNLT3
		FKBP11
		CHPF
		CSNK2A1
		RPL14
		TMEM208
		MAFF
		CCT6A
		RBAK
		ARID1A
		STARD7
		SHMT2
		NDUFA5
		ZNF251
		RPP38
		RCBTB2
		RBMS1
		HNRNPUL2-BSCL2
		SAFB
		RFX2
		ANKZF1
		SENP5
		CBFA2T3
		LZTS2
		ANKRD37
		FZR1
		MMS19
		GMPR2
		ST8SIA5
		LPP
		ORC3
		EIF4EBP2
		DFFB
		HSPB6
		NMB
		EIF6
		AIFM1
		GSTA1
		SLTM
		STARD4-AS1
		ARVCF
		RENBP
		C1QC
		ZNF783
		ZNF85
		CLGN
		TFDP2
		POLI
		UCN
		FHL3
		SPATA5L1
		PELP1
		RNF41
		SERINC3
		EPDR1
		AKR1B10
		SLC39A14
		RGS16
		BCO2
		NFATC4
		TMEM60
		BMPR1A
		FUBP3
		MOB3C
		TMEM127
		YARS2
		APCDD1L
		ZCCHC4
		ZNF669
		CDK12
		CACNB3
		THAP11
		NEK4
		PRKAR2A
		ATP6V0B
		SPATA17
		OSTF1
		PLEKHB1
		MRPL33
		PELO
		ARMC1
		IDI2-AS1
		PON1
		HBEGF
		GNPDA1
		UGT2B15
		PGAP2
		FZD2
		PSMB6
		MRAP2
		PPP1R8
		TNFRSF11B
		GOLPH3
		PIBF1
		TNFSF15
		HSD17B11
		GABRR2
		URI1
		DHDDS
		NEFM
		APOL4
		ANKRD28
		MRPL28
		SNRK-AS1
		RAB14
		PIGV
		CDK2AP2
		CHD3
		CD40
		GSN-AS1
		CCDC186
		GSAP
		IGFBP7
		ZNF609
		MED10
		EHMT2
		PACS2
		LSG1
		FBRSL1
		DMPK
		CBR4
		SMC1A
		IDNK
		NPPA-AS1
		TUSC2
		ENAH
		RCC2
		TMEM230
		ZNF543
		CD58
		EXOSC9
		ABCB1
		SSR3
		ITGB7
		RNASEH1-AS1
		DNAJC7
		CHKB
		ACCS
		RRAS2
		LTBP2
		ZDHHC4
		PDE9A
		LEF1
		PEAK1
		SERPINB2
		PITHD1
		GTF2F2
		RNF113A
		NHP2
		MOCS3
		TMEM132C
		ANKS1B
		MFSD2A
		TMEM47
		RPAP3
		EFCAB14
		PLEKHA3
		TMEM14A
		TCP11L1
		CWF19L1
		MYH3
		SULT1A1
		YY1AP1
		ARPP19
		RRAGA
		HLA-DMB
		EXOC8
		HLA-A
		SAMD1
		UBXN10
		SYNJ2
		WDR36
		ST3GAL6
		SLAMF8
		ROBO1
		LINC01091
		INPP1
		ROR1-AS1
		EIF5A2
		CPM
		TMEM214
		DGKB
		GALNT12
		MRPL35
		TNKS
		CRLF1
		CDK5R2
		WAS
		TUB
		KCNK1
		SUMF2
		TMED5
		CDH6
		AQR
		THG1L
		GOLGA5
		CSE1L
		ASRGL1
		ZBTB11-AS1
		TOM1
		CENPN
		TMED2
		C2orf76
		STYX
		ATG13
		U2AF1
		PFKM
		CREBZF
		RIOK3
		GCHFR
		ATG9A
		DNAJB6
		PPT1
		UBE2B
		RFC4
		BCL2L13
		CCDC30
		NUP50
		KAT2A
		CCDC130
		ARRDC4
		MTUS1
		CPQ
		GTF3C2
		MR1
		MRPS30
		ATL3
		TCAIM
		MIEF1
		PRR14
		ZBTB6
		PRR11
		NUDT3
		SRSF8
		HMGB2
		PTAR1
		PRICKLE2
		POLR2D
		TOR1B
		MVB12B
		ZMYM3
		CASP3
		CACNA2D3
		SUCLG1
		TMEM67
		WDR47
		PRPF40A
		MAGEH1
		CLDN12
		TUBE1
		DDX19A
		TMA16
		MOB3A
		GFM2
		PSG9
		ARHGEF11
		BTBD3
		PPP1R2
		UBXN8
		TUBA4A
		EEF2
		LRIF1
		SCYL2
		PEX2
		MYH14
		LEAP2
		GADD45G
		SLU7
		B3GNT3
		SAP130
		PCDH1
		NIFK
		CAPZA1
		GLRX3
		CCR1
		NUS1
		PGRMC1
		DNAJA2
		ZNF512
		LYN
		TGFB3
		ELK1
		NAP1L3
		ADAM33
		COX6B1
		MAPK6
		NTMT1
		NUDT11
		PYGL
		NUCB2
		FOXO4
		ID4
		NOD1
		INA
		RIN3
		MED17
		PIGA
		NQO1
		TOX4
		HSPA9
		AXIN2
		ZBTB1
		TAF1
		GIMAP7
		AP1G2
		UTP3
		GRIK5
		LOC441204
		ORMDL2
		GGT7
		MOK
		ZNF226
		KCNQ2
		HTATIP2
		LINC01137
		ING4
		AP3M1
		CORO1A
		CEP76
		ZNF460
		OS9
		COG5
		COPS8
		AKAP9
		GPSM3
		ENTPD3-AS1
		LDB2
		MRPS23
		PGAP3
		EFEMP2
		EFNB2
		C21orf62
		LOH12CR2
		NMNAT3
		NOB1
		TSG101
		CEBPG
		GTF3C4
		TNFRSF1B
		PATZ1
		PLEKHG6
		SMG5
		MRPL49
		ASNS
		ISG20
		GJD2
		CASZ1
		GIN1
		TMEM177
		KRR1
		CDKN2AIP
		MRPL40
		COMMD3
		NR2F1-AS1
		LY6H
		LRRC59
		LARP1B
		EDEM1
		CDC73
		FAM43A
		GSTM3
		SCML1
		FBXW11
		SAP30BP
		WDR76
		MEAF6
		GPRASP1
		ZFAND3
		HSPH1
		SPSB3
		CDC16
		KIAA1614
		ZSWIM5
		UBA2
		RBM18
		WDR5
		RANBP10
		MYO7A
		ACVR1B
		DENND1C
		CIB1
		PPP1R16B
		CTNNAL1
		TLE6
		DRAP1
		SLC38A1
		ARHGAP6
		MYO1F
		SETD7
		RBM8A
		ITGA9
		ZFR
		KCNB1
		CANX
		SLC25A28
		DESI2
		ANKIB1
		TMEM150A
		ECHDC2
		SMA4
		PABPC1
		CUEDC1
		STARD9
		GPRIN3
		TSR1
		CCDC85A
		TMEM126B
		NDUFA9
		SCRIB
		EGLN3
		FBXO45
		TBCK
		EIF2S2
		RNF130
		UCHL5
		ULK3
		SMIM15
		PNO1
		RARS
		DSN1
		GPRC5B
		RASL11A
		KITLG
		SETX
		TTC9C
		MFNG
		FEZ2
		DLAT
		THSD4
		CDC5L
		LMNA
		SRSF5
		SNED1
		WNK1
		GSDMD
		RECQL4
		PPA1
		GTF2H3
		C1orf116
		CALHM2
		TXNDC17
		TRNP1
		TRIM25
		CRKL
		ZNF133
		NUDCD1
		PHTF2
		CHCHD4
		WAC
		IWS1
		PCGF1
		PRKCQ-AS1
		MTMR11
		IDH3B
		GOLT1B
		ALDH9A1
		SUSD1
		RASSF1
		LRIG2
		PAK2
		PRKAG1
		FCHSD1
		HLX
		LOC100507507
		C2CD4A
		GNL2
		PFDN2
		FBLN5
		KLHL24
		SGPP1
		ZNHIT6
		ZNF638
		APBA1
		RAB2A
		GRAP2
		TACC2
		HSPB1
		INPP5E
		COX7A2L
		ITPK1
		CYP39A1
		RBM15
		AMZ2
		GDF15
		CYCS
		KIAA0895L
		DDX11
		IMP4
		ANKRD13B
		NDUFS1
		ARRDC2
		CD2BP2
		TOP3A
		NDUFAF4
		CERK
		GOT1
		CASP6
		RCL1
		PIKFYVE
		LRRN2
		B3GAT1
		NOC4L
		POLR3K
		ATG2B
		ARL4A
		GPR153
		DAD1
		HSD11B2
		CAND1
		ACTR10
		NASP
		APOBR
		KPNA2
		TMCO3
		GNAS
		KATNB1
		BCLAF1
		TRA2B
		GLE1
		DHRS7
		GTF3C3
		GTF2IP4
		ALDH18A1
		TPI1
		DNAJC5
		DAPK3
		EMP2
		SRSF6
		GJB1
		POLE3
		RIN2
		ATAD1
		USP7
		YME1L1
		TPCN1
		PCBP4
		CDH10
		SON
		MZT1
		PSMD3
		BCAM
		C14orf132
		PCK2
		HLA-DRA
		EDNRA
		EIF3M
		ZNF24
		FUCA2
		HHLA2
		SMAD9
		USP19
		LSM12
		GDAP1L1
		NUP88
		CD300A
		MOB4
		DHX16
		SLC35A5
		ARL2BP
		TTLL11
		CCDC18
		NGDN
		STK40
		AGGF1
		PJA2
		PHF1
		AGTRAP
		STON1
		NDNF
		FBXO36
		MTR
		MLIP
		TPMT
		ZNF672
		PLXNB3
		ACVR2A
		PGM2L1
		OPA1
		TMEM140
		PRPF39
		DISC1
		DZANK1
		CLTCL1
		CCL26
		CCDC6
		RASSF4
		MTHFD1
		SEC63
		TOR1AIP1
		PAFAH1B3
		CTSB
		SIRT2
		MEIS1
		BMP8A
		PSMC4
		TUBA1A
		PSMD8
		RARS2
		MAP1LC3B
		P2RY8
		CYB5R4
		KRT8
		C1GALT1C1
		FDFT1
		PTGS2
		UBE2D3
		SPIDR
		LRP5
		ARFGEF2
		MAP1A
		NELFCD
		EME2
		NAV2
		ENTPD2
		ADH1C
		CNOT7
		NKAP
		EAF1
		LRRC61
		SLC30A7
		S100B
		PGGT1B
		KCNN3
		DPY19L3
		SCCPDH
		OLIG1
		CDK4
		OLIG3
		EDA2R
		LOC101928907
		DENND2A
		KAT8
		DMXL1
		RBM3
		DMTF1
		GRM1
		SCFD1
		IBA57
		GAP43
		PDE3A
		TNFRSF10C
		RASGEF1A
		NTPCR
		XPOT
		TRIM14
		ABRACL
		SLC7A11
		DERL2
		FHL5
		TINAGL1
		FHAD1
		NAA15
		ORC5
		TMEM259
		PTGIR
		ACAA2
		GLCE
		FCMR
		TSPAN2
		BROX
		CTSF
		FBXO25
		CHD1L
		TRMT11
		PTTG1
		TMEM62
		SSBP2
		HABP2
		REEP1
		FBXO15
		CHMP4C
		RGS1
		PLXND1
		TEAD4
		DTX4
		TIMM8A
		TRIP11
		POT1
		MMP11
		MYO1E
		UCHL3
		LRFN4
		GREM2
		CCDC102B
		HDDC2
		MTUS2
		DBP
		COL5A3
		HEBP1
		LUM
		UBASH3B
		KPNA4
		GLO1
		WDR61
		ZNF835
		DYRK3
		HNRNPD
		RBM34
		AAR2
		PLD2
		PALM
		PUM2
		CMSS1
		ARX
		ANGPTL4
		HHEX
		EMC2
		ACOT13
		INSM1
		GLRA1
		CTNNBIP1
		HMGN2
		TBCE
		LIAS
		GADD45A
		TMEM70
		SBF1
		PPP3R1
		USP46
		SPI1
		DCAF6
		OXSM
		SF3A1
		COPE
		EIF3A
		COA4
		YRDC
		KIF12
		BLVRA
		RASL12
		CASC15
		BOK
		PGAP1
		FSCN1
		UBAC2
		SIRPA
		TSC22D2
		TYW5
		ARHGEF15
		RAB3GAP2
		UFSP2
		HSPA14
		BRD7
		DTYMK
		SLAIN2
		QTRT1
		CCNT1
		WDR53
		CD74
		FEZ1
		SLC35E1
		LAD1
		MAPK8
		DNAJC8
		HDAC8
		SRP54
		NRGN
		DNAAF2
		VAMP5
		SYTL2
		LACC1
		MTFP1
		UXS1
		GTF2B
		SLC43A2
		GUSB
		LIG1
		COPS3
		NID2
		LSM8
		ZNF616
		MRPS16
		TCEA1
		SUSD4
		WFDC2
		SETD1B
		SSR1
		OSBPL9
		NUP107
		PDE4B
		CCDC87
		MAPRE2
		ARFGAP3
		MAFB
		AK6
		TMEM14B
		GFER
		TNNI1
		DNTTIP2
		GOSR2
		DDX1
		LCP2
		VPS54
		PEX5
		UNC80
		SDE2
		MCUR1
		MED24
		PDCD1
		IMMP2L
		AKR1C1
		BRD2
		CAT
		SLC7A1
		AGAP3
		TPM2
		OLFML3
		ELAVL1
		GCNT3
		ABCA2
		PITRM1
		STXBP1
		ADM
		LSM2
		PRKACA
		PPP1R1A
		KATNAL2
		RAB1A
		WDR90
		SHISA7
		KMO
		WHAMM
		USO1
		ABCC1
		LMF2
		PCBP2
		MUC13
		MFAP1
		WIPF1
		MMADHC
		RNF181
		SNTB1
		SLC24A3
		UBE3A
		SNRNP200
		ITGA7
		ZNF252P
		ZFAND2A
		LRRC57
		WDYHV1
		SEMA6B
		MORF4L1
		ENGASE
		RRP15
		GALNT1
		RSL1D1
		SBNO1
		ANKMY2
		ADNP2
		ARCN1
		IFITM1
		FBXO28
		TSHR
		GSTM2
		ERGIC2
		NAT1
		MTCH2
		PGS1
		HAP1
		EPHB2
		COL27A1
		CCDC78
		NME1
		SYT16
		ANKS3
		SRRM2
		CAAP1
		POLA2
		KCNJ8
		NOL10
		RANBP9
		EVL
		LNX1
		NUDT21
		ERC1
		NKIRAS2
		SCO1
		PDLIM5
		C1orf43
		TMEM54
		LETMD1
		PHF23
		B3GNT2
		EYA2
		S1PR3
		CKAP4
		PITPNM1
		RNASEH1
		OAT
		ACTR3C
		HYAL3
		SMNDC1
		SLC30A9
		PRCP
		YIF1B
		FAN1
		TAF5L
		CCDC59
		MED20
		LINC00884
		TOMM20
		COL22A1
		GTF2A1
		AGFG1
		MRPS35
		MSC
		PROZ
		SEC23B
		DCK
		SPTLC1
		HMGB3
		TOPBP1
		HOMER3
		KLF11
		KCNAB3
		EXOC5
		GK
		UBE2E3
		METTL8
		SLC39A7
		PRDX6
		ILF2
		ASCC3
		DNAJC22
		TMEM18
		PIGZ
		CRLS1
		CYP2U1
		CSGALNACT2
		PLK3
		KDM5C
		RSL24D1
		UBE2F
		DAP3
		ZC3H7A
		SSBP4
		KLF16
		MFAP3
		ADAT2
		PRPF19
		LDLRAD4
		RPA2
		NABP2
		ULK1
		FEM1B
		KIF5B
		UHRF2
		NUP153
		CENPH
		CLPTM1
		ELF3
		NUDT7
		GPI
		RAD9A
		FAM135B
		E2F1
		KLHDC7B
		GPATCH2L
		RAB11FIP2
		TSC2
		NRP2
		CPSF7
		MROH7
		SPTAN1
		TENM2
		LOC102724814
		ISOC2
		PRDM4
		HSPA4
		DHX40
		RRP9
		RAB26
		EVI5
		IFT80
		MYL6
		KCTD5
		EPB41L1
		DYM
		TOM1L2
		RAB21
		RPS19BP1
		KIAA1549L
		ZNF343
		CORO1B
		MAP2K6
		ZC3HAV1
		YY1
		SLBP
		CKS1B
		SLC19A3
		CDC37L1
		FES
		TTC25
		NME6
		AP2M1
		SNAPC4
		SLC9A7
		FAF1
		P2RY1
		AKTIP
		FURIN
		UQCRFS1
		SMIM12
		EDN3
		BLM
		NALCN
		GMIP
		SF3A2
		SMAD7
		FHL2
		RRN3P1
		CDC42BPG
		PSMB2
		WARS
		RGL3
		LMO2
		PDPR
		PTK7
		PPP2CB
		DOLPP1
		CYC1
		EPRS
		CHUK
		HR
		TTBK1
		GPN3
		TTC39C
		THOC1
		KXD1
		INTS10
		ZNF124
		NICN1
		SPRED1
		AP5M1
		RAD51C
		PARP6
		PRPS1
		DRAM1
		CXorf40A
		FRAT2
		MCHR1
		ZNF101
		MPHOSPH8
		LRFN2
		TULP4
		PAPPA2
		STK33
		OSTM1
		NAPEPLD
		DDA1
		STRAP
		CBX8
		MTMR10
		PRMT6
		NDUFB6
		FKBP1B
		MRPL17
		CENPBD1P1
		CXXC5
		VAV2
		TP53BP1
		ERCC3
		TFRC
		TMEM80
		DDX46
		AK2
		CMTM6
		ARAP3
		NIPAL2
		CSNK1A1
		CCNC
		CHKA
		DHRS3
		IQCB1
		SPATS2
		COA1
		SKIV2L
		ATF4
		ZNF829
		RAPGEF4
		FUZ
		ZNF696
		FAF2
		PDCD10
		ACADS
		MKRN2
		ENKD1
		PSME4
		TFG
		ANXA5
		KARS
		ATF7IP
		ETF1
		HHAT
		UBE4A
		CCDC68
		SEL1L
		DUOX1
		TRAPPC13
		EIF4B
		BTF3L4
		DDX55
		GOLGA7
		BLOC1S1
		CD34
		STX3
		ACYP1
		ENG
		GAPVD1
		PHIP
		SLC11A2
		NIP7
		TMEM158
		COLCA2
		SS18
		CARM1
		ARHGEF37
		CBFB
		DPP3
		TUBB2A
		YPEL4
		ZNF276
		RBCK1
		PLXNA2
		LONRF3
		COPS5
		TVP23B
		HERPUD1
		SCPEP1
		SLC36A1
		LOXL2
		DENR
		SENP2
		ADPRH
		RAP1B
		PRKG1
		P2RY6
		NLRC5
		CYP20A1
		SORBS1
		PEA15
		NDUFAF2
		PACSIN1
		FNBP4
		WDR25
		GPR4
		SGCA
		GALK2
		DCAF15
		RAB3B
		ZNF451
		CYS1
		ZNF286A
		ZNF302
		ENY2
		CALU
		ANKFY1
		DENND3
		CMPK1
		RWDD1
		SLC18A2
		ASIC2
		GNPNAT1
		ZNF526
		DDN
		ELOVL6
		EPHX1
		PPIL2
		GJB2
		RAPGEF3
		LGALS9
		SCARB2
		MAPK3
		USP34
		ADK
		TGOLN2
		CTBS
		FGD1
		EDC4
		MPZL3
		HOXB6
		STAP2
		TRIM44
		PARL
		SIDT2
		RYR2
		TRIM32
		PTS
		ATP6V1G1
		ADCY6
		DDC
		GLRX5
		TTLL3
		PIP4K2C
		WSCD2
		TSC22D4
		STK35
		CCNH
		USP48
		APOBEC3C
		RUSC2
		RAD17
		ZCCHC8
		CD5
		CYP26B1
		CMBL
		TMEM163
		VCL
		FYTTD1
		SERPINE1
		IRGQ
		RAVER2
		AKAP5
		EDARADD
		CREBRF
		LRRFIP2
		PLLP
		RNF121
		BCCIP
		OXSR1
		MEST
		RBBP5
		ANGPTL2
		HBS1L
		TMEM30A
		NCAPH2
		CRK
		NEDD9
		RNASET2
		LOC101928504
		ETV5
		BTBD7
		S1PR5
		GSTO1
		CORO7
		LSM1
		UBIAD1
		CDC42BPB
		CAPN10
		PDLIM3
		ZNHIT3
		SNRPD3
		UNC93B1
		SPCS2
		PRKAB1
		RPUSD4
		IRF8
		SS18L1
		ITGB3
		MAP7D3
		ARPIN
		RBM27
		WDR55
		HEPACAM2
		CERCAM
		GIPC1
		ZNF770
		FZD1
		LAMA4
		ADPRHL2
		NDUFA10
		RNF13
		PAXBP1-AS1
		ETNK1
		CEP44
		TEX30
		CLNS1A
		ZXDB
		UBR7
		CHAC2
		CAPN7
		RANBP2
		TTC9
		MLPH
		ZNF557
		TGFBI
		DDX41
		UBE2D2
		PGM3
		ZBTB49
		MARVELD2
		DHRS4-AS1
		OGDHL
		HSPG2
		SLC52A2
		DUSP9
		C21orf58
		NANS
		ATP10B
		FUNDC1
		MISP
		GRIA2
		VDAC2
		LMBR1
		LANCL1
		PCNT
		SNX21
		BET1
		SNX17
		N4BP3
		ZNF622
		PCDHB15
		KCNMA1
		GNL3
		ITGA5
		BTG2
		VPS4A
		LRRC41
		ZNF646
		IFT122
		LRRC6
		HOMEZ
		MSL1
		CPXM2
		HS3ST3A1
		MON1B
		CHORDC1
		TRIB3
		ANAPC4
		ZSWIM1
		LOC93622
		KCNK3
		COX15
		KCNK6
		MREG
		AK7
		PDLIM2
		PHYHIP
		COPS7A
		IGSF3
		LRRN1
		SLC25A14
		CACNG5
		UFSP1
		ACTR8
		RABGGTA
		TMEM19
		STX8
		RUNX3
		LUZP1
		EFNB1
		A2M
		GRPEL1
		CCDC66
		PPP1R15B
		TRPM6
		FEV
		SLC8A1
		DGUOK
		LINC01138
		C1QTNF3
		SUPT4H1
		TRAF5
		MFF
		FAM98A
		STAU2
		EXOC3
		RAD23B
		MFSD8
		PODN
		TIAL1
		UFM1
		USP14
		ING5
		HTR7P1
		KIAA1211L
		HSPD1
		N4BP2L2
		B3GNT7
		CCDC43
		OPHN1
		ADH5
		DESI1
		PREP
		CHMP1B
		SYT12
		COPS4
		MAP3K13
		LCMT1
		TJAP1
		RNF139-AS1
		KIAA1324
		PXDN
		A4GALT
		TOMM34
		CD6
		PSMD11
		ZBTB11
		B3GALT5
		SAMM50
		CDC42EP3
		SRP72
		TSPAN7
		MFN2
		ATR
		DDX49
		THAP1
		DPYD
		DOHH
		CROCCP3
		MAPK10
		KDM2A
		MED27
		GLIS2
		NFIL3
		GCA
		CLDN6
		EPHA4
		CENPU
		GPATCH2
		ZNF655
		MRPL15
		RPUSD3
		QRICH1
		MAK16
		TSN
		LZTFL1
		XPC
		GMFB
		AGTPBP1
		STAT5A
		YIPF2
		TRMT6
		PTPRH
		RTCB
		COQ10B
		PSMF1
		NFE2L2
		SH3PXD2A
		OPA3
		TJP3
		MICALL1
		TNFAIP6
		GGN
		CCT4
		RTEL1
		BRD4
		NDUFA13
		MTMR6
		SCAMP3
		SOX9
		UBTD1
		TNRC18
		FAU
		PACSIN3
		SVIL
		PHB2
		NOXA1
		ADCY3
		DLST
		ATP2B2
		NECAB2
		LXN
		EIF3D
		SIX2
		TNFAIP8L3
		RNF7
		SNRPC
		KLHL28
		FAM193A
		PCDHGA10
		LAMTOR3
		EIF2S1
		RBM7
		TERF2
		CD8A
		GTF2H5
		ZBTB8OS
		HBP1
		ARHGAP25
		ZNF710
		ATP6V0A2
		SDHD
		IMPAD1
		PPFIBP1
		BCL7A
		KIAA0753
		FIS1
		PPCDC
		CD83
		GCGR
		BEGAIN
		SLC35B1
		KDM6B
		ANP32A
		MGP
		ACLY
		DNAJC1
		CYP4F12
		MAPK7
		NUDT22
		SYNGR4
		GCH1
		FLI1
		PPDPF
		ECHDC3
		GPRIN2
		ZBTB47
		ZNF681
		HMBOX1
		GPX2
		KMT2B
		RABAC1
		PTPN4
		ITGB2
		ERH
		LOC100506990
		CSRNP1
		SETBP1
		SENP3
		NSUN5
		SF3B5
		VCP
		GPR160
		BGN
		APOBEC3F
		SLC11A1
		RALB
		PCDHGA4
		ATG3
		ADAMTS17
		KLHDC2
		MMP1
		PPP4R1
		GCLC
		SEC61A1
		CDC40
		GTPBP2
		SETD3
		MKKS
		TP53I3
		EBP
		EFR3B
		GPBP1
		ADAMTS12
		PES1
		UCP2
		PABPN1
		ASPN
		KCNH1
		QSOX2
		URB2
		YBX1
		AAAS
		MCF2L-AS1
		MTF2
		FAM3C
		KCNH3
		DBH-AS1
		AP1S3
		GOLGA7B
		ZNF84
		CITED2
		STARD8
		SIAH2
		RMND5A
		ZFAND1
		SPAG5
		F13A1
		ACADM
		DUSP3
		FAM8A1
		ZPR1
		SDSL
		HACL1
		RAD23A
		FAM83B
		GHITM
		BLMH
		MYO9A
		ADCYAP1
		RTN2
[truncated: 1,541 more rows]

## Sheet: DEGS_GF
T1D			T2D			BFA
Dataset 1	Dataset 2	Dataset 3	Dataset 4	Dataset 5	Dataset 6	Dataset 7
A4GALT	ABCC8	A4GALT	A4GALT	AATF	ACSL3	CYB5D1
A4GNT	AGBL4	ABCC8	A4GNT	ABCA5	ADI1	GOSR2
ACSL4	AIG1	ACAP3	ABCC8	ABCA7	AOC3	SLC35E1
ANGEL1	AKT3	ACHE	ACBD3	ACAP3	AREG	ZFPL1
AP1B1	APOB	ACO1	ACHE	ACCS	ARFGAP3	GOLGA3
APOH	ARF5	ACPP	ACPP	ACSL4	ARHGEF11	MAFB
ARAP1	ARL15	ACTR1B	ACTR1A	ADAT1	ASCC3	BSDC1
ARF5	ARL3	AIG1	ADAM10	ADAT2	ATP8B3	MAX
ARHGEF10L	ARSI	AKR7A2	ADAM19	AGPAT4	B4GALNT1	BET1L
B3GALNT2	ARV1	AMIGO2	ADCY3	AGRN	BHLHE40	PNPLA8
B4GALNT4	ATP1A3	ANXA13	ADCY6	AGTRAP	C20orf196	ALKBH5
BACE1	ATP8A1	AP3B1	AGRN	AJUBA	C20orf96	BLZF1
BBS2	B3GALT4	AP3S1	AGRP	ALB	C2orf76	GOLGA5
BCL6	BACE1	AP5B1	AKAP9	AMFR	CDC6	LAPTM4B
C1QTNF3	BAG5	APBA1	AKTIP	ANAPC10	CNTNAP2	COG6
C20orf96	BCL9	ARAP1	AMN	ANK1	COPG1	TMEM104
C3orf67	BEND5	ARF5	ANAPC10	ANKRD28	CREB3	SEC16A
CALML4	C3orf67	ARF6	ANKFY1	AOC3	CREB3L4	ANGPTL2
CCL2	CD36	ARSE	ANKRD49	AP1AR	CTSZ	GPR107
CCNI	CFTR	ARV1	ANXA13	AP1B1	CXCL8	FAM8A1
CEP85	CHRM4	ATL1	AOC3	AP1G2	F2R	GCC2
CLINT1	CHST9	ATP1A1	AP1AR	AP1M2	FADD	SLC35A2
CLU	CLEC14A	ATP1A3	AP3B1	AP1S1	FEZ1	YIF1A
CNGB1	CNGA4	ATP2B3	AP4S1	AP1S3	GALNT15	GORASP2
CNTNAP2	CNTFR	ATP8B1	APBA1	AP3M1	GJB2	STX5
COG2	CPQ	ATXN2	APBA2	AP4E1	GOSR2	COPA
COL1A1	CSPG5	B2M	APH1A	AP5B1	GRAMD3	WIPI1
COPE	CYTH3	B3GALNT1	APOB	APOH	HLA-DPA1	GAK
COQ10A	DCSTAMP	B3GALT2	APOO	APOM	HLA-DRA	CHST11
CRHR1	DCTN3	B3GAT3	ARCN1	APOO	HSPA5	GOLGA2
CTGF	EPHA3	B3GNT2	ARF3	ARCN1	IFT74	SLC30A7
CTSC	F2R	B3GNT8	ARF4	AREG	IGFBP1	ZNF622
CTSZ	FAM21A	B3GNT9	ARF5	ARFGAP1	IGFBP6	GCC1
CXCL8	FAM229B	B4GALNT2	ARFGAP1	ARFGAP3	LIG1	ARL1
CYB5R2	FAM8A1	B4GALNT4	ARFGAP3	ARFIP1	MGAT2	AFTPH
DBNL	FBXL14	B4GALT1	ARFGEF1	ARHGAP4	MKRN2OS	RIN2
DEFB4A	FBXW7	B4GALT5	ARFGEF2	ARHGEF2	MUC20	SART1
DIAPH2	FEM1A	BCL6	ARFIP1	ARHGEF7	NCKAP5	WDR45B
DMKN	FMNL2	BIRC7	ARL3	ARL1	NCSTN	ACBD3
DOCK4	FTH1	BLZF1	ASCC3	ARMCX3	PGAP3	ZNF526
DOPEY2	GABARAPL1	BST2	ASIC4	ARPC2	PIFO	SLC30A5
DPH5	GGA2	BTN3A3	ATAT1	ARSA	PPP1R15A	TMF1
DSEL	GLT8D2	C11orf24	ATG9A	ARSB	R3HDM2	ARFGAP1
DUSP10	GOLGA6C	C14orf80	ATP2A1	ARSI	SEC23B	GBF1
ERI2	GOLGA8G	C1GALT1C1	ATP6V1A	ASCC3	SEC31B	ERICH5
F2R	GOLGA8M	C4orf32	ATP8B1	ASH1L	SEPP1	PPIL6
FAM198B	GZF1	C5orf15	ATP8B3	ASIC1	SLC33A1	RINT1
FEZ1	HACE1	C7orf49	B3GALT5	ASTN1	SPEF2	GOLGA1
FIBIN	HEPACAM2	CACNA1A	B3GAT1	ATAT1	SPIRE1	IMPAD1
FKBP9	HHAT	CACNB3	B3GNT3	ATF6B	STC2	NEO1
FOLR1	HLA-DRA	CALML4	B3GNT4	ATL3	STX6	TBC1D23
FRMD3	HLA-G	CAMKMT	B4GALT2	ATOX1	TPTE2	PLEKHA3
FUT1	HPD	CAPN2	B4GALT5	ATP2C2	VCP	YIPF5
GALNT12	HS6ST1	CASP10	B4GALT7	ATP6V1A	VPS52	LIG1
GALNT4	IER3IP1	CAT	BCAN	ATP8A1	VTI1A	OSBP
GAS1	ING2	CCDC110	BCAP29	ATP8A2	WDR88	RER1
GNRH1	JPH4	CCDC68	BET1	ATP9B	ZCCHC4	COPG1
GOLGA6L9	KCNA5	CCDC71L	BGN	ATR	ZNF526	SYAP1
GOLGA8G	KIAA1324	CCL2	BIRC7	ATXN2		SDE2
GPC3	LAMP1	CCNI2	BMP1	AXIN2		MED8
GRAMD3	LAMP5	CD36	BRSK2	B3GALT5		GOLGB1
HCK	LAMTOR1	CD46	BST2	B3GAT1		ABCC8
HHAT	LARP7	CD47	C11orf73	B3GAT3		B4GALNT3
HKR1	LRRC42	CD68	C17orf75	B3GNT2		DYM
HLA-DQB1	MGAT4C	CD74	C19orf80	B3GNT3		SMAP1
HLA-DRA	MUC12	CD99L2	C1GALT1C1	B3GNT7		PRICKLE2
HLA-DRB5	MVB12B	CEL	C1QA	B4GALT1		GCK
HPD	NCAM1	CERS1	C2orf54	B4GALT4		GLT8D2
ID1	NDFIP1	CFTR	CABP1	B4GALT5		TVP23C-CDRT4
IFT74	NGFR	CHD7	CABP2	B4GALT7		FUT8
IL15RA	NSG1	CHID1	CACNB3	BACE2		MYRIP
IPO5	NTN3	CHPF	CALU	BBS1		MEST
ISLR	NYNRIN	CHST14	CAND1	BEGAIN		COG5
KDELC1	OAZ2	CHST2	CASP10	BICD2		ZC3HAV1
KIAA0319L	OCRL	CHST8	CASQ1	BLOC1S1		YIPF2
KLHL12	PCDHGC4	CHST9	CAT	BLOC1S3		COG3
LACTB2	PCED1B	CIB1	CAV3	BLZF1		RXRA
LDLR	PHF7	CLEC2D	CCDC186	BOK		RAB6A
LIPG	PI4K2A	CLIC5	CCDC91	BROX		TSPAN9
LMTK3	PRKAR2B	CLIP3	CCPG1	C11orf73		GOLPH3
LMX1A	PRKCD	CLSTN1	CD46	C12orf43		NIPA2
LRRC27	PRMT5	CLSTN2	CD74	C1QA		PAQR8
LYN	PROC	CLTA	CD79B	C1QTNF3		YIPF4
MAN1A1	PROS1	CMTM4	CDC123	C20orf96		GOLIM4
MARCO	PRTFDC1	CNIH3	CDC25A	C2orf80		PRKCD
MICB	PSAP	CNTFR	CDH15	C3orf58		COPB1
MIF4GD	PSEN2	COG4	CDK5RAP2	C3orf67		SLC18B1
MPL	RAB12	COL8A2	CHP1	C4orf32		DNAJC5
MPLKIP	RAB1A	COPG2	CHPF	C7orf49		KLF7
MYO1B	RASGRF1	COPZ2	CHPT1	CALN1		HSPB6
NAB1	RGPD3	COQ10A	CHST5	CALU		SLC30A6
NCAM1	RGPD4	CORO6	CLCC1	CAMKMT		ZCCHC4
NCKAP5	RGPD8	CREB3L4	CLCN3	CAND1		CCDC186
NCSTN	RHBDD2	CRYAB	CLIC5	CANT1		PLCXD3
NDST1	RHOBTB3	CRYZ	CLINT1	CAPN2		USP8
NGF	RHOQ	CSF2RB	CLSPN	CAPN8		GCNT4
NMT2	RIMBP2	CTGF	CLTC	CAT		VAMP4
NOD2	RRAGB	CTSC	CLTCL1	CAV2		QPCTL
NSUN6	SCAMP5	CXCL16	CNGB1	CBFA2T3		ZNF527
NTAN1	SCPEP1	CYBRD1	CNIH1	CBLN3		ZNF75D
NXN	SDE2	CYP2U1	CNTNAP2	CCDC25		B2M
OGFRL1	SEC14L5	CYTH3	COG2	CCDC64		ZMYND19
OSBP	SGCE	DCBLD2	COG5	CCDC68		ILVBL
PCDH18	SH3GL2	DCLRE1C	COL16A1	CCDC93		ARFIP2
PDE9A	SIX5	DCTN2	COL7A1	CCL2		ARIH1
PDGFRL	SLC1A5	DEFB4A	COPA	CCNB2		PPP1R15B
PGAP3	SPCS1	DEFB4B	COPB2	CD59		CD59
PLA2G12A	STMN2	DENND5A	COPE	CD74		HGD
PLCG1	SVIP	DHRS11	COPZ1	CDC123		SCG2
PLD2	SYNDIG1L	DHX58	CORO7	CDC25A		CCPG1
PLPP3	SYT15	DNAJC5	CPE	CDC42		TSNAX
PLSCR1	TATDN3	DPH5	CPTP	CDC42EP1		GOLGA4
POLR1D	TBC1D20	DPP7	CREB3L2	CDC6		LAPTM4A
POLR3GL	TIPIN	DPY30	CRHR2	CDIPT		PTPRF
POMT1	TMC6	DSE	CRYZ	CDK13		CCDC146
PPP2R5C	TMEM130	DUSP10	CSGALNACT2	CHEK2		ASCC3
PRELP	TMEM184B	DUSP26	CSNK1A1	CHID1		CNKSR2
PRKAA2	TMEM251	DYNLT1	CSNK2B	CHMP2A		GORAB
PROS1	TMEM59	EFHD1	CSPG4	CHP1		CASC4
PSMG1	TPST1	ELF3	CST3	CHPT1		IGFBP5
RAB20	TRAPPC10	EMID1	CTLA4	CHSY1		TLR5
RARRES1	VAMP4	ENPP7	CTSC	CIB1		CHST2
RHOQ	VMA21	EPHA4	CTSZ	CLCC1		ANKRD40
RNF24	WWOX	ERP44	CUL3	CLTA		USO1
RNPEP	XPA	EVPL	CUL5	CLTC		PDXDC1
RUNX3	ZADH2	EXOC6	CYTH3	CLTCL1		FURIN
SEC24A	ZC3H12B	F2RL1	DAB1	CLVS1		YIF1B
SEPP1	ZDHHC24	F7	DCC	CMTM4		TRIP11
SERTAD1	ZKSCAN2	F8	DCLRE1C	CNIH1		NBAS
SGMS1	ZNF280D	FAM109A	DCSTAMP	CNIH4		FKBP14
SLC11A2	ZNF461	FAM198B	DCTN3	CNST		AMIGO2
SLC39A14	ZNF629	FAM219B	DDHD2	COG4		SLC6A9
SLMAP	ZP3	FAM228B	DEFA4	COL7A1		ARMCX3
SMYD3		FAM78B	DEFA6	COMMD1		DOCK4
SNX17		FEZ1	DENND5A	COPB1		RASSF6
SNX5		FGD1	DHX58	COPE		ARCN1
SPEF2		FGFR3	DIAPH2	CORO6		SACM1L
SPRY4		FGFR4	DLG1	CPQ		FKBP9
ST3GAL1		FIBIN	DLK1	CREB3		MBOAT4
ST3GAL4		FLNA	DNAJC6	CREB3L4		TRAPPC12
ST8SIA2		FMNL2	DNM1L	CSGALNACT1		ZBTB5
STC2		FRMD3	DSE	CSNK1A1		TSHZ2
STX11		FRMD4A	EAPP	CTNNA1		CEP83
STX3		FSTL3	EBAG9	CTNND2		LRRC4
TAF11		FTH1	EEF2	CUBN		PDE4B
TANGO2		FUT1	EFCAB14	CUL3		FEM1A
TAPBP		FUT5	ENPP2	CUL7		BLOC1S3
TCP11L1		FZD5	EPB41	CWF19L1		PWP1
TIAL1		GABARAPL1	EPHA4	CXCL14		EAPP
TMED1		GABRD	EPS15	CXCL8		FAM114A1
TMEM132A		GALK1	ERC1	CYB5R2		VPS54
TMEM133		GALNT11	ERGIC2	CYP2D6		ISLR
TMEM165		GALNT16	ERGIC3	CYP2E1		GLB1
TMEM25		GAS6	ERP44	CYP2U1		STX6
TMEM43		GBP1	EVI5	DBI		MBNL3
TNFAIP2		GBP2	EVPL	DCBLD2		ARFGEF2
TOM1L1		GBP3	EXOC1	DCTN1		NUDT7
TRAF3IP2		GBP4	EXOC2	DDX54		OSBPL9
TRAPPC2		GBP5	F7	DENND2A		ARFGAP3
USF1		GCNT3	FAM20B	DENND4C		CACNB3
VCP		GDI2	FAM3C	DHCR24		SREBF1
VPS35		GJB2	FAM8A1	DHRS12		SLC6A16
WASL		GKAP1	FAR2	DIAPH2		LRRC27
WLS		GLT8D1	FBXL14	DNAJC5		KIAA1211
ZC3H12C		GLT8D2	FCGBP	DNM2		RNF121
ZMPSTE24		GNAS	FES	DPP7		FAM20C
ZNF25		GOLGA8S	FNDC3A	DPY30		TMEM53
ZNF527		GPC1	FRMD4A	DTX3		ERGIC2
ZNF564		GRB14	FURIN	DYM		VGF
		HCK	FUT3	DYNLT1		SLC35C1
		HDAC5	FUT6	E2F3		PDGFRB
		HELLS	FUT7	EDN1		COL18A1
		HEPACAM2	FZD5	EGFR		WDTC1
		HLA-A	GABARAPL2	EI24		CXXC4
		HLA-B	GAD2	ELF3		NAB1
		HLA-C	GAK	EMP2		TMEM214
		HLA-DPA1	GAL3ST4	ENTHD2		TSPAN3
		HLA-DPB1	GALNT12	EPB41		AKAP9
		HLA-DQA1	GCC2	ERI2		BCL6
		HLA-DQA2	GCG	ERP44		FLNB
		HLA-DQB1	GDI2	EXOC1		F5
		HLA-DQB2	GGA3	EXOC5		B4GALT3
		HLA-DRA	GLCE	EXOC6		MVB12B
		HLA-DRB1	GLT8D1	EXOC7		PPT1
		HLA-F	GNAI3	EXT1		MFAP3
		HLA-G	GNAS	F10		CCDC69
		HPS3	GOLGA4	F2		TGFB1
		HS3ST1	GOLGA5	F2RL1		SIPA1L3
		HS3ST3B1	GOLGA7	F7		TM9SF3
		HS6ST1	GOLIM4	FADD		TOM1L2
		HYAL2	GOLPH3	FAM107B		MPZL3
		IFNGR2	GORASP2	FAM114A1		SMIM13
		IFT20	GRAMD3	FAM207A		ZNF532
		IL15	GRIA1	FAM20A		FAM199X
		IL15RA	GSAP	FAM20B		ZMYM5
		IL17RD	HAUS2	FBXL14		RAB20
		IL18	HHAT	FBXO31		GOPC
		ING2	HPD	FBXW7		SPP1
		ISLR	HS2ST1	FCGBP		ADAT2
		JAG1	HSPA12A	FEM1A		TIMP1
		JAKMIP3	HSPD1	FEZ2		YIPF3
		JPH4	HSPG2	FGD1		LYZ
		KCNA5	HTT	FGD2		IGFBP7
		KDELC1	ICA1	FGD6		BGN
		KDELR1	ID1	FGFR2		ARFGEF1
		KIAA1324	IMPAD1	FLNA		LY75
		KIFC3	INS	FLNB		ARHGEF10L
		KRT18	IPO5	FPR1		FMNL3
		LACTB2	ITIH2	FRMD4A		VPS51
		LAMP5	ITM2B	FRMD5		SLC23A2
		LAMTOR1	KDELR2	FSTL3		RASGRF1
		LAP3	KIFAP3	FTH1		PLPP3
		LDLR	KRT2	FTL		TJAP1
		LDLRAD1	LAPTM4A	FUT10		DHRS11
		LFNG	LARP7	FUT11		SMIM5
		LGR5	LAX1	FUT2		SORT1
		LIFR	LCK	FUT3		ARSE
		LIMK2	LGR5	FUT4		GCGR
		LIPG	LMAN1	FUT6		FAM3C
		LITAF	LMAN1L	GAGE1		FAM78B
		LMAN2L	LRBA	GAL3ST2		EXOC3L2
		LYN	LYL1	GAL3ST4		ARFIP1
		MAML2	LYPLA1	GALK2		MGAT2
		MAN1A2	MAMLD1	GALNT1		STX12
		MANSC1	MAN1A1	GALNT14		FCGR2A
		MAP4K2	MAN1A2	GALNT16		SCPEP1
		MATN3	MAN2A1	GALT		ATR
		MDGA1	MANF	GAS8		TVP23B
		MEST	MAP2K1	GBA2		CALHM5
		MFNG	MAP2K7	GCC1		RFC2
		MGAT2	MAP4K2	GCGR		ZNF569
		MGAT5B	MAPK1	GCNT3		DLC1
		MICB	MAPK3	GDF15		CWF19L1
		MIF4GD	MAPK8IP3	GGA3		CALML4
		MLST8	MAPKAP1	GJA1		PCDH18
		MMP11	MAPRE1	GJB2		SNAPIN
		MUC15	MARCO	GKAP1		CD36
		MUC20	MASP2	GLIPR2		GALNT14
		MUC4	MBD1	GLIS3		UBXN6
		MVB12B	MBTPS1	GLYATL1		TANGO6
		MYO1B	MEST	GLYCTK		EI24
		NAPA	MFAP3	GNAI3		DAPK2
		NAPG	MFNG	GNB1		EFCAB14
		NBN	MGAT2	GNB3		ASIC1
		NCOA7	MGAT3	GNPDA1		ST8SIA4
		NDFIP2	MIA3	GNPNAT1		COG2
		NDST3	MICB	GNRH1		CYTH2
		NECAB3	MMP11	GOLGA7		GIPC3
		NKD2	MMP24	GOLGA7B		GLG1
		NMT2	MON2	GOLGA8N		SLC35C2
		NOD2	MSH6	GOLIM4		TMEM87A
		NOVA2	MTOR	GOLT1A		TVP23C
		NRGN	MTUS1	GOLT1B		ZMYND8
		NRTN	MUC6	GOSR1		GTPBP1
		NSG1	MUC7	GOSR2		ASB7
		NTAN1	MVB12B	GPC1		SPRY1
		NUCB1	NAA60	GPC5		BEGAIN
		OGFRL1	NBEA	GPR143		LRIG2
		OPALIN	NBN	GRB2		NCKAP5
		OPTN	NCOA4	GRIA1		FAM210A
		P2RX3	NDFIP1	GSAP		ST6GALNAC4
		P4HB	NDST4	GSKIP		METTL26
		PARP10	NFE2L2	GTF2E1		RPRD1A
		PCED1B	NGFR	GTPBP4		CPEB4
		PCSK9	NIPA2	H1F0		MDGA1
		PDGFC	NOD2	HEPACAM2		DDX31
		PDGFD	NOS3	HERC1		BHLHA15
		PDIA6	NRGN	HKR1		RPGR
		PGAP2	NUCB2	HLA-A		SH3BP5L
		PHF7	OCRL	HLA-DPA1		TTC33
		PITPNB	OMD	HLA-DPB1		SPNS1
		PKDCC	OSBP	HMGB1		ADCY6
		PKMYT1	OSBPL10	HMOX1		SYNGR4
		PLCE1	OSBPL11	HOXB6		INPPL1
		PLCXD3	OSBPL9	HRAS		SMPDL3B
		PLD2	PACS1	HS3ST1		SCOC
		PLSCR1	PAM	HS3ST2		FEZ2
		PODXL2	PANK3	HS3ST3A1		MDFIC
		POMT1	PAQR3	HS6ST2		CCNI
		PPP1R1C	PARK2	HSPA12A		GBP4
		PRKD2	PAX2	HSPB8		PCED1B
		PROC	PCSK6	ID1		PI4KB
		PROM1	PDCD10	IFT20		ZNF576
		PRRG4	PDE9A	IGFBP6		MAP2K7
		PRTFDC1	PDGFB	IGFBP7		WWC1
		PRX	PDGFRL	IL13RA1		NXN
		PSMD11	PDIA6	IL15RA		CD99
		PTP4A2	PEX5	IMPAD1		MSH6
		RAB19	PIK3C2A	INMT		TP53I11
		RAB20	PIKFYVE	INPP5E		APBA1
		RAB2B	PJA2	INSIG2		ITIH5
		RAB33A	PLA2G5	ITGA5		TRRAP
		RAB37	PLAGL1	JAG1		SELENOP
		RANGRF	PLCB3	KBTBD8		DHRS12
		RAP1GAP	PLCG1	KDELC1		KIAA1755
		RARRES1	PLD1	KDELR2		C3orf67
		RASGEF1A	PLD2	KIAA0141		PSMD6
		RASGRF1	PLK3	KIAA0319L		MPPE1
		RASIP1	PMEPA1	KIAA1324		MAN1A1
		RASSF9	PMF1	KIAA2013		STX8
		RBM20	PNRC2	KIF1C		MGAT4A
		RCBTB2	POLQ	KIF3B		AP1AR
		RND3	POLR1D	KIFC3		CCDC68
		RNF157	PPIL6	KLC1		GALNT10
		RNF182	PPP2R3C	KLF5		MARF1
		RNF214	PPP2R5C	KLHL12		HMOX1
		RNF24	PPP6R1	KRBOX1		SMAD6
		RNPEP	PPT1	KRT18		ARL15
		RP2	PRDM2	LACTB2		AP3B1
		RSAD2	PREB	LAMTOR1		ANAPC10
		RTN3	PREPL	LAP3		SULT1B1
		RUNX3	PRKAR2A	LARGE		ZDHHC9
		SCFD1	PRKG1	LARP7		RIOK3
		SCOC	PRMT5	LASP1		FUT11
		SCYL3	PROZ	LCK		HDAC3
		SDC1	PRX	LDLR		PDGFD
		SDC2	PSENEN	LHFPL4		PCOLCE
		SEC11A	PSMB3	LIG1		TMEM196
		SEC11C	PSMD11	LIMK1		BROX
		SEC14L5	PSMD6	LMAN1		NPTX2
		SECTM1	PSMG1	LMAN2		EXT2
		SEPP1	RAB14	LRIG2		CCNI2
		SERTAD1	RAB1A	LRRK2		CTNND2
		SGMS1	RAB21	LST1		RBP5
		SH3D19	RAB2A	LUM		HLA-A
		SLA2	RAB30	LYN		B3GNT9
		SLC11A2	RAB6B	LYPLA1		BIRC6
		SLC18B1	RABAC1	LZTR1		ST8SIA3
		SLC23A2	RAF1	MALL		PARP10
		SLC29A3	RAPSN	MAN2A1		RCBTB2
		SLC30A5	RARRES1	MAP2K1		ZNF496
		SLC30A7	RCBTB2	MAPK1		ABCC4
		SLC35B2	RHEB	MAPK8IP3		NNMT
		SLC35D1	RHOBTB3	MAPKAP1		EMC9
		SLC39A14	RIOK3	MAPRE1		POSTN
		SLC9A8	RNF122	MARCH11		CDC25A
		SLITRK5	RNF13	MDFIC		ARSA
		SNCB	RNF139	METTL15		WSCD1
		SNCG	ROCK1	MFAP3		NCOA7
		SNX2	RPH3A	MGAT2		SIGLEC15
		SNX5	RRAGA	MGAT5		C1QTNF3
		SNX6	RTN3	MICAL2		RIPOR1
		SORL1	RUNX3	MMD		SEC11C
		SORT1	SACM1L	MMD2		TM9SF1
		SOX7	SAR1A	MMEL1		GGA1
		SPATA16	SAR1B	MMGT1		ENTPD6
		SPPL2A	SCAMP1	MMP14		ZNF287
		SRGN	SCAMP3	MOB4		ZADH2
		ST3GAL2	SCAMP4	MON2		NETO2
		ST3GAL5	SCFD1	MPHOSPH9		GALNT2
		ST6GAL2	SCPEP1	MPZL3		ESD
		ST6GALNAC6	SDC2	MSH6		ZNRF3
		ST8SIA3	SEC11A	MUC1		NUCB2
		STEAP4	SEC13	MUC12		HID1
		STK16	SEC14L1	MUC13		QSOX2
		STS	SEC14L4	MUC20		NUDT18
		STX10	SEC22B	MYO1B		RGL1
		STX11	SEC23B	MYO5A		FAM174A
		SULT1B1	SEC23IP	MYO6		ZFAND4
		SURF4	SEC24B	NAB1		SLC36A4
		SYNGR4	SEC24D	NAPG		GALNT3
		SYT17	SECTM1	NAPRT		GNB3
		TAPBP	SERPINB10	NCAM1		HDAC5
		TAPBPL	SGCE	NCAN		GFRA1
		THEMIS2	SGMS1	NCKAP5		NIPAL1
		TLR3	SH3GL2	NCOA4		CLEC14A
		TLR8	SH3GLB1	NCSTN		OTUD1
		TMC8	SIPA1	NDFIP2		USP53
		TMED3	SIX5	NDST4		PODXL2
		TMEM130	SLC11A2	NEDD9		RFX2
		TMEM165	SLC1A6	NEO1		RBM20
		TMEM241	SLC30A1	NFE2L2		MAPK4
		TMEM25	SLC35A1	NFKBIE		TMEM74B
		TMEM80	SLC35A3	NIPA2		PSMG1
		TNFAIP2	SLC35A5	NPC1		PLSCR1
		TPD52	SLC35E1	NPC1L1		COPE
		TPST2	SLC35G2	NRAS		KDELR1
		TRAF3IP2	SLC39A14	NRTN		ALB
		TRAPPC2L	SLC39A7	NSUN6		WDR44
		TRAPPC6A	SLC9A7	OBSL1		GCNT3
		TRIM21	SLC9A8	OCRL		GNPDA1
		TRIM55	SLPI	OGFRL1		ATP7B
		TRIM69	SMAP1	OGN		AMFR
		TSC22D3	SMO	OPTN		VWA5B2
		TYMP	SNCB	OSBP		ARL2
		UBE2O	SNX17	PAM		MICAL2
		UGGT1	SNX2	PAQR3		RASSF2
		UGGT2	SOD3	PARP10		CCNJ
		UGT3A2	SPAG9	PCDH10		DNMBP
		UNC45A	SPCS1	PCNT		DNM3
		USE1	SPG21	PDCD10		FAM207A
		USF1	SPTBN5	PGAP2		GPR108
		VAMP5	SRCAP	PGAP3		NOVA2
		VPS13C	ST3GAL4	PHF7		TAF11
		VPS26B	ST3GAL6	PI4K2A		NYNRIN
		VTI1B	ST8SIA2	PICALM		IFNGR2
		WDR41	ST8SIA5	PIDD1		ZNF461
		WHAMM	STAM	PIEZO1		VTI1B
		WLS	STMN2	PIGQ		ACCS
		WNT5A	STX16	PITPNB		SLC35A5
		WNT5B	STX18	PITPNM1		SEC14L5
		WNT7A	STX3	PJA2		CSF2RB
		WSCD1	SULT1B1	PKDCC		ZNF326
		ZADH2	SYBU	PLA2G4A		PEX5
		ZC3H12B	SYDE1	PLCG1		AOC3
		ZC3HAV1	SYTL2	PLEKHA3		MASP2
		ZDHHC1	TAF7	PLEKHM2		HABP4
		ZDHHC13	TAS2R16	POFUT2		HYI
		ZMYND19	TCP11L1	POLL		S1PR2
		ZNF148	TEX261	POLR1D		FBXL8
			TG	POMT1		KCTD15
			TGFB1	PPIL2		CAND1
			TJAP1	PPIL6		ARL4D
			TMC6	PPP1R15A		LHFPL4
			TMED1	PPP1R15B		SYTL2
			TMED10	PPP2R5C		GDF15
			TMED2	PPP6R1		CYP2U1
			TMED3	PRICKLE2		TMEM147
			TMED5	PRKAR2A		NTAN1
			TMEM104	PRKCD		HOXB6
			TMEM165	PRKG1		ENPP2
			TMEM180	PRMT5		LDLRAD1
			TMEM251	PROC		TMEM176B
			TMEM30A	PROM1		KCNF1
			TMEM59	PSENEN		MVB12A
			TMEM59L	PSMB3		CCL2
			TNFSF9	PSMB6		CYBRD1
			TNKS	PSMD11		ZC3H12C
			TNNT1	PSMD6		COLEC12
			TOM1L1	PSMG1		CTSL
			TOPBP1	PTBP3		NCKAP5L
			TP53I11	PTCH1		C4orf33
			TP63	PTGDS		ZBED9
			TP73	PTHLH		COL16A1
			TPD52	PTP4A2		HELLS
			TRAPPC9	PWP1		ZNF18
			TSNAX	QSOX2		ARSI
			TSPYL5	R3HDM2		TGOLN2
			TTC33	RAB10		LAT
			TTR	RAB11A		ARHGAP32
			TVP23B	RAB11FIP1		CD74
			TXNDC15	RAB11FIP5		GBA2
			TYR	RAB14		PSMD11
			UBXN2B	RAB1A		FAM20B
			UNC50	RAB21		PDE8A
			UNC93B1	RAB26		SYNGR2
			USO1	RAB27B		CPQ
			VAMP3	RAB29		LYN
			VAMP5	RAB30		PDE4DIP
			VAMP7	RAB31		SPATA6
			VPS13C	RAB32		ITM2B
			VPS26A	RAB38		PROSER3
			VPS53	RAB7B		PIP4K2A
			VPS54	RAB8A		CDR1
			WDR44	RAB9A		PTGS1
			WNT1	RABGAP1L		SLC24A3
			WNT7B	RANGRF		HHAT
			WWP1	RAPSN		SRGN
			XPNPEP2	RASGEF1A		NMT2
			YIF1A	RASGRP3		COMP
			YIPF2	RFC2		CHI3L1
			YIPF6	RFNG		SPCS1
			YWHAZ	RFX2		SLC39A14
			ZBED5	RGS20		SAXO2
			ZC3H3	RHEB		JAG1
			ZCWPW1	RHOF		TMEM132E
			ZDHHC4	RIC3		TSPAN31
			ZDHHC6	RIN2		RARRES1
			ZNF287	RITA1		JAM3
			ZNF576	RND3		MANSC1
			ZNF629	RNF121		CLEC2D
			ZP2	RNF126		C17orf75
				RNF139		ZMPSTE24
				RP2		RASGEF1A
				RPGR		NADSYN1
				RPH3A		NOD2
				RRAD		TLR4
				RRAGA		CGREF1
				RSAD2		RRAGA
				RTN3		GDPD5
				RUSC1		C9orf64
				RUVBL1		TMEM80
				RXRA		DPH5
				RYR1		GRAMD2B
				SCAMP2		LRRC8C
				SCAMP3		ZC3H12B
				SCOC		TRAPPC3
				SCYL2		TBC1D5
				SDC4		TSLP
				SDE2		POF1B
				SEC13		FAM229B
				SEC16B		TMEM123
				SEC23B		CMTM4
				SEC23IP		OAZ2
				SEC31B		PSEN1
				SERINC3		TMEM41A
				SERPINB2		TRAF3IP2
				SERTAD1		CEP85
				SGMS2		PCSK5
				SGSM3		CASP10
				SH3GLB1		APP
				SIPA1L2		TMBIM4
				SLC1A5		ANO9
				SLC26A11
				SLC2A1
				SLC30A1
				SLC30A5
				SLC30A6
				SLC30A7
				SLC33A1
				SLC35A1
				SLC35A2
				SLC35A4
				SLC35B4
				SLC35C1
				SLC35E1
				SLC35G2
				SLC38A10
				SLC39A13
				SLC6A16
				SLC6A4
				SLC9A3R1
				SLC9A7
				SLMAP
				SMAP1
				SMIM13
				SNAP29
				SNX1
				SNX2
				SNX31
				SNX5
				SNX6
				SNX9
				SOD3
				SPATA16
				SPIRE1
				SPPL2A
				SPPL2B
				SPTBN1
				SRGN
				ST3GAL1
				ST8SIA1
				STARD9
				STIP1
				STK11
				STMN4
				STS
				STX16
				STX3
				STX6
				STX8
				SUN3
				SVIP
				SYAP1
				SYNDIG1L
				SYNE1
				SYNGR4
				SYT17
				TAPBP
				TBC1D10C
				TBC1D5
				TCP11L1
				TCTN2
				TENM2
				TERF2
				TFG
				TGFA
				TGFBI
				TGOLN2
				THEMIS2
				TIAL1
				TIPARP
				TIPIN
				TJAP1
				TLR5
				TLR8
				TM9SF1
				TMC8
				TMCO1
				TMED5
				TMEM104
				TMEM127
				TMEM130
				TMEM132A
				TMEM181
				TMEM214
				TMEM241
				TMEM41A
				TMEM43
				TMEM59L
				TMEM80
				TMEM87B
				TMF1
				TNRC6A
				TOM1L2
				TP73
				TRAPPC1
				TRAPPC2L
				TRIM69
				TRIP11
				TSC2
				TSR3
				TVP23A
				TXNDC15
				UBAC1
				UBAP1
				UBIAD1
				UGCG
				UHMK1
				USE1
				UXS1
				VAC14
				VAMP3
				VAMP4
				VAMP7
				VAMP8
				VCP
				VCPIP1
				VMA21
				VPS13A
				VPS26A
				VPS45
				VPS52
				VTI1A
				VTI1B
				WASL
				WDR41
				WHAMM
				WNT10B
				WNT7A
				XRN1
				YES1
				YIF1B
				YIPF5
				YIPF6
				YKT6
				YWHAZ
				ZBED9
				ZC3HAV1
				ZCCHC4
				ZDHHC12
				ZDHHC21
				ZDHHC3
				ZDHHC4
				ZDHHC8
				ZMPSTE24
				ZMYND8
				ZNF576
				ZNF622
				ZP1
				ZW10

## Sheet: DEGs_GF_Combined
T1D	T2D	BFA
A4GALT	A4GALT	CYB5D1
A4GNT	A4GNT	GOSR2
ACSL4	ABCC8	SLC35E1
ANGEL1	ACBD3	ZFPL1
AP1B1	ACHE	GOLGA3
APOH	ACPP	MAFB
ARAP1	ACTR1A	BSDC1
ARF5	ADAM10	MAX
ARHGEF10L	ADAM19	BET1L
B3GALNT2	ADCY3	PNPLA8
B4GALNT4	ADCY6	ALKBH5
BACE1	AGRN	BLZF1
BBS2	AGRP	GOLGA5
BCL6	AKAP9	LAPTM4B
C1QTNF3	AKTIP	COG6
C20orf96	AMN	TMEM104
C3orf67	ANAPC10	SEC16A
CALML4	ANKFY1	ANGPTL2
CCL2	ANKRD49	GPR107
CCNI	ANXA13	FAM8A1
CEP85	AOC3	GCC2
CLINT1	AP1AR	SLC35A2
CLU	AP3B1	YIF1A
CNGB1	AP4S1	GORASP2
CNTNAP2	APBA1	STX5
COG2	APBA2	COPA
COL1A1	APH1A	WIPI1
COPE	APOB	GAK
COQ10A	APOO	CHST11
CRHR1	ARCN1	GOLGA2
CTGF	ARF3	SLC30A7
CTSC	ARF4	ZNF622
CTSZ	ARF5	GCC1
CXCL8	ARFGAP1	ARL1
CYB5R2	ARFGAP3	AFTPH
DBNL	ARFGEF1	RIN2
DEFB4A	ARFGEF2	SART1
DIAPH2	ARFIP1	WDR45B
DMKN	ARL3	ACBD3
DOCK4	ASCC3	ZNF526
DOPEY2	ASIC4	SLC30A5
DPH5	ATAT1	TMF1
DSEL	ATG9A	ARFGAP1
DUSP10	ATP2A1	GBF1
ERI2	ATP6V1A	ERICH5
F2R	ATP8B1	PPIL6
FAM198B	ATP8B3	RINT1
FEZ1	B3GALT5	GOLGA1
FIBIN	B3GAT1	IMPAD1
FKBP9	B3GNT3	NEO1
FOLR1	B3GNT4	TBC1D23
FRMD3	B4GALT2	PLEKHA3
FUT1	B4GALT5	YIPF5
GALNT12	B4GALT7	LIG1
GALNT4	BCAN	OSBP
GAS1	BCAP29	RER1
GNRH1	BET1	COPG1
GOLGA6L9	BGN	SYAP1
GOLGA8G	BIRC7	SDE2
GPC3	BMP1	MED8
GRAMD3	BRSK2	GOLGB1
HCK	BST2	ABCC8
HHAT	C11orf73	B4GALNT3
HKR1	C17orf75	DYM
HLA-DQB1	C19orf80	SMAP1
HLA-DRA	C1GALT1C1	PRICKLE2
HLA-DRB5	C1QA	GCK
HPD	C2orf54	GLT8D2
ID1	CABP1	TVP23C-CDRT4
IFT74	CABP2	FUT8
IL15RA	CACNB3	MYRIP
IPO5	CALU	MEST
ISLR	CAND1	COG5
KDELC1	CASP10	ZC3HAV1
KIAA0319L	CASQ1	YIPF2
KLHL12	CAT	COG3
LACTB2	CAV3	RXRA
LDLR	CCDC186	RAB6A
LIPG	CCDC91	TSPAN9
LMTK3	CCPG1	GOLPH3
LMX1A	CD46	NIPA2
LRRC27	CD74	PAQR8
LYN	CD79B	YIPF4
MAN1A1	CDC123	GOLIM4
MARCO	CDC25A	PRKCD
MICB	CDH15	COPB1
MIF4GD	CDK5RAP2	SLC18B1
MPL	CHP1	DNAJC5
MPLKIP	CHPF	KLF7
MYO1B	CHPT1	HSPB6
NAB1	CHST5	SLC30A6
NCAM1	CLCC1	ZCCHC4
NCKAP5	CLCN3	CCDC186
NCSTN	CLIC5	PLCXD3
NDST1	CLINT1	USP8
NGF	CLSPN	GCNT4
NMT2	CLTC	VAMP4
NOD2	CLTCL1	QPCTL
NSUN6	CNGB1	ZNF527
NTAN1	CNIH1	ZNF75D
NXN	CNTNAP2	B2M
OGFRL1	COG2	ZMYND19
OSBP	COG5	ILVBL
PCDH18	COL16A1	ARFIP2
PDE9A	COL7A1	ARIH1
PDGFRL	COPA	PPP1R15B
PGAP3	COPB2	CD59
PLA2G12A	COPE	HGD
PLCG1	COPZ1	SCG2
PLD2	CORO7	CCPG1
PLPP3	CPE	TSNAX
PLSCR1	CPTP	GOLGA4
POLR1D	CREB3L2	LAPTM4A
POLR3GL	CRHR2	PTPRF
POMT1	CRYZ	CCDC146
PPP2R5C	CSGALNACT2	ASCC3
PRELP	CSNK1A1	CNKSR2
PRKAA2	CSNK2B	GORAB
PROS1	CSPG4	CASC4
PSMG1	CST3	IGFBP5
RAB20	CTLA4	TLR5
RARRES1	CTSC	CHST2
RHOQ	CTSZ	ANKRD40
RNF24	CUL3	USO1
RNPEP	CUL5	PDXDC1
RUNX3	CYTH3	FURIN
SEC24A	DAB1	YIF1B
SEPP1	DCC	TRIP11
SERTAD1	DCLRE1C	NBAS
SGMS1	DCSTAMP	FKBP14
SLC11A2	DCTN3	AMIGO2
SLC39A14	DDHD2	SLC6A9
SLMAP	DEFA4	ARMCX3
SMYD3	DEFA6	DOCK4
SNX17	DENND5A	RASSF6
SNX5	DHX58	ARCN1
SPEF2	DIAPH2	SACM1L
SPRY4	DLG1	FKBP9
ST3GAL1	DLK1	MBOAT4
ST3GAL4	DNAJC6	TRAPPC12
ST8SIA2	DNM1L	ZBTB5
STC2	DSE	TSHZ2
STX11	EAPP	CEP83
STX3	EBAG9	LRRC4
TAF11	EEF2	PDE4B
TANGO2	EFCAB14	FEM1A
TAPBP	ENPP2	BLOC1S3
TCP11L1	EPB41	PWP1
TIAL1	EPHA4	EAPP
TMED1	EPS15	FAM114A1
TMEM132A	ERC1	VPS54
TMEM133	ERGIC2	ISLR
TMEM165	ERGIC3	GLB1
TMEM25	ERP44	STX6
TMEM43	EVI5	MBNL3
TNFAIP2	EVPL	ARFGEF2
TOM1L1	EXOC1	NUDT7
TRAF3IP2	EXOC2	OSBPL9
TRAPPC2	F7	ARFGAP3
USF1	FAM20B	CACNB3
VCP	FAM3C	SREBF1
VPS35	FAM8A1	SLC6A16
WASL	FAR2	LRRC27
WLS	FBXL14	KIAA1211
ZC3H12C	FCGBP	RNF121
ZMPSTE24	FES	FAM20C
ZNF25	FNDC3A	TMEM53
ZNF527	FRMD4A	ERGIC2
ZNF564	FURIN	VGF
ABCC8	FUT3	SLC35C1
AGBL4	FUT6	PDGFRB
AIG1	FUT7	COL18A1
AKT3	FZD5	WDTC1
APOB	GABARAPL2	CXXC4
ARF5	GAD2	NAB1
ARL15	GAK	TMEM214
ARL3	GAL3ST4	TSPAN3
ARSI	GALNT12	AKAP9
ARV1	GCC2	BCL6
ATP1A3	GCG	FLNB
ATP8A1	GDI2	F5
B3GALT4	GGA3	B4GALT3
BACE1	GLCE	MVB12B
BAG5	GLT8D1	PPT1
BCL9	GNAI3	MFAP3
BEND5	GNAS	CCDC69
C3orf67	GOLGA4	TGFB1
CD36	GOLGA5	SIPA1L3
CFTR	GOLGA7	TM9SF3
CHRM4	GOLIM4	TOM1L2
CHST9	GOLPH3	MPZL3
CLEC14A	GORASP2	SMIM13
CNGA4	GRAMD3	ZNF532
CNTFR	GRIA1	FAM199X
CPQ	GSAP	ZMYM5
CSPG5	HAUS2	RAB20
CYTH3	HHAT	GOPC
DCSTAMP	HPD	SPP1
DCTN3	HS2ST1	ADAT2
EPHA3	HSPA12A	TIMP1
F2R	HSPD1	YIPF3
FAM21A	HSPG2	LYZ
FAM229B	HTT	IGFBP7
FAM8A1	ICA1	BGN
FBXL14	ID1	ARFGEF1
FBXW7	IMPAD1	LY75
FEM1A	INS	ARHGEF10L
FMNL2	IPO5	FMNL3
FTH1	ITIH2	VPS51
GABARAPL1	ITM2B	SLC23A2
GGA2	KDELR2	RASGRF1
GLT8D2	KIFAP3	PLPP3
GOLGA6C	KRT2	TJAP1
GOLGA8G	LAPTM4A	DHRS11
GOLGA8M	LARP7	SMIM5
GZF1	LAX1	SORT1
HACE1	LCK	ARSE
HEPACAM2	LGR5	GCGR
HHAT	LMAN1	FAM3C
HLA-DRA	LMAN1L	FAM78B
HLA-G	LRBA	EXOC3L2
HPD	LYL1	ARFIP1
HS6ST1	LYPLA1	MGAT2
IER3IP1	MAMLD1	STX12
ING2	MAN1A1	FCGR2A
JPH4	MAN1A2	SCPEP1
KCNA5	MAN2A1	ATR
KIAA1324	MANF	TVP23B
LAMP1	MAP2K1	CALHM5
LAMP5	MAP2K7	RFC2
LAMTOR1	MAP4K2	ZNF569
LARP7	MAPK1	DLC1
LRRC42	MAPK3	CWF19L1
MGAT4C	MAPK8IP3	CALML4
MUC12	MAPKAP1	PCDH18
MVB12B	MAPRE1	SNAPIN
NCAM1	MARCO	CD36
NDFIP1	MASP2	GALNT14
NGFR	MBD1	UBXN6
NSG1	MBTPS1	TANGO6
NTN3	MEST	EI24
NYNRIN	MFAP3	DAPK2
OAZ2	MFNG	EFCAB14
OCRL	MGAT2	ASIC1
PCDHGC4	MGAT3	ST8SIA4
PCED1B	MIA3	COG2
PHF7	MICB	CYTH2
PI4K2A	MMP11	GIPC3
PRKAR2B	MMP24	GLG1
PRKCD	MON2	SLC35C2
PRMT5	MSH6	TMEM87A
PROC	MTOR	TVP23C
PROS1	MTUS1	ZMYND8
PRTFDC1	MUC6	GTPBP1
PSAP	MUC7	ASB7
PSEN2	MVB12B	SPRY1
RAB12	NAA60	BEGAIN
RAB1A	NBEA	LRIG2
RASGRF1	NBN	NCKAP5
RGPD3	NCOA4	FAM210A
RGPD4	NDFIP1	ST6GALNAC4
RGPD8	NDST4	METTL26
RHBDD2	NFE2L2	RPRD1A
RHOBTB3	NGFR	CPEB4
RHOQ	NIPA2	MDGA1
RIMBP2	NOD2	DDX31
RRAGB	NOS3	BHLHA15
SCAMP5	NRGN	RPGR
SCPEP1	NUCB2	SH3BP5L
SDE2	OCRL	TTC33
SEC14L5	OMD	SPNS1
SGCE	OSBP	ADCY6
SH3GL2	OSBPL10	SYNGR4
SIX5	OSBPL11	INPPL1
SLC1A5	OSBPL9	SMPDL3B
SPCS1	PACS1	SCOC
STMN2	PAM	FEZ2
SVIP	PANK3	MDFIC
SYNDIG1L	PAQR3	CCNI
SYT15	PARK2	GBP4
TATDN3	PAX2	PCED1B
TBC1D20	PCSK6	PI4KB
TIPIN	PDCD10	ZNF576
TMC6	PDE9A	MAP2K7
TMEM130	PDGFB	WWC1
TMEM184B	PDGFRL	NXN
TMEM251	PDIA6	CD99
TMEM59	PEX5	MSH6
TPST1	PIK3C2A	TP53I11
TRAPPC10	PIKFYVE	APBA1
VAMP4	PJA2	ITIH5
VMA21	PLA2G5	TRRAP
WWOX	PLAGL1	SELENOP
XPA	PLCB3	DHRS12
ZADH2	PLCG1	KIAA1755
ZC3H12B	PLD1	C3orf67
ZDHHC24	PLD2	PSMD6
ZKSCAN2	PLK3	MPPE1
ZNF280D	PMEPA1	MAN1A1
ZNF461	PMF1	STX8
ZNF629	PNRC2	MGAT4A
ZP3	POLQ	AP1AR
A4GALT	POLR1D	CCDC68
ABCC8	PPIL6	GALNT10
ACAP3	PPP2R3C	MARF1
ACHE	PPP2R5C	HMOX1
ACO1	PPP6R1	SMAD6
ACPP	PPT1	ARL15
ACTR1B	PRDM2	AP3B1
AIG1	PREB	ANAPC10
AKR7A2	PREPL	SULT1B1
AMIGO2	PRKAR2A	ZDHHC9
ANXA13	PRKG1	RIOK3
AP3B1	PRMT5	FUT11
AP3S1	PROZ	HDAC3
AP5B1	PRX	PDGFD
APBA1	PSENEN	PCOLCE
ARAP1	PSMB3	TMEM196
ARF5	PSMD11	BROX
ARF6	PSMD6	NPTX2
ARSE	PSMG1	EXT2
ARV1	RAB14	CCNI2
ATL1	RAB1A	CTNND2
ATP1A1	RAB21	RBP5
ATP1A3	RAB2A	HLA-A
ATP2B3	RAB30	B3GNT9
ATP8B1	RAB6B	BIRC6
ATXN2	RABAC1	ST8SIA3
B2M	RAF1	PARP10
B3GALNT1	RAPSN	RCBTB2
B3GALT2	RARRES1	ZNF496
B3GAT3	RCBTB2	ABCC4
B3GNT2	RHEB	NNMT
B3GNT8	RHOBTB3	EMC9
B3GNT9	RIOK3	POSTN
B4GALNT2	RNF122	CDC25A
B4GALNT4	RNF13	ARSA
B4GALT1	RNF139	WSCD1
B4GALT5	ROCK1	NCOA7
BCL6	RPH3A	SIGLEC15
BIRC7	RRAGA	C1QTNF3
BLZF1	RTN3	RIPOR1
BST2	RUNX3	SEC11C
BTN3A3	SACM1L	TM9SF1
C11orf24	SAR1A	GGA1
C14orf80	SAR1B	ENTPD6
C1GALT1C1	SCAMP1	ZNF287
C4orf32	SCAMP3	ZADH2
C5orf15	SCAMP4	NETO2
C7orf49	SCFD1	GALNT2
CACNA1A	SCPEP1	ESD
CACNB3	SDC2	ZNRF3
CALML4	SEC11A	NUCB2
CAMKMT	SEC13	HID1
CAPN2	SEC14L1	QSOX2
CASP10	SEC14L4	NUDT18
CAT	SEC22B	RGL1
CCDC110	SEC23B	FAM174A
CCDC68	SEC23IP	ZFAND4
CCDC71L	SEC24B	SLC36A4
CCL2	SEC24D	GALNT3
CCNI2	SECTM1	GNB3
CD36	SERPINB10	HDAC5
CD46	SGCE	GFRA1
CD47	SGMS1	NIPAL1
CD68	SH3GL2	CLEC14A
CD74	SH3GLB1	OTUD1
CD99L2	SIPA1	USP53
CEL	SIX5	PODXL2
CERS1	SLC11A2	RFX2
CFTR	SLC1A6	RBM20
CHD7	SLC30A1	MAPK4
CHID1	SLC35A1	TMEM74B
CHPF	SLC35A3	PSMG1
CHST14	SLC35A5	PLSCR1
CHST2	SLC35E1	COPE
CHST8	SLC35G2	KDELR1
CHST9	SLC39A14	ALB
CIB1	SLC39A7	WDR44
CLEC2D	SLC9A7	GCNT3
CLIC5	SLC9A8	GNPDA1
CLIP3	SLPI	ATP7B
CLSTN1	SMAP1	AMFR
CLSTN2	SMO	VWA5B2
CLTA	SNCB	ARL2
CMTM4	SNX17	MICAL2
CNIH3	SNX2	RASSF2
CNTFR	SOD3	CCNJ
COG4	SPAG9	DNMBP
COL8A2	SPCS1	DNM3
COPG2	SPG21	FAM207A
COPZ2	SPTBN5	GPR108
COQ10A	SRCAP	NOVA2
CORO6	ST3GAL4	TAF11
CREB3L4	ST3GAL6	NYNRIN
CRYAB	ST8SIA2	IFNGR2
CRYZ	ST8SIA5	ZNF461
CSF2RB	STAM	VTI1B
CTGF	STMN2	ACCS
CTSC	STX16	SLC35A5
CXCL16	STX18	SEC14L5
CYBRD1	STX3	CSF2RB
CYP2U1	SULT1B1	ZNF326
CYTH3	SYBU	PEX5
DCBLD2	SYDE1	AOC3
DCLRE1C	SYTL2	MASP2
DCTN2	TAF7	HABP4
DEFB4A	TAS2R16	HYI
DEFB4B	TCP11L1	S1PR2
DENND5A	TEX261	FBXL8
DHRS11	TG	KCTD15
DHX58	TGFB1	CAND1
DNAJC5	TJAP1	ARL4D
DPH5	TMC6	LHFPL4
DPP7	TMED1	SYTL2
DPY30	TMED10	GDF15
DSE	TMED2	CYP2U1
DUSP10	TMED3	TMEM147
DUSP26	TMED5	NTAN1
DYNLT1	TMEM104	HOXB6
EFHD1	TMEM165	ENPP2
ELF3	TMEM180	LDLRAD1
EMID1	TMEM251	TMEM176B
ENPP7	TMEM30A	KCNF1
EPHA4	TMEM59	MVB12A
ERP44	TMEM59L	CCL2
EVPL	TNFSF9	CYBRD1
EXOC6	TNKS	ZC3H12C
F2RL1	TNNT1	COLEC12
F7	TOM1L1	CTSL
F8	TOPBP1	NCKAP5L
FAM109A	TP53I11	C4orf33
FAM198B	TP63	ZBED9
FAM219B	TP73	COL16A1
FAM228B	TPD52	HELLS
FAM78B	TRAPPC9	ZNF18
FEZ1	TSNAX	ARSI
FGD1	TSPYL5	TGOLN2
FGFR3	TTC33	LAT
FGFR4	TTR	ARHGAP32
FIBIN	TVP23B	CD74
FLNA	TXNDC15	GBA2
FMNL2	TYR	PSMD11
FRMD3	UBXN2B	FAM20B
FRMD4A	UNC50	PDE8A
FSTL3	UNC93B1	SYNGR2
FTH1	USO1	CPQ
FUT1	VAMP3	LYN
FUT5	VAMP5	PDE4DIP
FZD5	VAMP7	SPATA6
GABARAPL1	VPS13C	ITM2B
GABRD	VPS26A	PROSER3
GALK1	VPS53	PIP4K2A
GALNT11	VPS54	CDR1
GALNT16	WDR44	PTGS1
GAS6	WNT1	SLC24A3
GBP1	WNT7B	HHAT
GBP2	WWP1	SRGN
GBP3	XPNPEP2	NMT2
GBP4	YIF1A	COMP
GBP5	YIPF2	CHI3L1
GCNT3	YIPF6	SPCS1
GDI2	YWHAZ	SLC39A14
GJB2	ZBED5	SAXO2
GKAP1	ZC3H3	JAG1
GLT8D1	ZCWPW1	TMEM132E
GLT8D2	ZDHHC4	TSPAN31
GNAS	ZDHHC6	RARRES1
GOLGA8S	ZNF287	JAM3
GPC1	ZNF576	MANSC1
GRB14	ZNF629	CLEC2D
HCK	ZP2	C17orf75
HDAC5	AATF	ZMPSTE24
HELLS	ABCA5	RASGEF1A
HEPACAM2	ABCA7	NADSYN1
HLA-A	ACAP3	NOD2
HLA-B	ACCS	TLR4
HLA-C	ACSL4	CGREF1
HLA-DPA1	ADAT1	RRAGA
HLA-DPB1	ADAT2	GDPD5
HLA-DQA1	AGPAT4	C9orf64
HLA-DQA2	AGRN	TMEM80
HLA-DQB1	AGTRAP	DPH5
HLA-DQB2	AJUBA	GRAMD2B
HLA-DRA	ALB	LRRC8C
HLA-DRB1	AMFR	ZC3H12B
HLA-F	ANAPC10	TRAPPC3
HLA-G	ANK1	TBC1D5
HPS3	ANKRD28	TSLP
HS3ST1	AOC3	POF1B
HS3ST3B1	AP1AR	FAM229B
HS6ST1	AP1B1	TMEM123
HYAL2	AP1G2	CMTM4
IFNGR2	AP1M2	OAZ2
IFT20	AP1S1	PSEN1
IL15	AP1S3	TMEM41A
IL15RA	AP3M1	TRAF3IP2
IL17RD	AP4E1	CEP85
IL18	AP5B1	PCSK5
ING2	APOH	CASP10
ISLR	APOM	APP
JAG1	APOO	TMBIM4
JAKMIP3	ARCN1	ANO9
JPH4	AREG
KCNA5	ARFGAP1
KDELC1	ARFGAP3
KDELR1	ARFIP1
KIAA1324	ARHGAP4
KIFC3	ARHGEF2
KRT18	ARHGEF7
LACTB2	ARL1
LAMP5	ARMCX3
LAMTOR1	ARPC2
LAP3	ARSA
LDLR	ARSB
LDLRAD1	ARSI
LFNG	ASCC3
LGR5	ASH1L
LIFR	ASIC1
LIMK2	ASTN1
LIPG	ATAT1
LITAF	ATF6B
LMAN2L	ATL3
LYN	ATOX1
MAML2	ATP2C2
MAN1A2	ATP6V1A
MANSC1	ATP8A1
MAP4K2	ATP8A2
MATN3	ATP9B
MDGA1	ATR
MEST	ATXN2
MFNG	AXIN2
MGAT2	B3GALT5
MGAT5B	B3GAT1
MICB	B3GAT3
MIF4GD	B3GNT2
MLST8	B3GNT3
MMP11	B3GNT7
MUC15	B4GALT1
MUC20	B4GALT4
MUC4	B4GALT5
MVB12B	B4GALT7
MYO1B	BACE2
NAPA	BBS1
NAPG	BEGAIN
NBN	BICD2
NCOA7	BLOC1S1
NDFIP2	BLOC1S3
NDST3	BLZF1
NECAB3	BOK
NKD2	BROX
NMT2	C11orf73
NOD2	C12orf43
NOVA2	C1QA
NRGN	C1QTNF3
NRTN	C20orf96
NSG1	C2orf80
NTAN1	C3orf58
NUCB1	C3orf67
OGFRL1	C4orf32
OPALIN	C7orf49
OPTN	CALN1
P2RX3	CALU
P4HB	CAMKMT
PARP10	CAND1
PCED1B	CANT1
PCSK9	CAPN2
PDGFC	CAPN8
PDGFD	CAT
PDIA6	CAV2
PGAP2	CBFA2T3
PHF7	CBLN3
PITPNB	CCDC25
PKDCC	CCDC64
PKMYT1	CCDC68
PLCE1	CCDC93
PLCXD3	CCL2
PLD2	CCNB2
PLSCR1	CD59
PODXL2	CD74
POMT1	CDC123
PPP1R1C	CDC25A
PRKD2	CDC42
PROC	CDC42EP1
PROM1	CDC6
PRRG4	CDIPT
PRTFDC1	CDK13
PRX	CHEK2
PSMD11	CHID1
PTP4A2	CHMP2A
RAB19	CHP1
RAB20	CHPT1
RAB2B	CHSY1
RAB33A	CIB1
RAB37	CLCC1
RANGRF	CLTA
RAP1GAP	CLTC
RARRES1	CLTCL1
RASGEF1A	CLVS1
RASGRF1	CMTM4
RASIP1	CNIH1
RASSF9	CNIH4
RBM20	CNST
RCBTB2	COG4
RND3	COL7A1
RNF157	COMMD1
RNF182	COPB1
RNF214	COPE
RNF24	CORO6
RNPEP	CPQ
RP2	CREB3
RSAD2	CREB3L4
RTN3	CSGALNACT1
RUNX3	CSNK1A1
SCFD1	CTNNA1
SCOC	CTNND2
SCYL3	CUBN
SDC1	CUL3
SDC2	CUL7
SEC11A	CWF19L1
SEC11C	CXCL14
SEC14L5	CXCL8
SECTM1	CYB5R2
SEPP1	CYP2D6
SERTAD1	CYP2E1
SGMS1	CYP2U1
SH3D19	DBI
SLA2	DCBLD2
SLC11A2	DCTN1
SLC18B1	DDX54
SLC23A2	DENND2A
SLC29A3	DENND4C
SLC30A5	DHCR24
SLC30A7	DHRS12
SLC35B2	DIAPH2
SLC35D1	DNAJC5
SLC39A14	DNM2
SLC9A8	DPP7
SLITRK5	DPY30
SNCB	DTX3
SNCG	DYM
SNX2	DYNLT1
SNX5	E2F3
SNX6	EDN1
SORL1	EGFR
SORT1	EI24
SOX7	ELF3
SPATA16	EMP2
SPPL2A	ENTHD2
SRGN	EPB41
ST3GAL2	ERI2
ST3GAL5	ERP44
ST6GAL2	EXOC1
ST6GALNAC6	EXOC5
ST8SIA3	EXOC6
STEAP4	EXOC7
STK16	EXT1
STS	F10
STX10	F2
STX11	F2RL1
SULT1B1	F7
SURF4	FADD
SYNGR4	FAM107B
SYT17	FAM114A1
TAPBP	FAM207A
TAPBPL	FAM20A
THEMIS2	FAM20B
TLR3	FBXL14
TLR8	FBXO31
TMC8	FBXW7
TMED3	FCGBP
TMEM130	FEM1A
TMEM165	FEZ2
TMEM241	FGD1
TMEM25	FGD2
TMEM80	FGD6
TNFAIP2	FGFR2
TPD52	FLNA
TPST2	FLNB
TRAF3IP2	FPR1
TRAPPC2L	FRMD4A
TRAPPC6A	FRMD5
TRIM21	FSTL3
TRIM55	FTH1
TRIM69	FTL
TSC22D3	FUT10
TYMP	FUT11
UBE2O	FUT2
UGGT1	FUT3
UGGT2	FUT4
UGT3A2	FUT6
UNC45A	GAGE1
USE1	GAL3ST2
USF1	GAL3ST4
VAMP5	GALK2
VPS13C	GALNT1
VPS26B	GALNT14
VTI1B	GALNT16
WDR41	GALT
WHAMM	GAS8
WLS	GBA2
WNT5A	GCC1
WNT5B	GCGR
WNT7A	GCNT3
WSCD1	GDF15
ZADH2	GGA3
ZC3H12B	GJA1
ZC3HAV1	GJB2
ZDHHC1	GKAP1
ZDHHC13	GLIPR2
ZMYND19	GLIS3
ZNF148	GLYATL1
	GLYCTK
	GNAI3
	GNB1
	GNB3
	GNPDA1
	GNPNAT1
	GNRH1
	GOLGA7
	GOLGA7B
	GOLGA8N
	GOLIM4
	GOLT1A
	GOLT1B
	GOSR1
	GOSR2
	GPC1
	GPC5
	GPR143
	GRB2
	GRIA1
	GSAP
	GSKIP
	GTF2E1
	GTPBP4
	H1F0
	HEPACAM2
	HERC1
	HKR1
	HLA-A
	HLA-DPA1
	HLA-DPB1
	HMGB1
	HMOX1
	HOXB6
	HRAS
	HS3ST1
	HS3ST2
	HS3ST3A1
	HS6ST2
	HSPA12A
	HSPB8
	ID1
	IFT20
	IGFBP6
	IGFBP7
	IL13RA1
	IL15RA
	IMPAD1
	INMT
	INPP5E
	INSIG2
	ITGA5
	JAG1
	KBTBD8
	KDELC1
	KDELR2
	KIAA0141
	KIAA0319L
	KIAA1324
	KIAA2013
	KIF1C
	KIF3B
	KIFC3
	KLC1
	KLF5
	KLHL12
	KRBOX1
	KRT18
	LACTB2
	LAMTOR1
	LAP3
	LARGE
	LARP7
	LASP1
	LCK
	LDLR
	LHFPL4
	LIG1
	LIMK1
	LMAN1
	LMAN2
	LRIG2
	LRRK2
	LST1
	LUM
	LYN
	LYPLA1
	LZTR1
	MALL
	MAN2A1
	MAP2K1
	MAPK1
	MAPK8IP3
	MAPKAP1
	MAPRE1
	MARCH11
	MDFIC
	METTL15
	MFAP3
	MGAT2
	MGAT5
	MICAL2
	MMD
	MMD2
	MMEL1
	MMGT1
	MMP14
	MOB4
	MON2
	MPHOSPH9
	MPZL3
	MSH6
	MUC1
	MUC12
	MUC13
	MUC20
	MYO1B
	MYO5A
	MYO6
	NAB1
	NAPG
	NAPRT
	NCAM1
	NCAN
	NCKAP5
	NCOA4
	NCSTN
	NDFIP2
	NDST4
	NEDD9
	NEO1
	NFE2L2
	NFKBIE
	NIPA2
	NPC1
	NPC1L1
	NRAS
	NRTN
	NSUN6
	OBSL1
	OCRL
	OGFRL1
	OGN
	OPTN
	OSBP
	PAM
	PAQR3
	PARP10
	PCDH10
	PCNT
	PDCD10
	PGAP2
	PGAP3
	PHF7
	PI4K2A
	PICALM
	PIDD1
	PIEZO1
	PIGQ
	PITPNB
	PITPNM1
	PJA2
	PKDCC
	PLA2G4A
	PLCG1
	PLEKHA3
	PLEKHM2
	POFUT2
	POLL
	POLR1D
	POMT1
	PPIL2
	PPIL6
	PPP1R15A
	PPP1R15B
	PPP2R5C
	PPP6R1
	PRICKLE2
	PRKAR2A
	PRKCD
	PRKG1
	PRMT5
	PROC
	PROM1
	PSENEN
	PSMB3
	PSMB6
	PSMD11
	PSMD6
	PSMG1
	PTBP3
	PTCH1
	PTGDS
	PTHLH
	PTP4A2
	PWP1
	QSOX2
	R3HDM2
	RAB10
	RAB11A
	RAB11FIP1
	RAB11FIP5
	RAB14
	RAB1A
	RAB21
	RAB26
	RAB27B
	RAB29
	RAB30
	RAB31
	RAB32
	RAB38
	RAB7B
	RAB8A
	RAB9A
	RABGAP1L
	RANGRF
	RAPSN
	RASGEF1A
	RASGRP3
	RFC2
	RFNG
	RFX2
	RGS20
	RHEB
	RHOF
	RIC3
	RIN2
	RITA1
	RND3
	RNF121
	RNF126
	RNF139
	RP2
	RPGR
	RPH3A
	RRAD
	RRAGA
	RSAD2
	RTN3
	RUSC1
	RUVBL1
	RXRA
	RYR1
	SCAMP2
	SCAMP3
	SCOC
	SCYL2
	SDC4
	SDE2
	SEC13
	SEC16B
	SEC23B
	SEC23IP
	SEC31B
	SERINC3
	SERPINB2
	SERTAD1
	SGMS2
	SGSM3
	SH3GLB1
	SIPA1L2
	SLC1A5
	SLC26A11
	SLC2A1
	SLC30A1
	SLC30A5
	SLC30A6
	SLC30A7
	SLC33A1
	SLC35A1
	SLC35A2
	SLC35A4
	SLC35B4
	SLC35C1
	SLC35E1
	SLC35G2
	SLC38A10
	SLC39A13
	SLC6A16
	SLC6A4
	SLC9A3R1
	SLC9A7
	SLMAP
	SMAP1
	SMIM13
	SNAP29
	SNX1
	SNX2
	SNX31
	SNX5
	SNX6
	SNX9
	SOD3
	SPATA16
	SPIRE1
	SPPL2A
	SPPL2B
	SPTBN1
	SRGN
	ST3GAL1
	ST8SIA1
	STARD9
	STIP1
	STK11
	STMN4
	STS
	STX16
	STX3
	STX6
	STX8
	SUN3
	SVIP
	SYAP1
	SYNDIG1L
	SYNE1
	SYNGR4
	SYT17
	TAPBP
	TBC1D10C
	TBC1D5
	TCP11L1
	TCTN2
	TENM2
	TERF2
	TFG
	TGFA
	TGFBI
	TGOLN2
	THEMIS2
	TIAL1
	TIPARP
	TIPIN
	TJAP1
	TLR5
	TLR8
	TM9SF1
	TMC8
	TMCO1
	TMED5
	TMEM104
	TMEM127
	TMEM130
	TMEM132A
	TMEM181
	TMEM214
	TMEM241
	TMEM41A
	TMEM43
	TMEM59L
	TMEM80
	TMEM87B
	TMF1
	TNRC6A
	TOM1L2
	TP73
	TRAPPC1
	TRAPPC2L
	TRIM69
	TRIP11
	TSC2
	TSR3
	TVP23A
	TXNDC15
	UBAC1
	UBAP1
	UBIAD1
	UGCG
	UHMK1
	USE1
	UXS1
	VAC14
	VAMP3
	VAMP4
	VAMP7
	VAMP8
	VCP
	VCPIP1
	VMA21
	VPS13A
	VPS26A
	VPS45
	VPS52
	VTI1A
	VTI1B
	WASL
	WDR41
	WHAMM
	WNT10B
	WNT7A
	XRN1
	YES1
	YIF1B
	YIPF5
	YIPF6
	YKT6
	YWHAZ
	ZBED9
	ZC3HAV1
	ZCCHC4
	ZDHHC12
	ZDHHC21
	ZDHHC3
	ZDHHC4
	ZDHHC8
	ZMPSTE24
	ZMYND8
	ZNF576
	ZNF622
	ZP1
	ZW10
	ACSL3
	ADI1
	AOC3
	AREG
	ARFGAP3
	ARHGEF11
	ASCC3
	ATP8B3
	B4GALNT1
	BHLHE40
	C20orf196
	C20orf96
	C2orf76
	CDC6
	CNTNAP2
	COPG1
	CREB3
	CREB3L4
	CTSZ
	CXCL8
	F2R
	FADD
	FEZ1
	GALNT15
	GJB2
	GOSR2
	GRAMD3
	HLA-DPA1
	HLA-DRA
	HSPA5
	IFT74
	IGFBP1
	IGFBP6
	LIG1
	MGAT2
	MKRN2OS
	MUC20
	NCKAP5
	NCSTN
	PGAP3
	PIFO
	PPP1R15A
	R3HDM2
	SEC23B
	SEC31B
	SEPP1
	SLC33A1
	SPEF2
	SPIRE1
	STC2
	STX6
	TPTE2
	VCP
	VPS52
	VTI1A
	WDR88
	ZCCHC4
	ZNF526

## Sheet: T1D-BFA (GA filtered)
Names	total	Genes
T1D_BFA	121	ARHGEF10L
		ARSI
		DPH5
		MDGA1
		TRAF3IP2
		CCNI
		MAN1A1
		PCED1B
		NXN
		ZMYND19
		WSCD1
		NCKAP5
		OAZ2
		FAM8A1
		DHRS11
		SLC39A14
		LYN
		SCPEP1
		SLC23A2
		MGAT2
		GLT8D2
		ISLR
		CYP2U1
		SEC14L5
		B3GNT9
		C1QTNF3
		SCOC
		CLEC14A
		CALML4
		COPE
		CACNB3
		CASP10
		DNAJC5
		HDAC5
		RASGRF1
		SORT1
		PSMG1
		NOVA2
		CD36
		CCNI2
		CD74
		PLSCR1
		ST8SIA3
		PSMD11
		PARP10
		PODXL2
		HELLS
		PCDH18
		SEC11C
		TAF11
		CMTM4
		NTAN1
		JAG1
		PRKCD
		ZNF527
		OSBP
		CEP85
		AP3B1
		VAMP4
		NAB1
		COG2
		ZC3HAV1
		SLC30A5
		PLPP3
		SDE2
		PDGFD
		MEST
		CLEC2D
		RARRES1
		FAM78B
		RBM20
		HLA-A
		GCNT3
		FAM229B
		RAB20
		NYNRIN
		FEM1A
		IFNGR2
		LDLRAD1
		B2M
		MANSC1
		BLZF1
		ARL15
		ARSE
		KDELR1
		SLC30A7
		ZMPSTE24
		LRRC27
		SYNGR4
		PLCXD3
		FKBP9
		NOD2
		VTI1B
		SRGN
		RASGEF1A
		NCOA7
		NMT2
		BCL6
		DOCK4
		ABCC8
		TMEM80
		CHST2
		CYBRD1
		ZC3H12C
		SULT1B1
		SPCS1
		CPQ
		AMIGO2
		ZC3H12B
		CCL2
		GBP4
		SLC18B1
		CSF2RB
		RCBTB2
		HHAT
		MVB12B
		C3orf67
		ZADH2
		CCDC68
		ZNF461
		APBA1

## Sheet: T2D-BFA (GA filtered)
Names	total	Genes
T2D-BFA	204	YIF1B
		MDFIC
		CTNND2
		GDF15
		TM9SF1
		ARL1
		ZNF576
		LAPTM4A
		SLC39A14
		STX8
		ASCC3
		ITM2B
		RXRA
		CAND1
		PPP1R15B
		CYP2U1
		C1QTNF3
		SCOC
		ACBD3
		ZCCHC4
		CACNB3
		TBC1D5
		CASP10
		DNAJC5
		MFAP3
		MSH6
		ADAT2
		RIN2
		GNPDA1
		GCC2
		COPA
		TJAP1
		COPG1
		GOLPH3
		PSMD11
		TMEM104
		ATR
		ZMYND8
		CCDC186
		IGFBP7
		JAG1
		SLC35A5
		PRKCD
		OSBP
		AP3B1
		TOM1L2
		DYM
		YIPF2
		VAMP4
		COG2
		ZC3HAV1
		ACCS
		C17orf75
		AOC3
		EFCAB14
		FURIN
		PLEKHA3
		CWF19L1
		RRAGA
		HLA-A
		ASIC1
		FEM1A
		IMPAD1
		ARFGEF2
		TMEM214
		TLR5
		GCGR
		BEGAIN
		FLNB
		SLC30A7
		TSNAX
		BLOC1S3
		SYNGR4
		GOLGA5
		SRGN
		RASGEF1A
		LHFPL4
		ENPP2
		RIOK3
		TGFB1
		SLC6A16
		TMEM80
		ARSA
		PPT1
		SPCS1
		CPQ
		NIPA2
		BGN
		BROX
		CCL2
		ANAPC10
		PRICKLE2
		HHAT
		SMAP1
		MVB12B
		ZNF287
		CCDC68
		TRIP11
		GBA2
		ARMCX3
		QSOX2
		EI24
		ARSI
		FAM20B
		FAM3C
		HMOX1
		FAM207A
		MAN1A1
		RFC2
		NCKAP5
		CD59
		FAM8A1
		TVP23B
		LYN
		SCPEP1
		EAPP
		GCC1
		MGAT2
		AMFR
		NUCB2
		COPE
		DHRS12
		NEO1
		CCPG1
		MASP2
		PSMG1
		ZBED9
		ZNF526
		PSMD6
		SLC35A2
		CD74
		ARFIP1
		COG5
		SLC35E1
		AKAP9
		SACM1L
		MICAL2
		PARP10
		MAP2K7
		SYTL2
		FUT11
		TGOLN2
		MPZL3
		CMTM4
		HOXB6
		WDR44
		LIG1
		SLC30A6
		ADCY6
		GALNT14
		PWP1
		GOLIM4
		COL16A1
		TP53I11
		OSBPL9
		ARFGAP3
		YIF1A
		NAB1
		GOSR2
		SLC30A5
		SLC35C1
		VPS54
		PEX5
		COPB1
		TMEM41A
		SDE2
		RNF121
		MEST
		GORASP2
		ARFGEF1
		RARRES1
		GCNT3
		RPGR
		FAM114A1
		USO1
		BLZF1
		ZMPSTE24
		YIPF5
		GAK
		ALB
		NOD2
		FEZ2
		VTI1B
		STX6
		ARCN1
		ABCC8
		TTC33
		ERGIC2
		SULT1B1
		GOLGA4
		TMF1
		LRIG2
		ARFGAP1
		SMIM13
		RCBTB2
		PPIL6
		SYAP1
		AP1AR
		RFX2
		C3orf67
		GNB3
		ZNF622
		CDC25A
		APBA1

## Sheet: BFA-T1D-T2D_DEG_overlap
Item	Occurences	Present In
ABCC8	3	T1D	T2D	BFA
AP3B1	3	T1D	T2D	BFA
APBA1	3	T1D	T2D	BFA
ARSI	3	T1D	T2D	BFA
BLZF1	3	T1D	T2D	BFA
C1QTNF3	3	T1D	T2D	BFA
C3orf67	3	T1D	T2D	BFA
CACNB3	3	T1D	T2D	BFA
CASP10	3	T1D	T2D	BFA
CCDC68	3	T1D	T2D	BFA
CCL2	3	T1D	T2D	BFA
CD74	3	T1D	T2D	BFA
CMTM4	3	T1D	T2D	BFA
COG2	3	T1D	T2D	BFA
COPE	3	T1D	T2D	BFA
CPQ	3	T1D	T2D	BFA
CYP2U1	3	T1D	T2D	BFA
DNAJC5	3	T1D	T2D	BFA
FAM8A1	3	T1D	T2D	BFA
FEM1A	3	T1D	T2D	BFA
GCNT3	3	T1D	T2D	BFA
HHAT	3	T1D	T2D	BFA
HLA-A	3	T1D	T2D	BFA
JAG1	3	T1D	T2D	BFA
LYN	3	T1D	T2D	BFA
MAN1A1	3	T1D	T2D	BFA
MEST	3	T1D	T2D	BFA
MGAT2	3	T1D	T2D	BFA
MVB12B	3	T1D	T2D	BFA
NAB1	3	T1D	T2D	BFA
NCKAP5	3	T1D	T2D	BFA
NOD2	3	T1D	T2D	BFA
OSBP	3	T1D	T2D	BFA
PARP10	3	T1D	T2D	BFA
PRKCD	3	T1D	T2D	BFA
PSMD11	3	T1D	T2D	BFA
PSMG1	3	T1D	T2D	BFA
RARRES1	3	T1D	T2D	BFA
RASGEF1A	3	T1D	T2D	BFA
RCBTB2	3	T1D	T2D	BFA
SCOC	3	T1D	T2D	BFA
SCPEP1	3	T1D	T2D	BFA
SDE2	3	T1D	T2D	BFA
SLC30A5	3	T1D	T2D	BFA
SLC30A7	3	T1D	T2D	BFA
SLC39A14	3	T1D	T2D	BFA
SPCS1	3	T1D	T2D	BFA
SRGN	3	T1D	T2D	BFA
SULT1B1	3	T1D	T2D	BFA
SYNGR4	3	T1D	T2D	BFA
TMEM80	3	T1D	T2D	BFA
VAMP4	3	T1D	T2D	BFA
VTI1B	3	T1D	T2D	BFA
ZC3HAV1	3	T1D	T2D	BFA
ZMPSTE24	3	T1D	T2D	BFA
A4GALT	2	T1D	T2D
A4GNT	2	T1D	T2D
ACAP3	2	T1D	T2D
ACBD3	2	T2D	BFA
ACCS	2	T2D	BFA
ACHE	2	T1D	T2D
ACPP	2	T1D	T2D
ACSL4	2	T1D	T2D
ADAT2	2	T2D	BFA
ADCY6	2	T2D	BFA
AKAP9	2	T2D	BFA
ALB	2	T2D	BFA
AMFR	2	T2D	BFA
AMIGO2	2	T1D	BFA
ANAPC10	2	T2D	BFA
ANXA13	2	T1D	T2D
AOC3	2	T2D	BFA
AP1AR	2	T2D	BFA
AP1B1	2	T1D	T2D
AP5B1	2	T1D	T2D
APOB	2	T1D	T2D
APOH	2	T1D	T2D
ARCN1	2	T2D	BFA
ARF5	2	T1D	T2D
ARFGAP1	2	T2D	BFA
ARFGAP3	2	T2D	BFA
ARFGEF1	2	T2D	BFA
ARFGEF2	2	T2D	BFA
ARFIP1	2	T2D	BFA
ARHGEF10L	2	T1D	BFA
ARL1	2	T2D	BFA
ARL15	2	T1D	BFA
ARL3	2	T1D	T2D
ARMCX3	2	T2D	BFA
ARSA	2	T2D	BFA
ARSE	2	T1D	BFA
ASCC3	2	T2D	BFA
ASIC1	2	T2D	BFA
ATP8A1	2	T1D	T2D
ATP8B1	2	T1D	T2D
ATR	2	T2D	BFA
ATXN2	2	T1D	T2D
B2M	2	T1D	BFA
B3GAT3	2	T1D	T2D
B3GNT2	2	T1D	T2D
B3GNT9	2	T1D	BFA
B4GALT1	2	T1D	T2D
B4GALT5	2	T1D	T2D
BCL6	2	T1D	BFA
BEGAIN	2	T2D	BFA
BGN	2	T2D	BFA
BIRC7	2	T1D	T2D
BLOC1S3	2	T2D	BFA
BROX	2	T2D	BFA
BST2	2	T1D	T2D
C17orf75	2	T2D	BFA
C1GALT1C1	2	T1D	T2D
C20orf96	2	T1D	T2D
C4orf32	2	T1D	T2D
C7orf49	2	T1D	T2D
CALML4	2	T1D	BFA
CAMKMT	2	T1D	T2D
CAND1	2	T2D	BFA
CAPN2	2	T1D	T2D
CAT	2	T1D	T2D
CCDC186	2	T2D	BFA
CCNI	2	T1D	BFA
CCNI2	2	T1D	BFA
CCPG1	2	T2D	BFA
CD36	2	T1D	BFA
CD46	2	T1D	T2D
CD59	2	T2D	BFA
CDC25A	2	T2D	BFA
CEP85	2	T1D	BFA
CHID1	2	T1D	T2D
CHPF	2	T1D	T2D
CHST2	2	T1D	BFA
CIB1	2	T1D	T2D
CLEC14A	2	T1D	BFA
CLEC2D	2	T1D	BFA
CLIC5	2	T1D	T2D
CLINT1	2	T1D	T2D
CLTA	2	T1D	T2D
CNGB1	2	T1D	T2D
CNTNAP2	2	T1D	T2D
COG4	2	T1D	T2D
COG5	2	T2D	BFA
COL16A1	2	T2D	BFA
COPA	2	T2D	BFA
COPB1	2	T2D	BFA
COPG1	2	T2D	BFA
CORO6	2	T1D	T2D
CREB3L4	2	T1D	T2D
CRYZ	2	T1D	T2D
CSF2RB	2	T1D	BFA
CTNND2	2	T2D	BFA
CTSC	2	T1D	T2D
CTSZ	2	T1D	T2D
CWF19L1	2	T2D	BFA
CXCL8	2	T1D	T2D
CYB5R2	2	T1D	T2D
CYBRD1	2	T1D	BFA
CYTH3	2	T1D	T2D
DCBLD2	2	T1D	T2D
DCLRE1C	2	T1D	T2D
DCSTAMP	2	T1D	T2D
DCTN3	2	T1D	T2D
DENND5A	2	T1D	T2D
DHRS11	2	T1D	BFA
DHRS12	2	T2D	BFA
DHX58	2	T1D	T2D
DIAPH2	2	T1D	T2D
DOCK4	2	T1D	BFA
DPH5	2	T1D	BFA
DPP7	2	T1D	T2D
DPY30	2	T1D	T2D
DSE	2	T1D	T2D
DYM	2	T2D	BFA
DYNLT1	2	T1D	T2D
EAPP	2	T2D	BFA
EFCAB14	2	T2D	BFA
EI24	2	T2D	BFA
ELF3	2	T1D	T2D
ENPP2	2	T2D	BFA
EPHA4	2	T1D	T2D
ERGIC2	2	T2D	BFA
ERI2	2	T1D	T2D
ERP44	2	T1D	T2D
EVPL	2	T1D	T2D
EXOC6	2	T1D	T2D
F2R	2	T1D	T2D
F2RL1	2	T1D	T2D
F7	2	T1D	T2D
FAM114A1	2	T2D	BFA
FAM207A	2	T2D	BFA
FAM20B	2	T2D	BFA
FAM229B	2	T1D	BFA
FAM3C	2	T2D	BFA
FAM78B	2	T1D	BFA
FBXL14	2	T1D	T2D
FBXW7	2	T1D	T2D
FEZ1	2	T1D	T2D
FEZ2	2	T2D	BFA
FGD1	2	T1D	T2D
FKBP9	2	T1D	BFA
FLNA	2	T1D	T2D
FLNB	2	T2D	BFA
FRMD4A	2	T1D	T2D
FSTL3	2	T1D	T2D
FTH1	2	T1D	T2D
FURIN	2	T2D	BFA
FUT11	2	T2D	BFA
FZD5	2	T1D	T2D
GAK	2	T2D	BFA
GALNT12	2	T1D	T2D
GALNT14	2	T2D	BFA
GALNT16	2	T1D	T2D
GBA2	2	T2D	BFA
GBP4	2	T1D	BFA
GCC1	2	T2D	BFA
GCC2	2	T2D	BFA
GCGR	2	T2D	BFA
GDF15	2	T2D	BFA
GDI2	2	T1D	T2D
GJB2	2	T1D	T2D
GKAP1	2	T1D	T2D
GLT8D1	2	T1D	T2D
GLT8D2	2	T1D	BFA
GNAS	2	T1D	T2D
GNB3	2	T2D	BFA
GNPDA1	2	T2D	BFA
GNRH1	2	T1D	T2D
GOLGA4	2	T2D	BFA
GOLGA5	2	T2D	BFA
GOLIM4	2	T2D	BFA
GOLPH3	2	T2D	BFA
GORASP2	2	T2D	BFA
GOSR2	2	T2D	BFA
GPC1	2	T1D	T2D
GRAMD3	2	T1D	T2D
HDAC5	2	T1D	BFA
HELLS	2	T1D	BFA
HEPACAM2	2	T1D	T2D
HKR1	2	T1D	T2D
HLA-DPA1	2	T1D	T2D
HLA-DPB1	2	T1D	T2D
HLA-DRA	2	T1D	T2D
HMOX1	2	T2D	BFA
HOXB6	2	T2D	BFA
HPD	2	T1D	T2D
HS3ST1	2	T1D	T2D
ID1	2	T1D	T2D
IFNGR2	2	T1D	BFA
IFT20	2	T1D	T2D
IFT74	2	T1D	T2D
IGFBP7	2	T2D	BFA
IL15RA	2	T1D	T2D
IMPAD1	2	T2D	BFA
IPO5	2	T1D	T2D
ISLR	2	T1D	BFA
ITM2B	2	T2D	BFA
KDELC1	2	T1D	T2D
KDELR1	2	T1D	BFA
KIAA0319L	2	T1D	T2D
KIAA1324	2	T1D	T2D
KIFC3	2	T1D	T2D
KLHL12	2	T1D	T2D
KRT18	2	T1D	T2D
LACTB2	2	T1D	T2D
LAMTOR1	2	T1D	T2D
LAP3	2	T1D	T2D
LAPTM4A	2	T2D	BFA
LARP7	2	T1D	T2D
LDLR	2	T1D	T2D
LDLRAD1	2	T1D	BFA
LGR5	2	T1D	T2D
LHFPL4	2	T2D	BFA
LIG1	2	T2D	BFA
LRIG2	2	T2D	BFA
LRRC27	2	T1D	BFA
MAN1A2	2	T1D	T2D
MANSC1	2	T1D	BFA
MAP2K7	2	T2D	BFA
MAP4K2	2	T1D	T2D
MARCO	2	T1D	T2D
MASP2	2	T2D	BFA
MDFIC	2	T2D	BFA
MDGA1	2	T1D	BFA
MFAP3	2	T2D	BFA
MFNG	2	T1D	T2D
MICAL2	2	T2D	BFA
MICB	2	T1D	T2D
MMP11	2	T1D	T2D
MPZL3	2	T2D	BFA
MSH6	2	T2D	BFA
MUC12	2	T1D	T2D
MUC20	2	T1D	T2D
MYO1B	2	T1D	T2D
NAPG	2	T1D	T2D
NBN	2	T1D	T2D
NCAM1	2	T1D	T2D
NCOA7	2	T1D	BFA
NCSTN	2	T1D	T2D
NDFIP1	2	T1D	T2D
NDFIP2	2	T1D	T2D
NEO1	2	T2D	BFA
NGFR	2	T1D	T2D
NIPA2	2	T2D	BFA
NMT2	2	T1D	BFA
NOVA2	2	T1D	BFA
NRGN	2	T1D	T2D
NRTN	2	T1D	T2D
NSUN6	2	T1D	T2D
NTAN1	2	T1D	BFA
NUCB2	2	T2D	BFA
NXN	2	T1D	BFA
NYNRIN	2	T1D	BFA
OAZ2	2	T1D	BFA
OCRL	2	T1D	T2D
OGFRL1	2	T1D	T2D
OPTN	2	T1D	T2D
OSBPL9	2	T2D	BFA
PCDH18	2	T1D	BFA
PCED1B	2	T1D	BFA
PDE9A	2	T1D	T2D
PDGFD	2	T1D	BFA
PDGFRL	2	T1D	T2D
PDIA6	2	T1D	T2D
PEX5	2	T2D	BFA
PGAP2	2	T1D	T2D
PGAP3	2	T1D	T2D
PHF7	2	T1D	T2D
PI4K2A	2	T1D	T2D
PITPNB	2	T1D	T2D
PKDCC	2	T1D	T2D
PLCG1	2	T1D	T2D
PLCXD3	2	T1D	BFA
PLD2	2	T1D	T2D
PLEKHA3	2	T2D	BFA
PLPP3	2	T1D	BFA
PLSCR1	2	T1D	BFA
PODXL2	2	T1D	BFA
POLR1D	2	T1D	T2D
POMT1	2	T1D	T2D
PPIL6	2	T2D	BFA
PPP1R15B	2	T2D	BFA
PPP2R5C	2	T1D	T2D
PPT1	2	T2D	BFA
PRICKLE2	2	T2D	BFA
PRMT5	2	T1D	T2D
PROC	2	T1D	T2D
PROM1	2	T1D	T2D
PRX	2	T1D	T2D
PSMD6	2	T2D	BFA
PTP4A2	2	T1D	T2D
PWP1	2	T2D	BFA
QSOX2	2	T2D	BFA
RAB1A	2	T1D	T2D
RAB20	2	T1D	BFA
RANGRF	2	T1D	T2D
RASGRF1	2	T1D	BFA
RBM20	2	T1D	BFA
RFC2	2	T2D	BFA
RFX2	2	T2D	BFA
RHOBTB3	2	T1D	T2D
RIN2	2	T2D	BFA
RIOK3	2	T2D	BFA
RND3	2	T1D	T2D
RNF121	2	T2D	BFA
RP2	2	T1D	T2D
RPGR	2	T2D	BFA
RRAGA	2	T2D	BFA
RSAD2	2	T1D	T2D
RTN3	2	T1D	T2D
RUNX3	2	T1D	T2D
RXRA	2	T2D	BFA
SACM1L	2	T2D	BFA
SCFD1	2	T1D	T2D
SDC2	2	T1D	T2D
SEC11A	2	T1D	T2D
SEC11C	2	T1D	BFA
SEC14L5	2	T1D	BFA
SECTM1	2	T1D	T2D
SEPP1	2	T1D	T2D
SERTAD1	2	T1D	T2D
SGCE	2	T1D	T2D
SGMS1	2	T1D	T2D
SH3GL2	2	T1D	T2D
SIX5	2	T1D	T2D
SLC11A2	2	T1D	T2D
SLC18B1	2	T1D	BFA
SLC1A5	2	T1D	T2D
SLC23A2	2	T1D	BFA
SLC30A6	2	T2D	BFA
SLC35A2	2	T2D	BFA
SLC35A5	2	T2D	BFA
SLC35C1	2	T2D	BFA
SLC35E1	2	T2D	BFA
SLC6A16	2	T2D	BFA
SLC9A8	2	T1D	T2D
SLMAP	2	T1D	T2D
SMAP1	2	T2D	BFA
SMIM13	2	T2D	BFA
SNCB	2	T1D	T2D
SNX17	2	T1D	T2D
SNX2	2	T1D	T2D
SNX5	2	T1D	T2D
SNX6	2	T1D	T2D
SORT1	2	T1D	BFA
SPATA16	2	T1D	T2D
SPEF2	2	T1D	T2D
SPPL2A	2	T1D	T2D
ST3GAL1	2	T1D	T2D
ST3GAL4	2	T1D	T2D
ST8SIA2	2	T1D	T2D
ST8SIA3	2	T1D	BFA
STC2	2	T1D	T2D
STMN2	2	T1D	T2D
STS	2	T1D	T2D
STX3	2	T1D	T2D
STX6	2	T2D	BFA
STX8	2	T2D	BFA
SVIP	2	T1D	T2D
SYAP1	2	T2D	BFA
SYNDIG1L	2	T1D	T2D
SYT17	2	T1D	T2D
SYTL2	2	T2D	BFA
TAF11	2	T1D	BFA
TAPBP	2	T1D	T2D
TBC1D5	2	T2D	BFA
TCP11L1	2	T1D	T2D
TGFB1	2	T2D	BFA
TGOLN2	2	T2D	BFA
THEMIS2	2	T1D	T2D
TIAL1	2	T1D	T2D
TIPIN	2	T1D	T2D
TJAP1	2	T2D	BFA
TLR5	2	T2D	BFA
TLR8	2	T1D	T2D
TM9SF1	2	T2D	BFA
TMC6	2	T1D	T2D
TMC8	2	T1D	T2D
TMED1	2	T1D	T2D
TMED3	2	T1D	T2D
TMEM104	2	T2D	BFA
TMEM130	2	T1D	T2D
TMEM132A	2	T1D	T2D
TMEM165	2	T1D	T2D
TMEM214	2	T2D	BFA
TMEM241	2	T1D	T2D
TMEM251	2	T1D	T2D
TMEM41A	2	T2D	BFA
TMEM43	2	T1D	T2D
TMEM59	2	T1D	T2D
TMF1	2	T2D	BFA
TOM1L1	2	T1D	T2D
TOM1L2	2	T2D	BFA
TP53I11	2	T2D	BFA
TPD52	2	T1D	T2D
TRAF3IP2	2	T1D	BFA
TRAPPC2L	2	T1D	T2D
TRIM69	2	T1D	T2D
TRIP11	2	T2D	BFA
TSNAX	2	T2D	BFA
TTC33	2	T2D	BFA
TVP23B	2	T2D	BFA
USE1	2	T1D	T2D
USO1	2	T2D	BFA
VAMP5	2	T1D	T2D
VCP	2	T1D	T2D
VMA21	2	T1D	T2D
VPS13C	2	T1D	T2D
VPS54	2	T2D	BFA
WASL	2	T1D	T2D
WDR41	2	T1D	T2D
WDR44	2	T2D	BFA
WHAMM	2	T1D	T2D
WNT7A	2	T1D	T2D
WSCD1	2	T1D	BFA
YIF1A	2	T2D	BFA
YIF1B	2	T2D	BFA
YIPF2	2	T2D	BFA
YIPF5	2	T2D	BFA
ZADH2	2	T1D	BFA
ZBED9	2	T2D	BFA
ZC3H12B	2	T1D	BFA
ZC3H12C	2	T1D	BFA
ZCCHC4	2	T2D	BFA
ZMYND19	2	T1D	BFA
ZMYND8	2	T2D	BFA
ZNF287	2	T2D	BFA
ZNF461	2	T1D	BFA
ZNF526	2	T2D	BFA
ZNF527	2	T1D	BFA
ZNF576	2	T2D	BFA
ZNF622	2	T2D	BFA
ZNF629	2	T1D	T2D
